# Supplementary material for: Patient and provider’s perspective on barriers and facilitators for medication adherence among adult patients with cardiovascular diseases and diabetes mellitus in India: a qualitative evidence synthesis
Source: PubMed Central journal article supplement — BMJ Open. 2022 Mar 23;12(3):e055226. doi: 10.1136/bmjopen-2021-055226 (PMC8948385; doi:10.1136/bmjopen-2021-055226), 2022-03-23
Supplement: bmjopen-2021-055226.draft_revisions.pdf [file bmjopen-2021-055226.draft_revisions.pdf]

# BMJ Open

BMJ Open is committed to open peer review. As part of this commitment we make the peer review history of every article we publish publicly available.

When an article is published we post the peer reviewers' comments and the authors' responses online. We also post the versions of the paper that were used during peer review. These are the versions that the peer review comments apply to.

The versions of the paper that follow are the versions that were submitted during the peer review process. They are not the versions of record or the final published versions. They should not be cited or distributed as the published version of this manuscript.

BMJ Open is an open access journal and the full, final, typeset and author-corrected version of record of the manuscript is available on our site with no access controls, subscription charges or pay-per-view fees (<http://bmjopen.bmj.com>).

If you have any questions on BMJ Open's open peer review process please email [info.bmjopen@bmj.com](mailto:info.bmjopen@bmj.com)

# BMJ Open

**Patient and Provider's perspective on barriers and facilitators for medication adherence among adult patients with Cardiovascular Diseases and Diabetes Mellitus in India – A qualitative evidence synthesis**

|                               |                                                                                                                                                                                                                                        |
|-------------------------------|----------------------------------------------------------------------------------------------------------------------------------------------------------------------------------------------------------------------------------------|
| Journal:                      | <i>BMJ Open</i>                                                                                                                                                                                                                        |
| Manuscript ID                 | bmjopen-2021-055226                                                                                                                                                                                                                    |
| Article Type:                 | Original research                                                                                                                                                                                                                      |
| Date Submitted by the Author: | 06-Jul-2021                                                                                                                                                                                                                            |
| Complete List of Authors:     | Krishnamoorthy, Yuvaraj; JIPMER PSM, Rajaa, Sathish; Jawaharlal Institute of Postgraduate Medical Education, Rehman, Tanveer; Public Health Specialist Thulasingam, Mahalakshmi ; JIPMER, Department of Preventive and Social Medicine |
| Keywords:                     | QUALITATIVE RESEARCH, PREVENTIVE MEDICINE, PRIMARY CARE, Coronary heart disease < CARDIOLOGY, DIABETES & ENDOCRINOLOGY                                                                                                                 |
|                               |                                                                                                                                                                                                                                        |

SCHOLARONE™  
Manuscripts

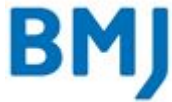

I, the Submitting Author has the right to grant and does grant on behalf of all authors of the Work (as defined in the below author licence), an exclusive licence and/or a non-exclusive licence for contributions from authors who are: i) UK Crown employees; ii) where BMJ has agreed a CC-BY licence shall apply, and/or iii) in accordance with the terms applicable for US Federal Government officers or employees acting as part of their official duties; on a worldwide, perpetual, irrevocable, royalty-free basis to BMJ Publishing Group Ltd ("BMJ") its licensees and where the relevant Journal is co-owned by BMJ to the co-owners of the Journal, to publish the Work in this journal and any other BMJ products and to exploit all rights, as set out in our [licence](#).

The Submitting Author accepts and understands that any supply made under these terms is made by BMJ to the Submitting Author unless you are acting as an employee on behalf of your employer or a postgraduate student of an affiliated institution which is paying any applicable article publishing charge ("APC") for Open Access articles. Where the Submitting Author wishes to make the Work available on an Open Access basis (and intends to pay the relevant APC), the terms of reuse of such Open Access shall be governed by a Creative Commons licence – details of these licences and which [Creative Commons](#) licence will apply to this Work are set out in our licence referred to above.

Other than as permitted in any relevant BMJ Author's Self Archiving Policies, I confirm this Work has not been accepted for publication elsewhere, is not being considered for publication elsewhere and does not duplicate material already published. I confirm all authors consent to publication of this Work and authorise the granting of this licence.

1  
2  
3 **Patient and Provider's perspective on barriers and facilitators for medication adherence**  
4 **among adult patients with Cardiovascular Diseases and Diabetes Mellitus in India – A**  
5 **qualitative evidence synthesis**  
6  
7  
8  
9

10 **Running head:** Barriers and facilitators for medication adherence among CVD and DM  
11 patients in India  
12  
13

14 **Article category:** Systematic Review  
15

16 **Yuvaraj Krishnamoorthy<sup>1</sup>, Sathish Rajaa<sup>2</sup>, Tanveer Rehman<sup>3</sup>, Mahalakshmy**  
17 **Thulasingam<sup>4</sup>**  
18  
19

20  
21 <sup>1</sup>Assistant Professor, Department of Community Medicine, ESIC Medical College & PGIMSR,  
22 K.K. Nagar, Chennai, India;  
23  
24

25 **Contact Number:** +91 9551892665  
26  
27

28 **Email id:** [yuvi.1130@gmail.com](mailto:yuvi.1130@gmail.com)  
29  
30

31 <sup>2</sup>Assistant Professor, Department of Community Medicine, ESIC Medical College & PGIMSR,  
32 K.K. Nagar, Chennai, India;  
33  
34

35 **Contact Number:** +91 9791974633  
36  
37

38 **Email id:** [psrajaa2410@gmail.com](mailto:psrajaa2410@gmail.com)  
39  
40

41 <sup>3</sup>Independent Author, Kolkata, West Bengal, India  
42  
43

44 **Contact Number:** +91 8336922482  
45  
46

47 **Email id:** [drtanveerrehman@gmail.com](mailto:drtanveerrehman@gmail.com)  
48  
49

50 <sup>4</sup>Associate Professor, Department of Preventive and Social Medicine, Jawaharlal Institute of  
51 Postgraduate Medical Education and Research (JIPMER), Puducherry - 605006, India;  
52  
53

54 **Contact Number:** +91 9488729774  
55  
56

57 **Email id:** [mahalakshmi.dr@gmail.com](mailto:mahalakshmi.dr@gmail.com)  
58  
59

60 **Corresponding Author:**

Dr Sathish Rajaa,

1  
2  
3 Assistant Professor,

4  
5 Department of Community Medicine,

6  
7 ESIC Medical College & PGIMSR, K.K. Nagar, Chennai, India

8  
9  
10 **Contact Number:** +91 9791974633

11  
12 **Email id:** psrajaa2410@gmail.com

13  
14  
15 **Strengths and Limitations:**

- 16  
17  
18  
19  
20  
21  
22  
23  
24  
25  
26  
27  
28  
29  
30  
31  
32  
33  
34  
35  
36  
37  
38  
39  
40
- This is the first review exploring factors associated with drug adherence among CVD & DM patients in India
  - Patient-related barrier was lack of knowledge about their condition, forgetfulness, stigma and stress
  - Care team-related barrier was lack of family support, risk communication and physician attitude
  - Health system-related barriers were accessibility, affordability, availability and acceptability
  - Solutions to address these barriers were peer support group, digital reminders and innovations in patient care

41  
42  
43  
44  
45  
46  
47  
48  
49  
50  
51  
52  
53  
54  
55  
56  
57  
58  
59  
60

41 **Abstract:**

42  
43  
44 **Background:**

45  
46 In spite of recent technological and pharmacological advancements to treat and monitor  
47  
48 diabetes mellitus (DM) and cardiovascular disease (CVD) patients, medication adherence is of  
49  
50 particular concern in countries like India. Hence, this review was done to explore the various  
51  
52 stakeholders' perspective on barriers and facilitators for medication adherence among CVD  
53  
54 and DM patients.

55  
56  
57 **Methods:**

1  
2  
3 A comprehensive systematic search was conducted in Medline, Cochrane library,  
4 ScienceDirect and Google Scholar from January 2010 to July 2020. We used framework for  
5 systems approach to healthcare delivery to conduct thematic analysis and derive relevant  
6 themes, sub-themes and codes.  
7  
8  
9

### 10 11 12 **Results:**

13  
14 In total, 18 studies were included. Major barrier reported was lack of understanding about the  
15 disease, complications related to non-adherence, and treatment schedule followed by  
16 forgetfulness, lack of family support and risk communication. Health system-related barriers  
17 such as accessibility, affordability, and acceptability were also reported by majority of the  
18 studies. Creation of peer support group, digital reminder system, integration of AYUSH,  
19 mental health, physiotherapy and geriatric clinics at primary healthcare level and innovations  
20 in patient care were suggested to counter these barriers in medication adherence.  
21  
22  
23  
24  
25  
26  
27  
28  
29

### 30 31 **Conclusion:**

32  
33 Such targeted interventions should be developed to achieve better control among CVD and DM  
34 patients.  
35  
36

37  
38 **Keywords:** Cardiovascular Diseases, Diabetes Mellitus, Medication Adherence, Qualitative  
39 Research  
40  
41  
42  
43  
44  
45  
46  
47  
48  
49  
50  
51  
52  
53  
54  
55  
56  
57  
58  
59  
60

## INTRODUCTION

Cardiovascular diseases (CVDs) are the leading cause of mortality globally and in India.<sup>1,2</sup> More than a quarter (28%) of all deaths in India are attributable to CVDs with Ischemic heart disease (IHD) and stroke constituting the majority (83%).<sup>3</sup> On the other hand, India ranks second after China in the global diabetes epidemic, with a prevalence of around 10%.<sup>4</sup> Both diabetes mellitus (DM) and hypertension have long been recognized as independent risk factors for CVDs, whereas adherence to prescribed hypoglycaemic and antihypertensive drug therapies have significantly reduced the risk.<sup>5-7</sup> At least half of hypertensive & DM patients stop taking their medication within a year, often without informing their provider, with further attrition over time accomplishing medication adherence a significant public health priority.<sup>8</sup> Medication adherence is defined as the extent to which a person's behaviour coincides with the agreed medication regimen or health advice from a health care provider.<sup>9</sup> It has three components: initiation (when the patient takes the first dose of prescribed medication), implementation (the extent to which a patient's actual dosing corresponds to the prescribed dosing regimen), and discontinuation (when no more doses are taken after that).<sup>10</sup> Medication adherence is of growing interest to clinicians, healthcare systems, and other stakeholders (e.g., payers). There is soaring evidence that nonadherence is often associated with lower quality of life, adverse clinical events, increased need for medical interventions, mortality, and eventually avoidable healthcare out-of-pocket expenditure.<sup>11</sup> Non-adherent hypertensive and stable coronary heart disease (CHD) patients have a five and four times higher risk of developing CHD and death when compared to adherent patients.<sup>12,13</sup> Similarly, the likelihood of hospitalization is doubled among DM & hypertensive patients who are non-adherent to prescribed therapies compared with the general population. Despite recent advancements in pharmacologic treatment and technology to treat and monitor DM and CVD patients,

1  
2  
3 medication adherence is of particular concern in low-and-middle-income countries (LMIC)  
4 like India, where accessibility and affordability are still issues.<sup>3,14</sup>  
5  
6

7 Barriers to adherence can be comprehended as the patient, medication, provider, and health  
8 system factors with interactions among them.<sup>15,16</sup> Patient factors that influence adherence  
9 include poor health literacy, cultural beliefs regarding medication effectiveness, and religious  
10 healing practices.<sup>16</sup> Low income, forgetting to take medication, and perceptions regarding pills  
11 like safety concerns, convenience, and necessity add to the above list.<sup>15,16</sup> Inadequate  
12 knowledge about a drug and its use, not being convinced of the need for medication, fear of  
13 adverse effects, and long-term treatment regimens also prompt medication discontinuation.<sup>14</sup>  
14 Clinician factors cover failure to recognize nonadherence, prescription of complex and  
15 multidrug regimens, ineffective communication of benefits, and excluding patients in the  
16 treatment decision-making process.<sup>16</sup> Health system factors comprise limited insurance  
17 coverage, poor coordination of care between inpatient and outpatient settings, and inadequate  
18 communication between prescribers (i.e., specialists and primary care clinicians). In addition,  
19 the caregivers' aspect also becomes relevant in determining patients' adherence as CVD patients  
20 with a caregiver are more likely to be adherent to medications.<sup>17</sup> Hence identifying specific  
21 barriers for each patient and adopting suitable techniques to overcome them is imperative to  
22 improve medication adherence. Some of the facilitators successful in overcoming these barriers  
23 include a personal medication counsellor in the care continuum to guide patients with  
24 medication use, single-pill fixed-dose combinations, training pharmacists as coaches for drug  
25 therapies, building peer groups for chronic conditions, and developing information systems in  
26 the follow-up of patients.<sup>18</sup>  
27  
28  
29  
30  
31  
32  
33  
34  
35  
36  
37  
38  
39  
40  
41  
42  
43  
44  
45  
46  
47  
48  
49  
50  
51  
52

53 Quantitative studies have focused on medication adherence incidence and identification of its  
54 potential risk factors. They do not, however, uncover life circumstances that may influence  
55 adherence from the patient perspective. The inclusion of qualitative studies in our review will  
56  
57  
58  
59  
60



1  
2  
3 provide a better understanding of the barriers and facilitators from the perspective and  
4 experiences of patients, healthcare providers, and caregivers. Furthermore, this synthesis of  
5 qualitative evidence aims to generate relevant and meaningful findings appropriate to the  
6 individuals, develop a research plan, and eventually help make an effective policy and practices  
7 in improving adherence among the patients. Therefore, the current review was done to  
8 understand the perspective of various stakeholders (patients, caregivers, and healthcare  
9 providers) on the barriers and facilitators for medication adherence among CVD and DM  
10 patients in India. We also explored the suggestions and solutions provided by these  
11 stakeholders in overcoming the reported barriers.  
12  
13  
14  
15  
16  
17  
18  
19  
20  
21  
22  
23  
24

## 25 **METHODS**

26  
27  
28 This review was performed by adhering to the “enhancing transparency in reporting the  
29 synthesis of qualitative research (ENTREQ)” statement.<sup>19</sup> We registered our protocol in the  
30 PROSPERO database (Registration number - CRD42020199529). We also searched  
31 PROSPERO and Cochrane to ensure that no similar review protocol has been reported. We  
32 also performed a preliminary search to ensure that no previous reviews of our similar topic  
33 targeting the Indian population were published.  
34  
35  
36  
37  
38  
39  
40  
41

### 42 **Study design**

43  
44 We performed an evidence synthesis of the available qualitative evidence on the barriers and  
45 facilitating factors for medication adherence among CVD and DM patients. This review helped  
46 synthesize the evidence of peer-reviewed articles in this field and built an organized empirical  
47 research outline based on prior knowledge.  
48  
49  
50  
51  
52

### 53 ***Eligibility criteria***

#### 54 *Study type*

55  
56  
57  
58  
59  
60

1  
2  
3 We have included qualitative peer-reviewed studies conducted in India for our current review.  
4  
5 Furthermore, qualitative evidence from other mixed methods studies was screened for  
6  
7 eligibility and included in the qualitative component was relevant to our review. In addition,  
8  
9 we included studies using qualitative techniques for data collection such as focussed group  
10  
11 discussion (FGD), in-depth interviews (IDI), and Key Informant Interviews (KII).  
12  
13

#### 14 *Participant type*

15  
16 We have included the studies reporting the barriers and facilitators of medication adherence  
17  
18 from patients' perspectives (CVD and DM), family members, healthcare workers (HCWs), or  
19  
20 health system policymakers in India. HCWs were defined as per WHO recommendation as "all  
21  
22 the persons involved in the actions whose primary intent is to enhance the health."<sup>20</sup>  
23  
24

#### 25 *Outcome*

26  
27 The phenomenon of interest in our review was the barriers and facilitators for medication  
28  
29 adherence among CVD and DM patients and the suggestions and solutions to address the  
30  
31 barriers and improve compliance as experienced by the patients, caregivers, family members,  
32  
33 HCWs, and other relevant stakeholders.  
34  
35

#### 36 *Exclusion criteria*

37  
38 We have excluded the studies not available in English, books or conference abstracts or grey  
39  
40 literature, or editorial comments. We have also excluded the studies reporting only quantitative  
41  
42 data such as cross-sectional surveys, case-control, cohort studies, or intervention trials.  
43  
44  
45

#### 46 **Search strategy**

47  
48 We have conducted a comprehensive and systematic search in databases and search engines  
49  
50 such as Medline, Cochrane library, ScienceDirect, and Google Scholar. A combination of  
51  
52 medical subject heading (MeSH) and free-full text terms was used for carrying out a literature  
53  
54 search. The detailed search strategy and search results in the databases mentioned above and  
55  
56 search engines are provided in Supplementary File 1. In addition to this, we also checked the  
57  
58  
59  
60

1  
2  
3 reference list of primary studies obtained via electronic search and included articles relevant to  
4  
5 our review and analysis. The search was conducted in all the databases from January 2010 to  
6  
7 July 2020 with English language restriction for publication. Furthermore, the search timeline  
8  
9 was restricted to ensure that our work provides a broader view and identifies the emerging  
10  
11 issues.  
12  
13

### 14 **Study selection process**

15  
16 Two investigators (YK and TR) independently performed the literature search, screened the  
17  
18 title and abstract of all the identified studies, and retrieved the full text for articles relevant to  
19  
20 our review. Further full-text screening of the retrieved articles was done again independently  
21  
22 by the two investigators (YK, TR) to select the studies matching the eligibility criteria of our  
23  
24 review. Disagreements during this process between the two investigators were resolved  
25  
26 through consultation with a third investigator (SR).  
27  
28  
29

### 30 **Data Extraction and Management**

31  
32 After the study selection, two investigators (YK and TR) independently extracted the relevant  
33  
34 data and study characteristics onto a predetermined data extraction format. Data entry was  
35  
36 double-checked for accuracy by a third investigator (SR) by comparing the data presented in  
37  
38 the review and individual study reports. As a result, we have extracted the following study  
39  
40 characteristics: general information such as the name of the first author, the country in which  
41  
42 the study was done, and year of publication, in the methods section, data collection period,  
43  
44 study design, study participants, sample size, sampling technique, and data collection  
45  
46 procedure. In addition, barriers, facilitators, suggestions, and solutions to medication adherence  
47  
48 were identified systematically.  
49  
50  
51  
52

### 53 **Quality assessment**

54  
55 Two investigators (YK and SR) independently performed the quality check using the Critical  
56  
57 Appraisal Skills Programme (CASP) criteria.<sup>22</sup> This checklist has been widely used for  
58  
59  
60

1  
2  
3 assessing the quality of studies included in this Qualitative Evidence synthesis. This has helped  
4  
5 determine whether the studies included are coherent with the quality appraisal standard for  
6  
7 qualitative studies. This checklist consists of 10 questions concerning the study's clarity,  
8  
9 methodology, and results to rank the included studies. Subsequently, these studies were  
10  
11 stratified into high quality (three stars for studies scoring 8 to 10 points), medium quality (two  
12  
13 stars for studies scoring 4 to 7 points), and low rate (one star for studies scoring 0 to 3 points).  
14  
15 We did not exclude the low-quality studies, but the interpretation of results was made with  
16  
17 caution. Disagreements during the quality assessment process were resolved by discussion with  
18  
19 the third investigator (TR).  
20  
21  
22

### 23 **Data Analysis**

24  
25 We analysed and reported the findings in separate clusters such as patients, caregivers, family  
26  
27 members, HCWs, and policymakers to demonstrate the differences among these subgroups.  
28  
29 We have adopted a thematic framework analysis to analyse and synthesize the data. Thematic  
30  
31 framework analysis has been helpful as the evidence was primarily descriptive and improved  
32  
33 our understanding of the barriers and facilitators in medication adherence among CVD and DM  
34  
35 patients, and helped to identify the solutions for the same. This framework synthesis has five  
36  
37 stages of synthesizing the qualitative data.  
38  
39  
40

41  
42 ***First stage - Familiarisation with the data:*** Primary investigator (YK) did the process of  
43  
44 familiarisation with data by reviewing all the selected articles against the objective of our  
45  
46 review and found the recurrent themes across the included studies.  
47  
48

49  
50 ***The second stage - Identifying the thematic framework:*** The investigators used a  
51  
52 predetermined thematic framework developed using literature to guide the thematic analysis.  
53  
54 However, we have adopted this thematic framework based on the themes emerging in our  
55  
56 research. This final framework has provided a detailed list of facilitators and barriers for  
57  
58 medication adherence and also solutions to address the issue.  
59  
60

1  
2  
3 **Third stage - Indexing:** Two independent investigators (YK and TR) have read the extracted  
4 information and searched for the themes as per the predetermined thematic framework and  
5 additional emerging themes. The framework underwent several revisions as and when a new  
6 theme emerged. This has been performed through discussion and agreement between the entire  
7 team of investigators. Next, all the studies were completely read and examined till there was  
8 no new emergent theme. Coding of the data was then done as per the themes identified in our  
9 analysis. Finally, each preliminary study indexing was done using the codes related to the  
10 thematic framework. Whenever appropriate, sections of the studies were indexed with one or  
11 more codes.  
12  
13  
14  
15  
16  
17  
18  
19  
20  
21  
22

23 **Fourth stage - Charting:** The investigators have sorted the data based on the themes and  
24 presented these themes in the tabular format (chart). The rows and columns of the table indicate  
25 the themes related and the studies, which enabled us to compare the study findings across  
26 various themes and subthemes.  
27  
28  
29  
30  
31  
32

33 **Fifth stage - Mapping and interpretation:** The investigators used these charts to define the  
34 concepts identified and mapped the nature and range of phenomena. Our review explored the  
35 associations between the various themes and helped in clarifying the findings. Finally, we  
36 mapped and interpreted the findings in line with our objectives and emergent themes.  
37  
38  
39  
40  
41

#### 42 **Patient and Public Involvement:**

43 Patients or the public were not involved in the design, or conduct, or reporting, or  
44 dissemination plans of our research  
45  
46  
47  
48  
49

## 50 **Results**

### 51 **Study selection**

52  
53  
54  
55  
56  
57 A comprehensive and systematic search was done to identify the relevant studies from January  
58 2010 to July 2020. In total, we identified 1187 citations, and after the removal of duplicates  
59  
60

1  
2  
3 from multiple databases, 982 records were screened for their title and abstract and assessed for  
4 eligibility. From these records, we retrieved 33 articles, and after going through the full text of  
5 these articles, 18 studies were included in the review. (**Figure 1**).<sup>22-39</sup>

### 10 **Characteristics of the studies included**

11  
12 Characteristics of the included studies are reported in **Table 1**. Of the 18 studies included, 9  
13 (50%) were from the Southern region, followed by 7 (38%) from the Northern part of India.  
14  
15 The mean age of the participants ranged from 25-76 years. The typology of the studies  
16 comprised of in-depth interviews (IDIs) and focussed group discussions (FGDs). The study  
17 participants were primarily patients with diabetes, hypertension, or any cardiovascular diseases  
18 (to explore the patient perspective), and health care workers (4 studies) providing care to them  
19 (to obtain the provider perspective). The total sample size of the included studies ranged from  
20 6 to 100. The majority (10 of the included studies) were done in a community setting, while  
21 the rest were either facility-based or had participants from ongoing trials. Four of the included  
22 studies used software for analysing the qualitative data, while the rest followed manual  
23 methods. Most of the included studies (14 out of 18) had higher ratings indicating high-quality  
24 evidence.

### 39 **Narrative synthesis**

40  
41 Significant findings from the review showed that factors contributory to adherence come under  
42 three themes: patient-related, family-related, and health system-related factors. The barriers,  
43 facilitators, and suggestions to improve medication adherence were summarized under these  
44 three themes.

### 51 **Barriers in medication adherence**

52  
53 **Table-2** shows the thematic framework analysis related to barriers in medication adherence  
54 among CVD and DM patients. All the 18 included studies have explored and reported on these  
55 barriers.

### *Patient-related factors*

A significant patient-related barrier (10 studies) reported was a lack of knowledge or understanding about the disease, its complications related to nonadherence, and the treatment schedule. The following common patient-related barrier (7 studies) was the forgetfulness to take medicine. Reasons provided for the same were the patients' busy schedule, laziness, or forgetting to take the medication while traveling out-of-station. Patients have also reported certain misconceptions about the medicines like the risk of long-term neurological illness because of medication intake, inferior quality of drugs provided in hospitals, and wrong perception about stopping the medications once the patient feels normal. Patients in some studies have reported that they practice alternate systems of medicine such as herbal medicines and avoid taking allopathic medicines leading to poorer control of their condition. Substance use such as alcohol or tobacco use, side effects related to drugs, stress, and stigma were reported to be some of the barriers by the patients in adhering to the medications.

### *Family-related factors*

The patients and providers have reported a lack of family support as a significant contributing factor for nonadherence. For example, there was a lack of support provided by family members or caregivers in reminding the patient to take medications or accompanying the patient for a visit to healthcare facilities. In addition, the lack of social and emotional support to the patients further contributes to the nonadherence among the patients suffering from CVDs and DM. Domestic works, personal priorities, commitments, or other issues hinder the family members from providing the above-mentioned support to the patients.

### *Health system-related factors*

In most of these studies, providers were also interviewed to understand the factors related to the health system responsible for nonadherence among CVD and DM patients. Healthcare providers and patients interviewed in almost all these studies have reported affordability,

1  
2  
3 accessibility, and acceptability as the major factors hindering medication adherence.  
4  
5 Affordability is an issue with patients seeking healthcare in private facilities and patients  
6  
7 getting care in public healthcare facilities. Though there is no direct medical cost related to  
8  
9 government hospitals or primary healthcare centres, direct non-medical costs such as transport  
10  
11 (due to poor accessibility) and indirect costs such as loss of wages (due to inconvenient  
12  
13 consultation timing) were higher amongst these patients. In addition, patients have a wrong  
14  
15 perception that medications in public facilities are of poorer quality, making them choose  
16  
17 private health facilities, including those belonging to lower socioeconomic status. Lack of risk  
18  
19 communication, counselling, or empathy by the physicians mainly due to overburdening public  
20  
21 health facilities and time constraints were the other health system-related barriers reported by  
22  
23 the providers and patients.  
24  
25  
26  
27

### 28 **Facilitators in medication adherence**

29  
30 Facilitators in medication adherence were also summarized using the pre-existing thematic  
31  
32 framework (**Table-3**). In total, ten studies have explored the facilitators in medication  
33  
34 adherence from the patient or providers' perspective.  
35  
36

#### 37 *Patient-related factors*

38  
39 Most of the studies (5 studies) reported fear of complications due to nonadherence and self-  
40  
41 perception of being healthy (once they adhere to the medications) as the significant facilitators.  
42  
43 In addition, having a reminder system in the form of reminder notebook, separate  
44  
45 pillboxes/cases/covers or personalized shelf facilitate the patients in adhering to the  
46  
47 medications. Some studies have also reported that integrating drug intake into daily routine  
48  
49 activities and peer influence acts as a good facilitator in compliance with medications.  
50  
51  
52

#### 53 *Family-related factors*

54  
55 Family support was reported as a major facilitating factor for compliance with medication.  
56  
57 Apart from the support, adverse experiences in the past, such as death or severe complications  
58  
59  
60



1  
2  
3 among the family members, instilled fear in the patients, making them more compliant to the  
4  
5 medications.

#### 6 7 *Health system-related factors*

8  
9  
10 Barriers reported in some of the studies, such as empathy and counselling by healthcare  
11  
12 providers, were considered facilitators by the other studies' patients. Another major facilitator  
13  
14 from the health system side is the trust that patient has on their physician and follow the advice  
15  
16 related to self-care and adherence effectively. Other familiar facilitators reported by the patients  
17  
18 and providers were the dedicated pill cover/boxes for each drug provided in the clinic, linkage  
19  
20 of health services with NGO for provision of counselling and generating awareness, availability  
21  
22 of medication, and use of polypills.  
23  
24

#### 25 26 **Suggestions to improve medication adherence**

27  
28 Suggestions and solutions to enhance the compliance to medication were reported in 16 out of  
29  
30 the 18 included studies based on either patient or provider's perspective (**Table-4**). Few  
31  
32 suggestions were related to patients and family members, while the majority were related to  
33  
34 the change in the health system.  
35  
36

#### 37 38 *Patient and family-related factors*

39  
40 Creating or joining a peer support group was one of the major suggestions related to the  
41  
42 patients. This will help by motivating the patients to be more compliant with medications and  
43  
44 other self-care practices. Digital reminder systems using a watch and a mobile phone can also  
45  
46 improve medication adherence. Related to family members, social, emotional, and financial  
47  
48 support to the patients has been reported as an essential suggestion by most studies.  
49  
50

#### 51 52 *Health system-related factors*

53  
54 Innovations in patient care have been necessitated as an important factor to promote drug  
55  
56 adherence. This is mainly because the barriers reported by the patients were almost similar  
57  
58 across the studies, and the interventions followed till now don't seem to address these issues.  
59  
60

1  
2  
3 Some of the innovations suggested were dedicated days for specific disease conditions to avoid  
4 overburdening the facilities, a dedicated counselling station for drug adherence during the  
5 clinic with separate human resources as the physician has time constraints during the clinic,  
6 and a unique pill dispensing mechanism like colour coding, etc. In addition, information  
7 Education and Communication (IEC)/Behaviour change communication (BCC) campaigns,  
8 digitalizing the patient treatment record, linkage of healthcare services with NGOs or  
9 community-based organizations, regular training of healthcare workers, and promotion of  
10 polypill use were other common suggestions offered by the healthcare providers.  
11  
12  
13  
14  
15  
16  
17  
18  
19  
20  
21

## 22 **Discussion**

23 We conducted this review to integrate the qualitative evidences on barriers and facilitators for  
24 medication adherence among CVD and DM patients in India. We also further explored the  
25 suggestions to improve the same. The studies included in our review involved a total of 636  
26 participants (534 CVD and DM patients, 102 healthcare providers). Majority of the included  
27 studies were of high quality with respect to study clarity, methodology and results. We  
28 summarized under three major themes: barriers, facilitators, suggestions and reported the  
29 findings under the following four sub-themes: patients, care team, healthcare organization and  
30 environment-related factors.  
31  
32  
33  
34  
35  
36  
37  
38  
39  
40  
41

### 42 *Comparison of findings with previous literature*

#### 43 *Barriers in medication adherence*

44 Major barriers were lack of patient's understanding about the disease and its complications,  
45 forgetfulness and misconception about the medications. lack of family support was seen as a  
46 major barrier from both patient's and provider's perspective. In addition to these factors, stress  
47 and stigma were also mentioned as an important factor for the patients to not take medicine on  
48 time. We also found major health system related barriers such as lack of accessibility,  
49 availability, higher cost and poor physician attitude. These findings were in line with the  
50  
51  
52  
53  
54  
55  
56  
57  
58  
59  
60

1  
2  
3 previous review conducted among South East Asian DM patients.<sup>40</sup> In addition, our findings  
4  
5 were also similar to the patients belonging to non-English speaking Hispanic, South American  
6  
7 ethnic group, as they also had misconceptions related to therapy, lack of understanding about  
8  
9 their condition, stress and stigma as a factor for non-adherence.<sup>41-43</sup>  
10  
11

### 12 *Facilitators in medication adherence*

14 Fear of complications, self-perception of being healthy, having a reminder system were  
15  
16 reported as the major facilitators by patients. Physician trust, advice, empathy, counselling was  
17  
18 some of the provider-related facilitators in adhering to medications. Common facilitators  
19  
20 reported by the patients and providers were the dedicated pill cover/boxes for each drug  
21  
22 provided in the clinic, availability of medication and use of polypills. These findings were also  
23  
24 in line with the previous qualitative reviews conducted in low middle-income countries  
25  
26 including India.<sup>41-43</sup>  
27  
28  
29

### 30 *Suggestions to improve medication adherence*

32 The solutions provided by the patients and health professionals were in line with the barriers  
33  
34 identified in our review. Proper physician counselling to make the patients understand about  
35  
36 their own condition, complications and avoid misconception about the drugs and its side  
37  
38 effects, good family support, making the medication accessible and available free of cost were  
39  
40 suggested as major suggestions to improve medication adherence. Similar interventions were  
41  
42 also suggested by previous qualitative evidences on medication adherence among CVD and  
43  
44 DM patients.<sup>40-43</sup>  
45  
46  
47

### 48 *Strengths and limitations of the study*

50 To the best of our knowledge, this is the first review exploring and synthesizing the qualitative  
51  
52 factors associated with medication adherence among CVD and DM patients in India. We  
53  
54 provided a comprehensive and systematic evidence on the barriers, facilitators related to  
55  
56 medication adherence, adhering to the ENTREQ statement and ensuring transparency and  
57  
58  
59  
60

1  
2  
3 reproducibility of our findings. We examined these evidences through the lenses of well-  
4 established theoretical framework model. Moreover, our study was able to provide valuable  
5 suggestions to promote the medication adherence from both patients and provider's  
6 perspective. In addition to these strengths, we found that the highest rated studies contributed  
7 to majority of the factors found in our review. This in turn ensures the transferability (external  
8 validity) of our review findings.  
9

10  
11 However, our review has certain limitations. We did not search the grey literature, possibly  
12 missing some insights for our review. Hence, we cannot rule out of the dissemination bias with  
13 respect to accurate and complete representation of phenomenon of interest. We focussed  
14 primarily on the patient and provider perspective on medication adherence.<sup>44</sup> Hence, we cannot  
15 comment on the organizational or political influences on the adherence to long-term therapies  
16 as mentioned in the WHO report.<sup>16</sup> The sample size of the included studies can be considered  
17 as relatively low (median sample size - 30). However, all the studies were conducted till the  
18 achievement of data saturation.  
19

### 20 *Implications for clinical and public health practice*

21  
22 Improving medication adherence is essential to achieve better control and prevent life-  
23 threatening complications. Factors related to patients such as self-awareness and fear about the  
24 condition and its complications acted as major facilitator for medication adherence. We also  
25 found certain modifiable barriers related to medical intake such as forgetfulness, lack of  
26 knowledge, and misconception about medications. Interventions should focus on these  
27 modifiable barriers such as knowledge barriers, intention barriers and health system-related  
28 barriers to achieve better adherence. In addition, it is important for the family members to help  
29 the patients in mapping the daily routine and link the medicine intake with these routines to  
30 facilitate the adherence. Our review also suggested that healthcare providers play an important  
31 role in promoting the medication adherence. Hence, the interventions should not only target  
32  
33  
34  
35  
36  
37  
38  
39  
40  
41  
42  
43  
44  
45  
46  
47  
48  
49  
50  
51  
52  
53  
54  
55  
56  
57  
58  
59  
60

1  
2  
3 the patients, but also the family members and healthcare providers and it should be tailored to  
4  
5 the differences in setting, culture and type of the patients.  
6

7  
8 *Implications for future research*  
9

10 More evidences need to be generated with respect to the solutions obtained in our review such  
11  
12 as memory tools including the digital solutions, polypills, peer support groups etc. Further  
13  
14 qualitative studies including the subgroup of patients with CVD and DM under different stages  
15  
16 and treatment regimens and are required to contextualize the medication adherence. Exploring  
17  
18 the barriers using theoretical framework with the same methodological approach, can provide  
19  
20 a more reliable evidence to develop patient-centered interventions and achieve better control  
21  
22 among CVD and DM patients.  
23  
24

25  
26 **Ethics and consent:** Not applicable  
27

28  
29 **Funding:** None  
30

31  
32 **Competing interests' statement:** None declared  
33

34  
35 **Acknowledgements:** None  
36

37  
38 **Author contribution statement:** Conceived and designed the study: YK & SR, Data  
39  
40 management and extraction: YK, SR and TR, Analysed the data and wrote the paper: YK, SR,  
41  
42 TR and MT, Provided comments and inputs to revise the manuscript: YK, SR, TR and MT  
43

44  
45 **Data sharing statement:** Data will be available upon reasonable request by investigators  
46

47  
48 **Word count:** 4070 (Being a Qualitative Evidence Synthesis we had to quote regarding the  
49  
50 studies in our results and also we had elaborated the methods in an elaborate manner)  
51  
52  
53  
54  
55  
56  
57  
58  
59  
60

**References:**

1. Walker IF, Garbe F, Wright J, Newell I, Athiraman N, Khan N, et al. The Economic Costs of Cardiovascular Disease, Diabetes Mellitus, and Associated Complications in South Asia: A Systematic Review. *Value Health Reg Issues*. 2018;15:12–26.
2. Glovaci D, Fan W, Wong ND. Epidemiology of Diabetes Mellitus and Cardiovascular Disease. *Curr Cardiol Rep*. 2019;21:21.
3. Prabhakaran D, Jeemon P, Sharma M, Roth GA, Johnson C, Harikrishnan S, et al. The changing patterns of cardiovascular diseases and their risk factors in the states of India: the Global Burden of Disease Study 1990–2016. *Lancet Glob Health*. 2018;6:e1339–51.
4. Tandon N, Anjana RM, Mohan V, Kaur T, Afshin A, Ong K, et al. The increasing burden of diabetes and variations among the states of India: the Global Burden of Disease Study 1990–2016. *Lancet Glob Health*. 2018;6:e1352–62.
5. Durand H, Hayes P, Morrissey EC, Newell J, Casey M, Murphy AW, et al. Medication adherence among patients with apparent treatment-resistant hypertension: systematic review and meta-analysis. *J Hypertens*. 2017;35:2346–57.
6. Polypharmacy and Medication Adherence in Patients With Type 2 Diabetes | Diabetes Care [Internet]. [cited 2020 Jul 30]. Available from: <https://care.diabetesjournals.org/content/26/5/1408.short>
7. Vrijens B, Antoniou S, Burnier M, de la Sierra A, Volpe M. Current Situation of Medication Adherence in Hypertension. *Front Pharmacol* [Internet]. 2017 [cited 2020 Jul 31];8. Available from: <https://www.frontiersin.org/articles/10.3389/fphar.2017.00100/full>

- 1  
2  
3 8. Polonsky WH, Henry RR. Poor medication adherence in type 2 diabetes: recognizing  
4 the scope of the problem and its key contributors. *Patient Prefer Adherence*.  
5 2016;10:1299–307.  
6  
7
- 8  
9  
10 9. Leporini C, De Sarro G, Russo E. Adherence to therapy and adverse drug reactions: is  
11 there a link? *Expert Opin Drug Saf*. 2014;13 Suppl 1:S41-55.  
12  
13
- 14 10. Lam WY, Fresco P. Medication Adherence Measures: An Overview. *BioMed Res Int*.  
15 2015; 2015:1–12.  
16  
17
- 18 11. Kvarnström K, Airaksinen M, Liira H. Barriers and facilitators to medication  
19 adherence: a qualitative study with general practitioners. *BMJ Open*. 2018;8:e015332.  
20  
21
- 22 12. Ferdinand KC, Senatore FF, Clayton-Jeter H, Cryer DR, Lewin JC, Nasser SA, et al.  
23 Improving Medication Adherence in Cardiometabolic Disease. *J Am Coll Cardiol*.  
24 2017;69:437–51.  
25  
26
- 27 13. Krueger KP, Berger BA, Felkey B. Medication adherence and persistence: a  
28 comprehensive review. *Adv Ther*. 2005;22:313–56.  
29  
30
- 31 14. Dennis T, Meera NK, Binny K, Sekhar MS, Kishore G, Sasidharan S. Medication  
32 adherence and associated barriers in hypertension management in India. *CVD*  
33 *Prevention and Control*. 2011 Jan 1;6(1):9-13.  
34  
35
- 36 15. Miller NH, Hill M, Kottke T, Ockene IS. The multilevel compliance challenge:  
37 recommendations for a call to action. A statement for healthcare professionals.  
38 *Circulation*. 1997;95:1085–90.  
39  
40
- 41 16. WHO | ADHERENCE TO LONG-TERM THERAPIES: EVIDENCE FOR ACTION  
42 [Internet]. WHO. World Health Organization; [cited 2020 Jul 30]. Available from:  
43 [http://www.who.int/chp/knowledge/publications/adherence\\_report/en/](http://www.who.int/chp/knowledge/publications/adherence_report/en/)  
44  
45  
46  
47  
48  
49  
50  
51  
52  
53  
54  
55  
56  
57  
58  
59  
60

- 1  
2  
3 17. Aggarwal B, Liao M, Mosca L. Medication Adherence Is Associated with Having a  
4 Caregiver Among Cardiac Patients. *Ann Behav Med Publ Soc Behav Med.*  
5  
6  
7  
8 2013;46:237–42.  
9
- 10 18. Daliri S, Bekker CL, Buurman BM, Scholte op Reimer WJM, van den Bemt BJJ,  
11  
12 Karapinar – Çarkit F. Barriers and facilitators with medication use during the transition  
13  
14 from hospital to home: a qualitative study among patients. *BMC Health Serv Res.* 2019;  
15  
16 19:204.  
17
- 18 19. Tong A, Flemming K, McInnes E, Oliver S, Craig J. Enhancing transparency in  
19  
20 reporting the synthesis of qualitative research: ENTREQ. *BMC Med Res Methodol.*  
21  
22 2012; 12:181  
23  
24  
25
- 26 20. Mohanty A, Kabi A, Mohanty AP. Health problems in healthcare workers: A review.  
27  
28 *Journal of family medicine and primary care.* 2019 Aug;8(8):2568.  
29
- 30 21. Critical Appraisal Skills Programme (2018). CASP (Qualitative) Checklist. [online]  
31  
32 Available at: [https://casp-uk.net/wp-content/uploads/2018/01/CASP-Qualitative-  
33  
34  
35  
36  
37  
38  
39  
40  
41  
42  
43  
44  
45  
46  
47  
48  
49  
50  
51  
52  
53  
54  
55  
56  
57  
58  
59  
60](https://casp-uk.net/wp-content/uploads/2018/01/CASP-Qualitative-Checklist-2018.pdf) Accessed: 12 September 2020
22. Agarwal A, Davies D, Goenka S, Prabhakaran D, Huffman MD, Mohanan PP.  
Facilitators and barriers of heart failure care in Kerala, India: A qualitative analysis of  
healthcare providers and administrators. *Indian Heart J.* 2019; 71(3):235–41.
23. Dhar L. Perceptions of global coronary heart disease risk, and adherence to  
antihypertensive treatment among low income urban women in Delhi, India (Doctoral  
dissertation, Curtin University).
24. George CE, Ramadas D, Norman G, Mukherjee D, Rao T. Barriers to cardiovascular  
disease risk reduction: Does physicians' perspective matter? *Indian Heart J.* 2016;  
68(3):278–85



- 1  
2  
3 25. Gupta S, Dhamija JP, Mohan I, Gupta R. Qualitative Study of Barriers to Adherence to  
4 Antihypertensive Medication among Rural Women in India. *Int J Hypertens.* 2019;  
5 2019:1–7.  
6  
7  
8  
9  
10 26. Gupta S, Virk A, Mittal A, Agarwal B. Patterns and determinants of healthcare-seeking  
11 behavior among hypertensive patients in a rural population of north India: A mixed-  
12 method study. *J Family Med Prim Care.* 2020; 9(6):2830  
13  
14  
15  
16  
17 27. Jayanna K, Swaroop N, Kar A, Ramanaik S, Pati MK, Pujar A, et al. Designing a  
18 comprehensive Non-Communicable Diseases (NCD) programme for hypertension and  
19 diabetes at primary health care level: evidence and experience from urban Karnataka,  
20 South India. *BMC Public Health.* 2019; 19:1  
21  
22  
23  
24  
25  
26 28. Krishnamoorthy Y, Giriappa DK, Eliyas SK, Priyan S, Saya GK, Lakshminarayanan  
27 S. Patient and Provider's Experience and Perspective in Addressing Barriers to  
28 Medication Adherence Among Noncommunicable Disease Patients in Rural  
29 Puducherry, South India—A Qualitative Study. *J Patient Exp.* 2019; 6(3):216–23  
30  
31  
32  
33  
34  
35 29. Kusuma YS. Migrants' Perceptions on Barriers to Treatment Seeking for Hypertension:  
36 A Qualitative Study from Delhi, India. *Studies on Ethno-Medicine.* 2010; 4(3):173–6  
37  
38  
39  
40 30. Miller V, Nambiar L, Saxena M, Leong D, Banerjee A et al. Exploring the barriers to  
41 and facilitators of using evidence-based drugs in the secondary prevention of  
42 cardiovascular diseases: findings from a multistakeholder, qualitative analysis. *Global*  
43 *Heart.* 2018; 13(1):27-34.  
44  
45  
46  
47  
48  
49 31. Newtonraj A, Arun S, Bazroy J, Tovia S. Lay perspectives on causes and complications  
50 of hypertension; and barrier to access health care by known hypertensive patients: a  
51 qualitative study from a rural area of South India. *Int J Community Med Public Health.*  
52 2017; 4(3):704  
53  
54  
55  
56  
57  
58  
59  
60

- 1  
2  
3  
4  
5  
6  
7  
8  
9  
10  
11  
12  
13  
14  
15  
16  
17  
18  
19  
20  
21  
22  
23  
24  
25  
26  
27  
28  
29  
30  
31  
32  
33  
34  
35  
36  
37  
38  
39  
40  
41  
42  
43  
44  
45  
46  
47  
48  
49  
50  
51  
52  
53  
54  
55  
56  
57  
58  
59  
60
32. Nimesh VV, Halder A, Mitra A, Kumar S, Joshi A, Joshi R, et al. Patterns of healthcare seeking behavior among persons with diabetes in Central India: A mixed method study. *J Family Med Prim Care*. 2019; 8(2):677.
  33. Pati S, Van den Akker M, Schellevis FF, Sahoo K, Burgers JS. Managing diabetes mellitus with comorbidities in primary healthcare facilities: a qualitative study among physicians in Odisha, India. 2020. Research square [preprint] doi: 10.21203/rs.3.rs-22272/v1
  34. Anitha Rani M, Shriram V. Are Patients With Type 2 Diabetes Not Aware or Are They Unable to Practice Self-Care? A Qualitative Study in Rural South India. *J Prim Care Community Health*. 2019; 10:2150132719865820.
  35. Salam A, Praveen D, Patel A, Tewari A, Webster R. Barriers and facilitators to the use of cardiovascular fixed-dose combination medication (polypills) in Andhra Pradesh, India: a mixed-methods study. *Global Heart*. 2019; 14(3):303-10.
  36. Satish P, Khetan A, Barbhaya D, Agarwal M, Mohan SK, Josephson R, Webel AR. A qualitative study of facilitators and barriers to cardiovascular risk factor control in a semiurban population in India. *J Family Med Prim Care*. 2019; 8(12):3773-3778.
  37. Thakur JS, Vijayvergiya R, Jaswal N, Ginsburg A. Assessment and barriers to medication adherence for secondary prevention of cardiovascular disease among patients with coronary artery disease in Chandigarh, India. *Int J Non-Commun Dis*. 2016;1:37-41.
  38. Venkatesan M, Dongre AR, Ganapathy K. A community-based study on diabetes medication nonadherence and its risk factors in rural Tamil Nadu. *Indian J Community Med*. 2018; 43(2):72-76

- 1  
2  
3 39. Wood F, Salam A, Singh K, Day S, Jan S, Prabhakaran D, et al. Process evaluation of  
4 the impact and acceptability of a polypill for prevention of cardiovascular disease. *BMJ*  
5 *Open*. 2015; 5(9):e008018  
6  
7  
8  
9  
10 40. Sohal T, Sohal P, King-Shier KM, Khan NA. Barriers and Facilitators for Type-2  
11 Diabetes Management in South Asians: A Systematic Review. *PLoS ONE*. 2015; 10(9):  
12 e0136202.  
13  
14  
15  
16  
17 41. Nam S, Chesla C, Stotts NA, Kroon L, Janson SL. Barriers to diabetes management:  
18 patient and provider factors. *Diabetes Res Clin Pract*. 2011; 93(1):1–9  
19  
20  
21 42. Lipton RB, Losey LM, Giachello A, Mendez J, Girotti MH. Attitudes and issues in  
22 treating Latino patients with type 2 diabetes: views of healthcare providers. *Diabetes*  
23 *Educ*. 1998; 24: 67–71  
24  
25  
26  
27  
28 43. Al Hamid A, Ghaleb M, Aljadhey H, et al. A systematic review of qualitative research  
29 on the contributory factors leading to medicine-related problems from the perspectives  
30 of adult patients with cardiovascular diseases and diabetes mellitus. *BMJ Open* 2014;  
31 4:e005992.  
32  
33  
34  
35  
36  
37  
38 44. Toews I, Booth A, Berg RC et al. Further exploration of dissemination bias in  
39 qualitative research required to facilitate assessment within qualitative evidence  
40 synthesis. *J Clin Epidemiol* 2017; 88:133–139  
41  
42  
43  
44  
45  
46  
47  
48  
49  
50  
51  
52  
53  
54  
55  
56  
57  
58  
59  
60

**Table 1: Characteristics of the studies included (N=18)**

| S.No | Author and year           | State      | Data collection method | Study participants                                                 | Study setting   | Approach    | Coding    | Theoretical framework used | Method of analysis      | Sample size         | Mean Age in years             | Study quality |
|------|---------------------------|------------|------------------------|--------------------------------------------------------------------|-----------------|-------------|-----------|----------------------------|-------------------------|---------------------|-------------------------------|---------------|
| 1.   | Agarwal 2019              | Kerala     | IDI                    | Clinical and administrative staff                                  | Facility based  | NR          | Inductive | NR                         | Dedoose Software        | 21                  | NR                            | ***           |
| 2.   | Dhar et al 2016           | Delhi      | IDI                    | Hypertensive women aged 35-59 years                                | Community based | NR          | Inductive | Yes                        | Manual content analysis | 30                  | 48                            | ***           |
| 3.   | George et al 2016         | Karnataka  | IDI                    | Physicians providing Non communicable disease care                 | Community based | NR          | Inductive | NR                         | Manual content analysis | 36                  | 46                            | ***           |
| 4.   | Gupta et al 2019          | Rajasthan  | IDI                    | Hypertensive women                                                 | Facility based  | NR          | NR        | NR                         | Manual content analysis | 30                  | 56                            | **            |
| 5.   | Gupta et al 2020          | Haryana    | IDI                    | Hypertension patients                                              | Facility based  | NR          | NR        | NR                         | Manual content analysis | 100                 | 38-76                         | ***           |
| 6.   | Jayanna et al 2019        | Karnataka  | IDI & FGD              | Diabetes and Hypertension patients                                 | Facility based  | NR          | NR        | Yes                        | Manual content analysis | 10 IDI + 20 FGDs    | NR                            | ***           |
| 7.   | Krishnamoorthy et al 2018 | Puducherry | IDI & KII              | Diabetes and Hypertension patients & Healthcare workers            | Community based | NR          | Inductive | NR                         | Manual content analysis | 6 IDI + 4 KII       | NR                            | ***           |
| 8.   | Kusuma et al 2010         | Delhi      | KII & FGD              | Recent and Settled Migrants having hypertension inhabited in Delhi | Community based | NR          | NR        | NR                         | Manual content analysis | 14 (KII) + 20 (FGD) | 38 – 50 (KII) & 25 – 40 (FGD) | ***           |
| 9.   | Miller et al 2017         | Delhi      | IDI                    | Cardiovascular disease patients                                    | Trial based     | Descriptive | NR        | NR                         | Manual content analysis | 14                  | NR                            | ***           |
| 10.  | Newtonraj et al 2017      | Tamil Nadu | Personal interviews    | Hypertensive patients                                              | Community based | NR          | NR        | NR                         | Manual content analysis | 40                  | NR                            | **            |

|     |                       |                     |           |                                            |                 |             |           |     |                           |    |    |     |
|-----|-----------------------|---------------------|-----------|--------------------------------------------|-----------------|-------------|-----------|-----|---------------------------|----|----|-----|
| 11. | Nimesh et al 2019     | Madhya Pradesh      | IDI       | Individuals with diabetes                  | Community based | NR          | Inductive | Yes | Manual content analysis   | 60 | 52 | *** |
| 12. | Patti et al 2020      | Orissa              | IDI       | Primary care physicians                    | Facility based  | NR          | NR        | NR  | Manual content analysis   | 17 | 40 | *** |
| 13. | Rani et al 2019       | Tamil Nadu          | FGD       | Individuals with diabetes                  | Community based | Descriptive | NR        | NR  | Manual content analysis   | 50 | 50 | **  |
| 14. | Salaam et al 2019     | Andhra Pradesh      | IDI       | Patients with Cardiovascular disease       | Community based | NR          | NR        | Yes | NVivo version 11 software | 12 | 62 | *** |
| 15. | Satish et al 2019     | West Bengal         | FGD       | Patients with hypertension and/or diabetes | Trial based     | NR          | NR        | Yes | Manual content analysis   | 70 | 53 | *** |
| 16. | Thakur et al 2016     | Chandigarh          | IDI & FGD | Coronary artery disease patients           | Facility based  | NR          | NR        | NR  | Manual Thematic analysis  | 20 | NR | *   |
| 17. | Venkatesan et al 2018 | Tamil Nadu          | IDI       | Health care workers                        | Community based | NR          | NR        | NR  | Anthropac software        | 10 | NR | *** |
| 18. | Wood et al 2015       | Hyderabad and Delhi | IDI       | Patients with Cardiovascular diseases      | Trial based     | NR          | NR        | Yes | Nvivo software            | 52 | 57 | *** |

NR – Not Reported

IDI – In depth Interview

FGD – Focussed Group Discussion

KII – Key informant interview

Table 2: Thematic framework analysis for summarizing barriers in medication adherence experienced by CVD &amp; DM patients in India

| Main theme/Sub-themes                                                                                 | Barriers in Medication Adherence                                                                                                                                              | Studies                                                                                                                                                                                                                      |
|-------------------------------------------------------------------------------------------------------|-------------------------------------------------------------------------------------------------------------------------------------------------------------------------------|------------------------------------------------------------------------------------------------------------------------------------------------------------------------------------------------------------------------------|
| <b>PATIENTS</b>                                                                                       | <b>1. Lack of awareness/knowledge:</b> Lack of knowledge and understanding about the disease, its complications and treatment among the patients                              | <b>Dhar et al 2016, George et al 2016, Gupta et al 2019, Krishnamoorthy et al 2018, Kusuma et al 2010, Newtonraj et al 2017, Patti et al 2020, Tan et al 2017, Thakur et al 2016, Venkatesan et al 2018, Wood et al 2015</b> |
|                                                                                                       | <b>2. Forgetfulness:</b> Patients forget to take medicine because of busy schedule                                                                                            | <b>Dhar et al 2016, Gupta et al 2019, Gupta et al 2020, Rani et al 2019, Venkatesan et al 2018, Wood et al 2015, Tan et al 2017, Thakur et al 2016</b>                                                                       |
|                                                                                                       | <b>3. Misconception about medications:</b> Patient has wrong perception about the medications, especially about its side effects and quality                                  | <b>George et al 2016, Gupta et al 2020, Patti et al 2020, Rani et al 2019, Salaam et al 2019, Tan et al 2017, Venkatesan et al 2018</b>                                                                                      |
|                                                                                                       | <b>4. Preference to alternate system of medicine:</b> Patients prefers taking herbal and other alternate system of medicines for their condition                              | <b>George et al 2016, Tan et al 2017, Venkatesan et al 2018</b>                                                                                                                                                              |
|                                                                                                       | <b>5. Ill effects of substance abuse:</b> Patients have difficulty in adhering to medications during the bout of tobacco or alcohol consumption                               | <b>Jayanna et al 2019, Krishnamoorthy et al 2018</b>                                                                                                                                                                         |
|                                                                                                       | <b>6. Effect of side effects:</b> Patients stop their medication once they develop side effects related to the drugs                                                          | <b>Venkatesan et al 2018, Wood et al 2015</b>                                                                                                                                                                                |
|                                                                                                       | <b>7. Stress:</b> Patients developing stress due to personal or work-related problems are more non-adherent to medications                                                    | <b>Krishnamoorthy et al 2018</b>                                                                                                                                                                                             |
|                                                                                                       | <b>8. Stigma:</b> Patients feel stigmatised in revealing their disease status to other family/friends leading to lack of support from them                                    | <b>Krishnamoorthy et al 2018</b>                                                                                                                                                                                             |
| <b>CARE TEAM<br/>(Frontline care providers - Healthcare professionals, family members and others)</b> | <b>1. Family support:</b> Lack of physical, emotional and social support as the family members are pre-occupied with domestic works, crisis, other priorities and commitments | <b>Dhar et al 2016, George et al 2016, Gupta et al 2020, Krishnamoorthy et al 2018, Kusuma et al 2010, Newtonraj et al 2017, Rani et al 2019, Wood et al 2015</b>                                                            |
|                                                                                                       | <b>2. Risk communication:</b> Poor risk communication or counselling to patients and family members about non-adherence to medication by the treating physicians              | <b>Dhar et al 2016, George et al 2016, Gupta et al 2019, Krishnamoorthy et al 2018, Miller et al 2017, Thakur et al 2016</b>                                                                                                 |
|                                                                                                       | <b>3. Physician attitude:</b> Lack of respect, empathy, communication and attention towards patients by the treating physicians                                               | <b>Dhar et al 2016, Gupta et al 2019, Kusuma et al 2010, Jayanna et al 2019</b>                                                                                                                                              |

|                                                               |                                                                                                                                                                                                                                                 |                                                                                                                                                                                                                                                                                 |
|---------------------------------------------------------------|-------------------------------------------------------------------------------------------------------------------------------------------------------------------------------------------------------------------------------------------------|---------------------------------------------------------------------------------------------------------------------------------------------------------------------------------------------------------------------------------------------------------------------------------|
| <b>HEALTHCARE ORGANIZATION<br/>(Infrastructure/Resources)</b> | <b>1. Affordability:</b> Patients lose their daily wages due to inconvenient consultation timings in public facilities, which is aggravated by travel costs due to poor access, and higher medication costs while preferring private facilities | <b>Agarwal et al 2019, Dhar et al 2016, George et al 2016, Gupta et al 2019, Gupta et al 2020, Jayanna et al 2019, Kusuma et al 2010, Miller et al 2017, Nimesh et al 2019, Salaam et al 2019, Satish et al 2019, Thakur et al 2016, Venkatesan et al 2018, Wood et al 2015</b> |
|                                                               | <b>2. Accessibility:</b> Lack of access to healthcare facilities (more distance) requiring longer travel and waiting time.                                                                                                                      | <b>Dhar et al 2016, George et al 2016, Gupta et al 2019, Gupta et al 2020, Jayanna et al 2019, Krishnamoorthy et al 2018, Kusuma et al 2010, Miller et al 2017, Newtonraj et al 2017, Tan et al 2017, Thakur et al 2016, Venkatesan et al 2018, Wood et al 2015</b>             |
|                                                               | <b>3. Availability:</b> Non-availability of essential medicines in public healthcare facilities                                                                                                                                                 | <b>Dhar et al 2016, Jayanna et al 2019, Kusuma et al 2010, Miller et al 2017, Newtonraj et al 2017, Patti et al 2020, Salaam et al 2019, Wood et al 2015</b>                                                                                                                    |
|                                                               | <b>4. Acceptability:</b> Medications from public health facilities are not acceptable to the patients due to poorer quality                                                                                                                     |                                                                                                                                                                                                                                                                                 |
|                                                               | <b>5. Overburdening of primary health centres:</b> Burdening of primary health facilities lead to time constraints in patient counselling regarding medication adherence                                                                        | <b>Jayanna et al 2019, Krishnamoorthy et al 2018, Miller et al 2017, Patti et al 2020, Venkatesan et al 2018</b>                                                                                                                                                                |

Table 3: Thematic framework for summarizing facilitators in medication adherence experienced by CVD &amp; DM patients in India

| Main theme/Sub-themes                                                                                 | Facilitators in Medication Adherence                                                                                                                                                                                                                    | Studies                                                                                                                   |
|-------------------------------------------------------------------------------------------------------|---------------------------------------------------------------------------------------------------------------------------------------------------------------------------------------------------------------------------------------------------------|---------------------------------------------------------------------------------------------------------------------------|
| <b>PATIENTS</b>                                                                                       | <b>1. Self-awareness and fear:</b> Patient's understanding about medicine adherence and fear about complications of non-adherence keeps them healthy                                                                                                    | <b>Krishnamoorthy et al 2018, Miller et al 2017, Patti et al 2020, Satish et al 2019, Tan et al 2017, Wood et al 2015</b> |
|                                                                                                       | <b>2. Medicine Reminder system:</b> Separate pill boxes/cases/covers, personalized shelf, and maintaining drug record notebook helps them in remembering daily doses                                                                                    | <b>Dhar et al 2016, Krishnamoorthy et al 2018, Miller et al 2017, Tan et al 2017</b>                                      |
|                                                                                                       | <b>3. Integrating drug intake with the daily routine:</b> Fixed time for medicine intake, separate place for keeping drug, and making arrangements during travel helps them in adherence                                                                | <b>Dhar et al 2016, Krishnamoorthy et al 2018</b>                                                                         |
|                                                                                                       | <b>4. Positive peer influence:</b> Good adherence to medication by the patient's peers motivates the patient to be compliance to their own drug intake                                                                                                  | <b>Gupta et al 2019, Krishnamoorthy et al 2018</b>                                                                        |
| <b>CARE TEAM<br/>(Frontline care providers - Healthcare professionals, family members and others)</b> | <b>1. Family support:</b> Constant reminders by family members for drug intake                                                                                                                                                                          | <b>Dhar et al 2016, Gupta et al 2020, Krishnamoorthy et al 2018, Miller et al 2017, Wood et al 2015</b>                   |
|                                                                                                       | <b>2. Past adverse experiences:</b> Death of patients' own family members due to complications of the condition has motivated them to adhere to medication                                                                                              | <b>Dhar et al 2016, Krishnamoorthy et al 2018</b>                                                                         |
|                                                                                                       | <b>3. Healthcare provider counselling and empathy:</b> Patients described that counselling from their healthcare providers has motivated them to remain adherent                                                                                        | <b>Kusuma et al 2010, Miller et al 2017, Patti et al 2020, Salaam et al 2019, Tan et al 2017</b>                          |
|                                                                                                       | <b>4. Trust in physician:</b> Adherence is more when a positive rapport and trust is established between the patient and health care providers.                                                                                                         | <b>Dhar et al 2016, Krishnamoorthy et al 2018, Satish et al 2019</b>                                                      |
| <b>HEALTHCARE ORGANIZATION<br/>(Infrastructure/Resources)</b>                                         | <b>1. Dedicated pill boxes/covers:</b> Provision of different medications in separate boxes/covers in the healthcare facility has helped as the patient to remember which medication to take at what time                                               | <b>Krishnamoorthy et al 2018, Wood et al 2015</b>                                                                         |
|                                                                                                       | <b>2. Combination drugs (polypills):</b> Polypills had the following advantages to facilitate the medication adherence: a smaller number of pills, lower frequency, less chance of forgetting, potential for lower cost, and convenient simpler regimen | <b>Salaam et al 2019, Wood et al 2015</b>                                                                                 |
|                                                                                                       | <b>3. Availability of medications:</b> Proper pharmacy inventory control and stock delivery has aided in medication adherence                                                                                                                           | <b>Miller et al 2017</b>                                                                                                  |
| <b>ENVIRONMENT<br/>(Regulatory, market and policy framework)</b>                                      | <b>1. NGO Support:</b> Patients has reported that sharing their concerns and receiving counselling from NGO/ Health officers acted as a facilitator for drug intake                                                                                     | <b>Tan et al 2017, Wood et al 2015</b>                                                                                    |



**Table 4: Thematic framework for summarizing suggestions to improve medication adherence among CVD & DM patients in India**

| Main theme/Sub-themes                                                                                         | Suggestions to improve medication adherence                                                                                                                                                                                                                                                                                                       | Studies                                                                                                                                                                                                         |
|---------------------------------------------------------------------------------------------------------------|---------------------------------------------------------------------------------------------------------------------------------------------------------------------------------------------------------------------------------------------------------------------------------------------------------------------------------------------------|-----------------------------------------------------------------------------------------------------------------------------------------------------------------------------------------------------------------|
| <b>PATIENTS</b>                                                                                               | <b>1. Peer support groups:</b> Patients can motivate each other by forming support groups among themselves                                                                                                                                                                                                                                        | <b>Krishnamoorthy et al 2018</b>                                                                                                                                                                                |
|                                                                                                               | <b>2. Digital reminder system:</b> Patient can use digital reminders such as watch, mobile phone to adhere to their drug schedule                                                                                                                                                                                                                 | <b>Krishnamoorthy et al 2018, Miller et al 2017</b>                                                                                                                                                             |
| <b>CARE TEAM<br/>(Frontline care providers -<br/>Healthcare professionals,<br/>family members and others)</b> | <b>1. Social support:</b> Family members can be educated and asked to provide support by reinforcing compliance, reminding about drug intake, motivating them patients to avoid substance abuse                                                                                                                                                   | <b>Agarwal et al 2019, Dhar et al 2016, Krishnamoorthy et al 2018, Nimesh et al 2019, Wood et al 2015</b>                                                                                                       |
|                                                                                                               | <b>2. Financial support:</b> Family members can provide financial support to cover the cost of medications, travel etc.                                                                                                                                                                                                                           | <b>Gupta et al 2019</b>                                                                                                                                                                                         |
|                                                                                                               | <b>3. Regular training of healthcare workers:</b> Physicians and other healthcare workers involved in prescribing drugs and counselling should undergo regular training on standard treatment protocols                                                                                                                                           | <b>George et al 2016, Jayanna et al 2019, Miller et al 2017, Patti et al 2020, Satish et al 2019</b>                                                                                                            |
|                                                                                                               | <b>4. Team work approach:</b> Integration of AYUSH, mental health counsellors, physiotherapist and geriatric clinics at primary healthcare level                                                                                                                                                                                                  | <b>George et al 2016, Miller et al 2017, Patti et al 2020</b>                                                                                                                                                   |
| <b>HEALTHCARE ORGANIZATION<br/>(Infrastructure/Resources)</b>                                                 | <b>1. Innovations in patient care:</b> Healthcare workers can make innovations like dedicated day for specific conditions (diabetes day, etc), dedicated counselling station/session with additional staff for detailing the importance of adherence and complications related to non-adherence, unique pill dispensing mechanism (colour coding) | <b>Agarwal et al 2019, Dhar et al 2016, Jayanna et al 2019, Krishnamoorthy et al 2018, Miller et al 2017, Newtonraj et al 2017, Patti et al 2020, Satish et al 2019, Venkatesan et al 2018, Wood et al 2015</b> |
|                                                                                                               | <b>2. IEC/BCC/Awareness campaigns:</b> Putting up of IEC materials and conducting campaigns on importance of adherence in public places and workplaces                                                                                                                                                                                            | <b>Dhar et al 2016, George et al 2016, Gupta et al 2019, Gupta et al 2020, Jayanna et al 2019, Krishnamoorthy et al 2018, Newtonraj et al 2017, Patti et al 2020, Rani et al 2019</b>                           |
|                                                                                                               | <b>3. Digitalizing patient treatment record:</b> Digitalizing a dedicated treatment record for each patient can help in better follow-up of the patient and improve adherence                                                                                                                                                                     | <b>Jayanna et al 2019, Miller et al 2017, Patti et al 2020, Satish et al 2019, Wood et al 2015</b>                                                                                                              |
|                                                                                                               | <b>4. Polypills:</b> Disseminating the advantages of polypills to healthcare professionals by CME/conferences and patients by public education campaigns; Integration of polypills into clinical practice. etc                                                                                                                                    | <b>Salaam et al 2019, Wood et al 2015</b>                                                                                                                                                                       |
| <b>ENVIRONMENT<br/>(Regulatory, market and policy framework)</b>                                              | <b>1. Linkage of health services with NGO and community-based organizations:</b> Community members, volunteers, anganwadi workers, self-help groups and NGO workers can be trained in counselling the patients to improve medication adherence                                                                                                    | <b>Dhar et al 2016, Jayanna et al 2019, Krishnamoorthy et al 2018, Kusuma et al 2010, Miller et al 2017, Tan et al 2017</b>                                                                                     |

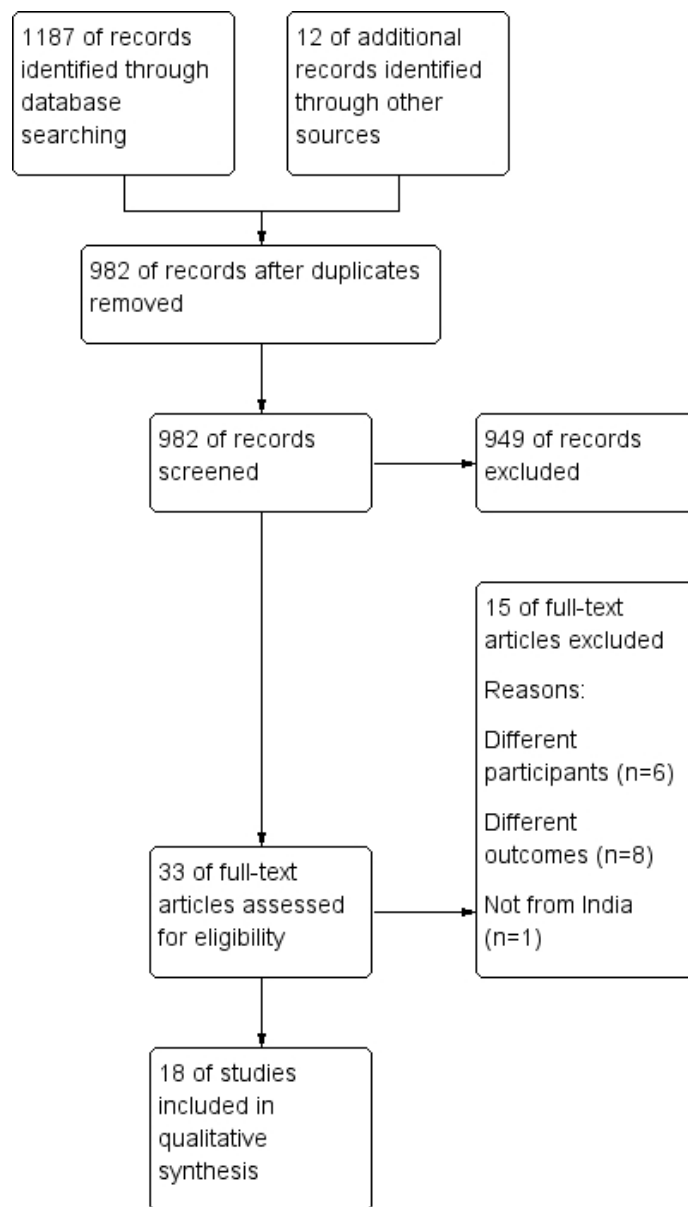

141x246mm (72 x 72 DPI)

**Supplementary Table 1 Search strategy**

| <b>Key word</b>                      | <b>Alternative word</b>                                                                                                                                                                                                                                                                                                                                                                                                                                                                                                                                                     |
|--------------------------------------|-----------------------------------------------------------------------------------------------------------------------------------------------------------------------------------------------------------------------------------------------------------------------------------------------------------------------------------------------------------------------------------------------------------------------------------------------------------------------------------------------------------------------------------------------------------------------------|
| Qualitative studies                  | ((((((((Qualitative Research[MeSH Terms]) OR Focus Groups[MeSH Terms]) OR Anthropology, Cultural[MeSH Terms]) OR Ethnopsychology[MeSH Terms]) OR Grounded Theory[MeSH Terms]) OR Nursing Methodology Research[MeSH Terms]) OR Narrative Medicine[MeSH Terms]) OR Tape Recording[MeSH Terms]) OR Culture[MeSH Terms]) OR Attitude[MeSH Terms] Case studies OR Focused group discussions OR phenomenological studies OR ethnographic studies OR interviews))                                                                                                                  |
| Medication Adherence                 | ((((((((((((((((Medication Adherence[MeSH Terms]) OR Patient Compliance[MeSH Terms]) OR No-Show Patients[MeSH Terms]) OR Health Personnel[MeSH Terms]) OR drug effects [Subheading]) OR (Treatment Adherence[MeSH Terms] OR Compliance[MeSH Terms])) OR Self Medication[MeSH Terms]) OR Self Administration[MeSH Terms]) OR Patient Medication Knowledge[MeSH Terms]) OR Attitude to Health[MeSH Terms]) OR Patient Acceptance of Health Care[MeSH Terms])) OR Patient Preference[MeSH Terms]) OR Patient Acceptance of Health Care[MeSH Terms]) OR Motivation[MeSH Terms]) |
| Barriers, Facilitators and solutions | Challenges OR Challenge OR Problem OR Problems barriers OR Difficulties OR Issues OR Limitations OR Obstacles OR Facilitators OR Suggestions OR Solutions                                                                                                                                                                                                                                                                                                                                                                                                                   |
| Diabetes mellitus and CVDs           | ((((((Diabetes Mellitus[MeSH Terms]) OR Cardiovascular Diseases[MeSH Terms] OR Hypertension[MeSH Terms] OR Coronary Disease[MeSH Terms] OR Coronary Artery Disease[MeSH Terms] OR Heart Diseases[MeSH Terms] OR Cerebrovascular Diseases[MeSH Terms] OR Stroke[MeSH Terms]))                                                                                                                                                                                                                                                                                                |

|       |                                                       |
|-------|-------------------------------------------------------|
| India | (India[MeSH Terms] OR Republic of India[MeSH Terms])) |
|-------|-------------------------------------------------------|

### Search results (PubMed):

(((((Diabetes Mellitus[MeSH Terms]) OR Cardiovascular Diseases[MeSH Terms] OR Hypertension[MeSH Terms])) AND (((((((((((((((Medication Adherence[MeSH Terms]) OR Patient Compliance[MeSH Terms]) OR No-Show Patients[MeSH Terms]) OR Health Personnel[MeSH Terms]) OR drug effects [Subheading]) OR (Treatment Adherence[MeSH Terms] OR Compliance[MeSH Terms])) OR Self Medication[MeSH Terms]) OR Self Administration[MeSH Terms]) OR Patient Medication Knowledge[MeSH Terms]) OR Attitude to Health[MeSH Terms]) OR Patient Acceptance of Health Care[MeSH Terms])) OR Patient Preference[MeSH Terms]) OR Patient Acceptance of Health Care[MeSH Terms]) OR Motivation[MeSH Terms]) OR Life Change Events[MeSH Terms]) OR Trust[MeSH Terms]))) AND (((((((((((Qualitative Research[MeSH Terms]) OR Focus Groups[MeSH Terms]) OR Anthropology, Cultural[MeSH Terms]) OR Ethnopsychology[MeSH Terms]) OR Grounded Theory[MeSH Terms]) OR Nursing Methodology Research[MeSH Terms]) OR Narrative Medicine[MeSH Terms]) OR Tape Recording[MeSH Terms]) OR Culture[MeSH Terms]) OR Attitude[MeSH Terms])) AND (India[MeSH Terms] OR Republic of India[MeSH Terms])) – 199 (Filters: Years between 2010 and 2020 and English language publication)

((((((((((((((Qualitative Research[MeSH Terms]) OR Focus Groups[MeSH Terms]) OR Anthropology, Cultural[MeSH Terms]) OR Ethnopsychology[MeSH Terms]) OR Grounded Theory[MeSH Terms]) OR Nursing Methodology Research[MeSH Terms]) OR Narrative Medicine[MeSH Terms]) OR Tape Recording[MeSH Terms]) OR Culture[MeSH Terms]) OR Attitude[MeSH Terms] Case studies OR Focused group discussions OR phenomenological studies OR ethnographic studies OR interviews))) AND (((((((((((((((Medication Adherence[MeSH Terms]) OR Patient Compliance[MeSH Terms]) OR No-Show Patients[MeSH Terms]) OR Health Personnel[MeSH Terms]) OR drug effects [Subheading]) OR (Treatment Adherence[MeSH Terms] OR Compliance[MeSH Terms])) OR Self Medication[MeSH Terms]) OR Self Administration[MeSH Terms]) OR Patient Medication Knowledge[MeSH Terms]) OR Attitude to Health[MeSH Terms]) OR Patient Acceptance of Health Care[MeSH Terms])) OR Patient Preference[MeSH Terms]) OR Patient Acceptance of Health Care[MeSH Terms]) OR Motivation[MeSH Terms])) AND (Challenges OR Challenge OR Problem OR Problems barriers OR Difficulties OR Issues OR Limitations OR Obstacles OR Facilitators OR Suggestions OR Solutions)) AND ((((((Diabetes Mellitus[MeSH Terms]) OR Cardiovascular Diseases[MeSH Terms] OR Hypertension[MeSH Terms] OR Coronary Disease[MeSH Terms] OR Coronary Artery Disease[MeSH Terms] OR Heart Diseases[MeSH Terms] OR Cerebrovascular Diseases[MeSH Terms] OR Stroke[MeSH Terms]))) AND ((India[MeSH Terms] OR Republic of India[MeSH Terms])) – 31 results (Filters: Years between 2010 and 2020 and English language publication)

**Google scholar:** 635 + 22 + 6 + 12 = 675

1  
2  
3 **ScienceDirect:** (Diabetes Mellitus OR Cardiovascular Diseases OR Hypertension) AND  
4 (Qualitative Study OR Qualitative) AND (India) AND (Adherence) – 238 articles  
5

6 **Cochrane library:** (Diabetes Mellitus OR Cardiovascular Diseases OR Hypertension) AND  
7 (Qualitative Study OR Qualitative) AND (India) AND (Adherence) – 34 articles  
8  
9  
10  
11  
12  
13  
14  
15  
16  
17  
18  
19  
20  
21  
22  
23  
24  
25  
26  
27  
28  
29  
30  
31  
32  
33  
34  
35  
36  
37  
38  
39  
40  
41  
42  
43  
44  
45  
46  
47  
48  
49  
50  
51  
52  
53  
54  
55  
56  
57  
58  
59  
60

For peer review only

# BMJ Open

**Patient and Provider's perspective on barriers and facilitators for medication adherence among adult patients with Cardiovascular Diseases and Diabetes Mellitus in India – A qualitative evidence synthesis**

|                                 |                                                                                                                                                                                                                      |
|---------------------------------|----------------------------------------------------------------------------------------------------------------------------------------------------------------------------------------------------------------------|
| Journal:                        | <i>BMJ Open</i>                                                                                                                                                                                                      |
| Manuscript ID                   | bmjopen-2021-055226.R1                                                                                                                                                                                               |
| Article Type:                   | Original research                                                                                                                                                                                                    |
| Date Submitted by the Author:   | 10-Dec-2021                                                                                                                                                                                                          |
| Complete List of Authors:       | Krishnamoorthy, Yuvaraj; JIPMER PSM, Rajaa, Sathish; Jawaharlal Institute of Postgraduate Medical Education, Rehman, Tanveer; PGIMER Thulasingam, Mahalakshmi ; JIPMER, Department of Preventive and Social Medicine |
| <b>Primary Subject Heading</b>: | Diabetes and endocrinology                                                                                                                                                                                           |
| Secondary Subject Heading:      | Cardiovascular medicine, Diabetes and endocrinology                                                                                                                                                                  |
| Keywords:                       | QUALITATIVE RESEARCH, PREVENTIVE MEDICINE, PRIMARY CARE, Coronary heart disease < CARDIOLOGY, DIABETES & ENDOCRINOLOGY                                                                                               |
|                                 |                                                                                                                                                                                                                      |

SCHOLARONE™  
Manuscripts



I, the Submitting Author has the right to grant and does grant on behalf of all authors of the Work (as defined in the below author licence), an exclusive licence and/or a non-exclusive licence for contributions from authors who are: i) UK Crown employees; ii) where BMJ has agreed a CC-BY licence shall apply, and/or iii) in accordance with the terms applicable for US Federal Government officers or employees acting as part of their official duties; on a worldwide, perpetual, irrevocable, royalty-free basis to BMJ Publishing Group Ltd ("BMJ") its licensees and where the relevant Journal is co-owned by BMJ to the co-owners of the Journal, to publish the Work in this journal and any other BMJ products and to exploit all rights, as set out in our [licence](#).

The Submitting Author accepts and understands that any supply made under these terms is made by BMJ to the Submitting Author unless you are acting as an employee on behalf of your employer or a postgraduate student of an affiliated institution which is paying any applicable article publishing charge ("APC") for Open Access articles. Where the Submitting Author wishes to make the Work available on an Open Access basis (and intends to pay the relevant APC), the terms of reuse of such Open Access shall be governed by a Creative Commons licence – details of these licences and which [Creative Commons](#) licence will apply to this Work are set out in our licence referred to above.

Other than as permitted in any relevant BMJ Author's Self Archiving Policies, I confirm this Work has not been accepted for publication elsewhere, is not being considered for publication elsewhere and does not duplicate material already published. I confirm all authors consent to publication of this Work and authorise the granting of this licence.

1  
2  
3 1 **Patient and Provider's perspective on barriers and facilitators for medication adherence**  
4  
5 2 **among adult patients with Cardiovascular Diseases and Diabetes Mellitus in India – A**  
6  
7 3 **qualitative evidence synthesis**

8  
9  
10 4 **Running head:** Barriers and facilitators for medication adherence among CVD and DM  
11  
12 5 patients in India

13  
14  
15 6 **Article category:** Systematic Review

16  
17 7 **Yuvaraj Krishnamoorthy<sup>1</sup>, Sathish Rajaa<sup>2</sup>, Tanveer Rehman<sup>3</sup>, Mahalakshmy**  
18  
19 8 **Thulasingam<sup>4</sup>**

20  
21 9 <sup>1</sup>Assistant Professor, Department of Community Medicine, ESIC Medical College & PGIMSR,  
22  
23  
24 10 K.K. Nagar, Chennai, India;

25  
26 11 **Contact Number:** +91 9551892665

27  
28 12 **Email id:** [yuvi.1130@gmail.com](mailto:yuvi.1130@gmail.com)

29  
30  
31 13 <sup>2</sup>Assistant Professor, Department of Community Medicine, ESIC Medical College & PGIMSR,  
32  
33 14 K.K. Nagar, Chennai, India;

34  
35 15 **Contact Number:** +91 9791974633

36  
37 16 **Email id:** [psrajaa2410@gmail.com](mailto:psrajaa2410@gmail.com)

38  
39  
40 17 <sup>3</sup>Independent Author, Kolkata, West Bengal, India

41  
42 18 **Contact Number:** +91 8336922482

43  
44 19 **Email id:** [drtanveerrehman@gmail.com](mailto:drtanveerrehman@gmail.com)

45  
46  
47 20 <sup>4</sup>Associate Professor, Department of Preventive and Social Medicine, Jawaharlal Institute of of  
48  
49 21 Postgraduate Medical Education and Research (JIPMER), Puducherry - 605006, India;

50  
51 22 **Contact Number:** +91 9488729774

52  
53 23 **Email id:** [mahalakshmi.dr@gmail.com](mailto:mahalakshmi.dr@gmail.com)

54  
55  
56 24 **Corresponding Author:**

57  
58 25 Dr Sathish Rajaa,



1  
2  
3 1 Assistant Professor,  
4  
5 2 Department of Community Medicine,  
6  
7 3 ESIC Medical College & PGIMSR, K.K. Nagar, Chennai, India

8  
9  
10 4 **Contact Number:** +91 9791974633

11  
12 5 **Email id:** psrajaa2410@gmail.com

13  
14  
15 6 **Key messages:**

- 16  
17 7 • This is the first review exploring factors associated with drug adherence among CVD  
18 & DM patients in India  
19  
20 8  
21 9 • Patient-related barriers were lack of knowledge about their condition, forgetfulness,  
22 stigma and stress  
23  
24 10  
25 11 • Care team-related barriers were lack of family support, risk communication and  
26 physician attitude  
27  
28 12  
29 13 • Health system-related barriers were accessibility, affordability, availability and  
30 acceptability  
31  
32 14  
33 15 • Solutions to address these barriers were peer support group, digital reminders and  
34 innovations in patient care  
35  
36 16  
37  
38  
39  
40

41 17 **Abstract:**

42  
43 18 **Objective:**

44  
45  
46 19 To explore the various stakeholders' perspectives on barriers and facilitators for medication  
47 adherence among CVD and DM patients in India.

48  
49  
50 21 **Methods:**

51  
52 22 A comprehensive systematic search was conducted in Medline, Cochrane library, Science  
53 Direct and Google Scholar from January 2010 to July 2020. We used the framework of the  
54 systems approach for healthcare delivery to conduct thematic analysis, using published  
55 23  
56 24  
57 25 qualitative literature to derive relevant themes, sub-themes and codes.

1 **Setting:** A Qualitative Evidence Synthesis of qualitative published studies from India

2 **Subjects:** A Qualitative Evidence Synthesis of the available qualitative evidence on the  
3 barriers and facilitating factors for medication adherence among CVD and DM patients in India

4 **Results:**

5 In total, 18 studies were included. Major barriers reported were lack of understanding about  
6 the disease, complications related to non-adherence, followed by forgetfulness, lack of family  
7 support and risk communication. Health system-related barriers such as accessibility,  
8 affordability, and acceptability were also reported by majority of the studies. Creation of peer  
9 support group, digital reminder system, integration of AYUSH, mental health, physiotherapy  
10 and geriatric clinics at primary healthcare level and innovations in patient care were suggested  
11 to counter these barriers in medication adherence.

12 **Conclusion:**

13 Such patient-specific targeted interventions needs to be developed to achieve better control  
14 among CVD and DM patients.

15 **Keywords:** Cardiovascular Diseases, Diabetes Mellitus, Medication Adherence, Qualitative  
16 Research

17

## 1 INTRODUCTION

2 Cardiovascular diseases (CVDs) are the leading cause of mortality globally and in India.<sup>1,2</sup>  
3 More than a quarter (28%) of all deaths in India are attributable to CVDs with Ischemic heart  
4 disease (IHD) and stroke constituting the majority (83%).<sup>3</sup> On the other hand, India ranks  
5 second after China in the global diabetes epidemic, with a prevalence of around 10%.<sup>4</sup> Both  
6 diabetes mellitus (DM) and hypertension have long been recognized as independent risk factors  
7 for CVDs, whereas adherence to prescribed hypoglycaemic and antihypertensive drug  
8 therapies have significantly reduced the risk.<sup>5-8</sup> At least half of hypertensive & DM patients  
9 stop taking their medication within a year, often without informing their provider. With further  
10 non adherence and attrition over time, medication adherence has emerged as a significant  
11 public health priority.<sup>9</sup>

12 Medication adherence is defined as the extent to which a person's behaviour coincides with the  
13 agreed medication regimen or health advice from a health care provider.<sup>10</sup> It has three  
14 components: initiation (when the patient takes the first dose of prescribed medication),  
15 implementation (the extent to which a patient's actual dosing corresponds to the prescribed  
16 dosing regimen), and discontinuation (when no more doses are taken after that).<sup>11</sup> Medication  
17 adherence is of growing interest to clinicians, healthcare systems, and other stakeholders (e.g.,  
18 payers). There is soaring evidence that establishes nonadherence is often associated with lower  
19 quality of life, adverse clinical events, increased need for medical interventions, mortality, and  
20 thus giving rise to avoidable out-of-pocket expenditure in health.<sup>12</sup> Non-adherent hypertensive  
21 and stable coronary heart disease (CHD) patients have a four to five times higher risk of  
22 developing CHD and death, when compared to adherent patients.<sup>13,14</sup> Similarly, the likelihood  
23 of hospitalization is doubled among DM & hypertensive patients who are non-adherent to  
24 prescribed therapies compared to the general population. Despite recent advancements in  
25 pharmacologic treatment and technology to treat and monitor DM and CVD patients,

1 medication adherence is of particular concern in low-and-middle-income countries (LMIC)  
2 like India, where accessibility and affordability are still issues.<sup>3,15</sup>  
3 Barriers to adherence can be comprehended as the patient, medication, provider, and health  
4 system factors, with interactions among them.<sup>16,17</sup> Patient factors that influence adherence  
5 include poor health literacy, cultural beliefs regarding medication effectiveness, and religious  
6 healing practices.<sup>17</sup> Low income, forgetting to take medication, and perceptions regarding pills  
7 like safety concerns, convenience, and necessity add to the above list.<sup>16,17</sup> Inadequate  
8 knowledge about a drug and its use, not being convinced of the need for medication, fear of  
9 adverse effects, and long-term treatment regimens also prompt medication discontinuation.<sup>15</sup>  
10 Clinician factors cover failure to recognize nonadherence, prescription of complex and  
11 multidrug regimens, ineffective communication of benefits of medications, and excluding  
12 patients in the treatment decision-making process.<sup>17</sup> Health system factors comprise limited  
13 insurance coverage, poor coordination of care between inpatient and outpatient settings, and  
14 inadequate communication between prescribers (i.e., specialists and primary care clinicians).  
15 In addition, the caregivers' aspect also becomes relevant in determining patients' adherence as  
16 CVD patients with a caregiver are more likely to be adherent to medications.<sup>18</sup> Hence  
17 identifying specific barriers for each patient and adopting suitable techniques to overcome them  
18 is imperative to improve medication adherence. Some of the facilitators successful in  
19 overcoming these barriers include a personal medication counsellor in the care continuum to  
20 guide patients with medication use, single-pill fixed-dose combinations, training pharmacists  
21 as coaches for drug therapies, building peer groups for chronic conditions, and developing  
22 information systems in the follow-up of patients.<sup>19</sup>  
23 Quantitative studies have focused on medication adherence incidence, and identification of its  
24 potential risk factors. They do not, however, uncover life circumstances that may influence  
25 adherence from the patient perspective. The inclusion of qualitative studies in our review will

1  
2  
3 1 provide a better understanding of the barriers and facilitators from the perspective and  
4  
5 2 experiences of patients, healthcare providers, and caregivers.<sup>20</sup> Qualitative evidence synthesis,  
6  
7 3 a novel research method, brings together the available qualitative evidence from primary  
8  
9 4 studies through a systematic review process. Despite the evidence obtained from primary  
10  
11 5 qualitative studies could be conceptually richer, a qualitative evidence synthesis can aid us in  
12  
13 6 getting an overall view of the findings, and help us in addressing subtle and sensitive issues  
14  
15 7 that most primary studies encounter. The findings from a qualitative evidence synthesis can  
16  
17 8 guide us in crucial making policy recommendations in health care, retaining the impact of  
18  
19 9 individual studies and group experiences. <sup>21</sup> Therefore, the current review was done to  
20  
21 10 understand the perspective of various stakeholders (patients, caregivers, and healthcare  
22  
23 11 providers) on the barriers and facilitators for medication adherence among CVD and DM  
24  
25 12 patients in India. We also explored the suggestions and solutions provided by these  
26  
27 13 stakeholders in overcoming the reported barriers.  
28  
29  
30  
31  
32  
33

## 34 **METHODS**

35  
36  
37 15 This review was performed by adhering to the “enhancing transparency in reporting the  
38  
39 16 synthesis of qualitative research (ENTREQ)” statement.<sup>22</sup> We registered our protocol in the  
40  
41 17 PROSPERO database (Registration number - CRD42020199529). We also searched  
42  
43 18 PROSPERO and Cochrane to ensure that no similar review protocol has been reported. We  
44  
45 19 also performed a preliminary search to ensure that no previous reviews of our similar topic  
46  
47 20 targeting the Indian population were published.  
48  
49

### 51 **Study design**

52  
53 22 We performed an evidence synthesis of the available qualitative evidence on the barriers and  
54  
55 23 facilitating factors for medication adherence among CVD and DM patients. This review would  
56  
57  
58  
59  
60

1 help to aggregate the evidence of peer-reviewed articles in this field and build an organized  
2 empirical research outline based on prior knowledge.

### 3 ***Eligibility criteria***

#### 4 *Study type*

5 We have included qualitative peer-reviewed studies conducted in India for our current review.  
6 Furthermore, qualitative evidence from other mixed methods studies was screened for  
7 eligibility and included in the qualitative component was relevant to our review. In addition,  
8 we included studies using qualitative techniques for data collection such as focussed group  
9 discussion (FGD), in-depth interviews (IDI), and Key Informant Interviews (KII).

#### 10 *Participant type*

11 We have included the studies reporting the barriers and facilitators of medication adherence  
12 from patients' perspectives (CVD and DM), family members, healthcare workers (HCWs), or  
13 health system policymakers in India. HCWs were defined as per WHO recommendation as "all  
14 the persons involved in the actions whose primary intent is to enhance the health."<sup>23</sup>

#### 15 *Outcome*

16 The phenomenon of interest in our review was to explore the barriers and facilitators for  
17 medication adherence among CVD and DM patients in India. We also explored the possible  
18 suggestions and solutions to address the barriers and improve compliance, as experienced by  
19 the patients, caregivers, family members, HCWs, and other relevant stakeholders.

#### 20 ***Exclusion criteria***

21 We have excluded the studies not available in English, books or conference abstracts or grey  
22 literature, or editorial comments. We have also excluded the studies reporting only quantitative  
23 data such as cross-sectional surveys, case-control, cohort studies, or intervention trials.

#### 24 ***Search strategy***

1 We have conducted a comprehensive and systematic search in databases and search engines  
2 such as Medline, Cochrane library, ScienceDirect, and Google Scholar. A combination of  
3 medical subject heading (MeSH) and free-full text terms were used for carrying out a literature  
4 search. The detailed search strategy and search results in the databases mentioned above and  
5 search engines are provided in Supplementary File 1. In addition to this, we also checked the  
6 reference list of primary studies obtained via electronic search and included articles relevant to  
7 our review and analysis. The search was conducted in all the databases from January 2010 to  
8 July 2020 with English language restriction for publication. Furthermore, the search timeline  
9 was restricted to ensure that our work provides a broader view and identifies the emerging  
10 issues.

### 11 **Study selection process**

12 Two investigators (YK and TR) independently performed the literature search, screened the  
13 title and abstract of all the identified studies, and retrieved the full text for articles relevant to  
14 our review. Further full-text screening of the retrieved articles was done again independently  
15 by the two investigators (YK, TR) to select the studies matching the eligibility criteria of our  
16 review. Disagreements during this process between the two investigators were resolved  
17 through consultation with a third investigator (SR).

### 18 **Data Extraction and Management**

19 After the study selection, two investigators (YK and TR) independently extracted the relevant  
20 data and study characteristics onto a predetermined data extraction format. Data entry was  
21 double-checked for accuracy by a third investigator (SR) by comparing the data presented in  
22 the review and individual study reports. As a result, we have extracted the following study  
23 characteristics: general information such as the name of the first author, the country in which  
24 the study was done, and year of publication, in the methods section, data collection period,  
25 study design, study participants, sample size, sampling technique, and data collection

1 procedure. In addition, barriers, facilitators, suggestions, and solutions to medication adherence  
2 were identified systematically.

### 3 **Quality assessment**

4 Two investigators (YK and SR) independently performed the quality check using the Critical  
5 Appraisal Skills Programme (CASP) criteria.<sup>24</sup> This checklist has been widely used for  
6 assessing the quality of studies included in this Qualitative Evidence synthesis.<sup>25</sup> This has  
7 helped determine whether the studies included are coherent with the quality appraisal standard  
8 for qualitative studies. This checklist consists of 10 questions concerning the study's clarity,  
9 methodology, and results to rank the included studies. Subsequently, these studies were  
10 stratified into high quality (three stars for studies scoring 8 to 10 points), medium quality (two  
11 stars for studies scoring 4 to 7 points), and low rate (one star for studies scoring 0 to 3 points).  
12 We did not exclude the low-quality studies, but the interpretation of results was made with  
13 caution. Disagreements during the quality assessment process were resolved by discussion with  
14 the third investigator (TR).

### 15 **Data Analysis**

16 We analysed and reported the findings in separate clusters such as patients, caregivers, family  
17 members, HCWs, and policymakers to demonstrate the differences among these subgroups.  
18 We have adopted a thematic framework analysis to analyse and synthesize the data. Thematic  
19 framework analysis has been helpful as the evidence was primarily descriptive and improved  
20 our understanding of the barriers and facilitators in medication adherence among CVD and DM  
21 patients. This framework synthesis has five stages of synthesizing the qualitative data.

22 ***First stage - Familiarisation with the data:*** Primary investigator (YK) did the process of  
23 familiarisation with data by reviewing all the selected articles against the objective of our  
24 review and found the recurrent themes across the included studies.



1  
2  
3 1 **The second stage - Identifying the thematic framework:** The investigators used a  
4  
5 2 predetermined thematic framework developed using literature to guide the thematic analysis.  
6  
7 3 The final framework comprised of a detailed list of facilitators and barriers for medication  
8  
9 4 adherence and also solutions to address the issue.

10  
11  
12 5 **Third stage - Indexing:** Two independent investigators (YK and SR) read the extracted  
13  
14 6 information and searched for themes as per the predetermined thematic framework and found  
15  
16 7 additional emerging themes. The framework underwent several revisions as and when a new  
17  
18 8 theme emerged. This has been performed through discussion and agreement between the entire  
19  
20 9 team of investigators. Next, all the studies were completely read and examined till there was  
21  
22 10 no new emergent theme. Coding of the data was then done as per the themes identified in our  
23  
24 11 analysis. Finally, each preliminary study indexing was done using the codes related to the  
25  
26 12 thematic framework. Whenever appropriate, sections of the studies were indexed with one or  
27  
28 13 more codes.

29  
30  
31  
32  
33 14 **Fourth stage - Charting:** The investigators have sorted the data based on the themes and  
34  
35 15 presented these themes in the tabular format (chart). The rows and columns of the table indicate  
36  
37 16 the themes related to the studies, which enabled us to compare the study findings across various  
38  
39 17 themes and subthemes.

40  
41  
42 18 **Fifth stage - Mapping and interpretation:** The investigators used these charts to define the  
43  
44 19 concepts identified, and mapped the nature and range of the phenomena. Our review explored  
45  
46 20 the associations between the various themes and helped in clarifying the findings. Finally, we  
47  
48 21 mapped and interpreted the findings in line with our objectives and emergent themes.

## 52 **Results**

### 56 **Study selection**

1 A comprehensive and systematic search was done to identify the relevant studies from January  
2 2010 to July 2020. In total, we identified 1187 citations, and after the removal of duplicates  
3 from multiple databases, 982 records were screened for their title and abstract and assessed for  
4 eligibility. From these records, we retrieved 33 articles, and after going through the full text of  
5 these articles, 18 studies were included in the review. (**Figure 1**).<sup>26-43</sup>

### 6 **Characteristics of the studies included**

7 Characteristics of the included studies are reported in **Table 1**. Of the 18 studies included, 9  
8 (50%) were from the Southern region, followed by 7 (38%) from the Northern part of India.  
9 The mean age of the participants ranged from 25-76 years. The typology of the studies  
10 comprised of in-depth interviews (IDIs) and focussed group discussions (FGDs). The study  
11 participants were primarily patients with diabetes, hypertension, or any cardiovascular diseases  
12 (to explore the patient perspective), and health care workers (4 studies) providing care to them  
13 (to obtain the provider perspective). The total sample size of the included studies ranged from  
14 6 to 100. The majority (10 of the included studies) were done in a community setting, while  
15 the rest were either facility-based or had participants from ongoing trials. Four of the included  
16 studies used software for analysing the qualitative data, while the rest followed manual  
17 methods. Most of the included studies (14 out of 18) had higher ratings indicating high-quality  
18 evidence.

### 19 **Narrative synthesis**

20 Significant findings from the review showed that factors contributory to adherence come under  
21 three themes: patient-related, family-related, and health system-related factors. The barriers,  
22 facilitators, and suggestions to improve medication adherence were summarized under these  
23 three themes.

### 24 **Barriers in medication adherence**

1 **Table-2** shows the thematic framework analysis related to barriers in medication adherence  
2 among CVD and DM patients. All the 18 included studies have explored and reported on these  
3 barriers.

4 *Patient-related factors*

5 Significant patient-related barriers (10 studies) reported were lack of knowledge or  
6 understanding about the disease, its complications related to nonadherence, and the treatment  
7 schedule, followed by forgetfulness to take medicine (7 studies). Reasons provided for the same  
8 were the patients' busy schedule, laziness, or forgetting to take the medication while traveling  
9 out-of-station. Patients have also reported certain misconceptions about the medicines like the  
10 risk of long-term neurological illness because of medication intake, inferior quality of drugs  
11 provided in hospitals, and wrong perception about stopping the medications once the patient  
12 feels normal. Patients in some studies have reported that they practice alternate systems of  
13 medicine such as herbal medicines and avoid taking allopathic medicines leading to poorer  
14 control of their condition. Substance use such as alcohol or tobacco use, side effects related to  
15 drugs, stress, and stigma were reported to be other barriers

16 *Family-related factors*

17 The patients and providers have reported a lack of family support as a significant contributing  
18 factor for nonadherence. In addition, the lack of social and emotional support to the patients  
19 further contributes to the nonadherence among the patients suffering from CVDs and DM.  
20 Domestic works, personal priorities, commitments, or other issues hinder the family members  
21 from providing the above-mentioned support to the patients.

22 *Health system-related factors*

23 In most of these studies, providers were also interviewed to understand the factors related to  
24 the health system responsible for nonadherence among CVD and DM patients. Healthcare  
25 providers and patients interviewed, in almost all these studies, have reported affordability,

1 accessibility, and acceptability as the major factors hindering medication adherence.  
2  
3 Affordability is an issue with patients seeking healthcare in private facilities and patients  
4  
5 getting care in public healthcare facilities. Though there was no direct medical cost related to  
6  
7 government hospitals or primary healthcare centres, direct non-medical costs such as transport  
8  
9 (due to poor accessibility) and indirect costs such as loss of wages (due to inconvenient  
10  
11 consultation timing) were higher amongst these patients. In addition, patients have a wrong  
12  
13 perception that medications in public facilities are of poorer quality, making them choose  
14  
15 private health facilities, including those belonging to lower socioeconomic status. Lack of risk  
16  
17 communication, counselling, or empathy by the physicians mainly due to overburdening public  
18  
19 health facilities and time constraints were the other health system-related barriers reported by  
20  
21 the providers and patients.  
22  
23

## 24 **Facilitators in medication adherence**

25 Facilitators in medication adherence were also summarized using the pre-existing thematic  
26  
27 framework (**Table-3**). In total, ten studies have explored the facilitators in medication  
28  
29 adherence from the patient or providers' perspective.  
30  
31

### 32 *Patient-related factors*

33 Most of the studies (5 studies) reported fear of complications due to nonadherence and self-  
34  
35 perception of being healthy (once they adhere to the medications) as the significant facilitators.  
36  
37 In addition, having a reminder system in the form of a reminder notebook, separate  
38  
39 pillboxes/cases/covers or personalized shelf facilitate the patients in adhering to the  
40  
41 medications. Some studies have also reported that integrating drug intake into daily routine  
42  
43 activities and peer influence acts as a good facilitator in compliance with medications.  
44  
45

### 46 *Family-related factors*

47 Family support was reported as a major facilitating factor for compliance with medication.  
48  
49 Apart from the support, adverse experiences in the past, such as death or severe complications  
50  
51  
52  
53  
54  
55  
56  
57  
58  
59  
60

1 among the family members, instilled fear in the patients, making them more compliant to the  
2 medications.

### 3 *Health system-related factors*

4 Barriers reported in some of the studies, such as empathy and counselling by healthcare  
5 providers, were considered facilitators by the other studies' patients. Another major facilitator  
6 from the health system side is the trust that patient has in their physician and their willingness  
7 to effectively follow advice related to self-care and adherence. Other familiar facilitators  
8 reported by the patients and providers were the use of dedicated pill cover/boxes for each drug  
9 provided in the clinic, linkage of health services with NGO for provision of counselling and  
10 generating awareness, availability of medication, and use of polypills.

### 11 **Suggestions to improve medication adherence**

12 Suggestions and solutions to enhance the compliance to medication were reported in 16 out of  
13 the 18 included studies based on either patient or provider's perspective (**Table-4**). Few  
14 suggestions were related to patients and family members, while the majority were related to  
15 the change in the health system.

### 16 *Patient and family-related factors*

17 Creating or joining a peer support group was one of the major suggestions related to the  
18 patients. This will help by motivating the patients to be more compliant with medications and  
19 other self-care practices. Digital reminder systems using a watch and a mobile phone can also  
20 improve medication adherence.

### 21 *Health system-related factors*

22 Innovations in patient care, have been necessitated as an important factor to promote drug  
23 adherence. Some of the innovations suggested were dedicated days for specific disease  
24 conditions to avoid overburdening the facilities, a dedicated counselling station for drug  
25 adherence during the clinic with separate human resource, and a unique pill dispensing

1  
2  
3 1 mechanism like colour coding, etc. In addition, Information Education and Communication  
4  
5 2 (IEC)/Behaviour change communication (BCC) campaigns, digitalizing the patient treatment  
6  
7 3 records, linkage of healthcare services with NGOs or community-based organizations, regular  
8  
9 4 training of healthcare workers, and promotion of polypill use were other common suggestions  
10  
11 5 offered by the healthcare providers.  
12  
13

## 14 6 **Discussion**

15  
16  
17 7 We conducted this review to integrate the qualitative evidence on barriers and facilitators for  
18  
19 8 medication adherence among CVD and DM patients in India. We also further explored the  
20  
21 9 suggestions to improve the same. The studies included in our review involved a total of 636  
22  
23 10 participants (534 CVD and DM patients, 102 healthcare providers). The majority of the  
24  
25 11 included studies were of high quality with respect to study clarity, methodology and results.  
26  
27 12 We summarized under three major themes: barriers, facilitators, suggestions and reported the  
28  
29 13 findings under the following four sub-themes: patients, care team, healthcare organization and  
30  
31 14 environment-related factors.  
32  
33

### 34 15 *Comparison of findings with previous literature*

#### 35 16 *Barriers in medication adherence*

36  
37  
38 17 Major barriers were lack of patient's understanding about the disease and its complications,  
39  
40 18 forgetfulness and misconception about the medications. Lack of family support was seen as a  
41  
42 19 major barrier from both patient's and provider's perspectives. In addition to these factors, stress  
43  
44 20 and stigma were also mentioned as important factors among patients to not take medicine on  
45  
46 21 time. In addition to the above, medication adherence could also be highly hindered by the  
47  
48 22 patients' cultural beliefs, perceived discrimination, and social customs, which are highly  
49  
50 23 prevalent in a culturally influenced country like India. A few studies have also shown evidence  
51  
52 24 of improvisation in medication adherence where efforts were taken to overcome the cultural  
53  
54 25 barriers.<sup>44</sup> We also found major health system-related barriers were lack of accessibility and  
55  
56  
57  
58  
59  
60

1  
2  
3 1 availability, higher cost of medications and poor physician attitude. These findings were in line  
4  
5 2 with the previous review conducted among South-East Asian DM patients.<sup>44,46</sup> In addition, our  
6  
7 3 findings about patients related factors were found to be similar to other patients belonging to  
8  
9 4 non-English speaking Hispanic, South American ethnic groups, as they also had  
10  
11 5 misconceptions related to therapy, lack of understanding about their condition, with additional  
12  
13 6 stress and stigma as a factor for non-adherence.<sup>47-49</sup>  
14  
15  
16

#### 17 *Facilitators in medication adherence*

18  
19 8 Fear of complications, self-perception of being healthy, having a reminder system were  
20  
21 9 reported as major facilitators by patients. Physician trust, advice, empathy, and counselling  
22  
23 10 were the other provider-related facilitators in adhering to medications. Common facilitators as  
24  
25 11 reported by the patients and providers were: dedicated pill cover/boxes for each drug provided  
26  
27 12 in the clinic, availability of medication and use of polypills. These findings were also in line  
28  
29 13 with the previous qualitative reviews conducted in low middle-income countries including  
30  
31 14 India.<sup>47-50</sup>  
32  
33  
34

#### 35 *Suggestions to improve medication adherence*

36  
37 16 The solutions provided by the patients and health professionals were in line with the barriers  
38  
39 17 identified in our review. Proper physician counselling to make the patients understand their  
40  
41 18 own condition, complications of the disease and avoid misconception about the drugs and their  
42  
43 19 side effects, good family support, making the medication accessible and available free of cost  
44  
45 20 were suggested as major suggestions to improve medication adherence. Similar interventions  
46  
47 21 were also suggested by previous qualitative evidence on medication adherence among CVD  
48  
49 22 and DM patients.<sup>45-49</sup> It is also interesting to note that medication adherence is also hurdled by  
50  
51 23 the patients' intention towards adherence, and this intention might vary across nations and  
52  
53 24 cultural groups. The patient's intention not to refill prescriptions due to cost, not to take  
54  
55 25 medication because the patient feels better, also influence the patient's decision. Thus future  
56  
57  
58  
59  
60

1 research exploring these reasons on patient's choice to adhere or not, rather than an inability to  
2 adhere (e.g., forgetting, no access) needs to be encouraged.

### 3 *Strengths and limitations of the study*

4 To the best of our knowledge, this is the first review exploring and synthesizing the qualitative  
5 factors associated with medication adherence among CVD and DM patients in India. We have  
6 provided comprehensive and systematic evidence on the barriers, facilitators related to  
7 medication adherence, adhering to the ENTREQ statement and ensuring transparency and  
8 reproducibility. We examined this evidence through the lenses of a well-established theoretical  
9 framework model. Moreover, our study was able to provide valuable suggestions to promote  
10 medication adherence from both patients and provider's perspectives. In addition to these  
11 strengths, we found that the highest-rated studies contributed to the majority of the factors  
12 found in our review. This in turn ensures the transferability (external validity) of our review  
13 findings.

14 However, our review has certain limitations. We did not search grey literature, possibly missing  
15 some insights for our review. Hence, we cannot rule out of the dissemination bias with respect  
16 to accurate and complete representation of the phenomenon of interest. We focussed primarily  
17 on the patient and provider perspective on medication adherence.<sup>51</sup> Hence, we cannot comment  
18 on the organizational or political influences on the adherence to long-term therapies as  
19 mentioned in the WHO report.<sup>16</sup> The sample size of the included studies can be considered  
20 relatively low (median sample size - 30). However, all the studies were conducted till the  
21 achievement of data saturation. In addition to the above, these results and suggestions need to  
22 be considered after taking into account India's cross-cultural adaptations, customs, linguistic  
23 variations and genetic susceptibility and higher prevalence of risk factor profile.

### 24 *Implications for clinical and public health practice*



1  
2  
3 1 Improving medication adherence is essential to achieve better control and prevent life-  
4  
5 2 threatening complications. Factors related to patients such as self-awareness and fear about the  
6  
7 3 condition and its complications acted as a major facilitator for medication adherence. We also  
8  
9 4 found more modifiable barriers related to medication intakes such as forgetfulness, lack of  
10  
11 5 knowledge, and misconception about medications. Interventions should focus on these  
12  
13 6 modifiable barriers such as knowledge barriers, intention barriers and health system-related  
14  
15 7 barriers to achieve better adherence. In addition, it is important for the family members to help  
16  
17 8 the patients in mapping their daily routine and link the medicine intake with these routines to  
18  
19 9 facilitate adherence. Our review also suggested that healthcare providers play an important role  
20  
21 10 in promoting medication adherence. Hence, the interventions should not only target the patients  
22  
23 11 but also the family members and healthcare providers and they should be tailored to suit  
24  
25 12 differences in setting, culture and type of the patients.

### 31 *Implications for future research*

32  
33 14 More evidence need to be generated with respect to the solutions obtained in our review such  
34  
35 15 as memory tools including the digital solutions, polypills, peer support groups etc. Further  
36  
37 16 qualitative studies including the subgroup of patients with CVD and DM under different stages  
38  
39 17 and treatment regimens are required to contextualize the medication adherence. Exploring the  
40  
41 18 barriers using a theoretical framework with the same methodological approach, can provide  
42  
43 19 more reliable evidence to develop patient-centred interventions and achieve better control  
44  
45 20 among CVD and DM patients.

### 49 **Conclusion:**

50  
51 22 In our review, we categorised the facilitating factors and barriers influencing medication  
52  
53 23 adherence into patient related, health system related and care team related factors. Thus, we  
54  
55 24 advocate creation of peer support group, use of digital reminder system for overcoming patients  
56  
57 25 related factors, and integration of AYUSH services, mental health, physiotherapy and geriatric  
58  
59  
60

1  
2  
3 1 clinics even at the primary healthcare level for overcoming the health system related barriers  
4  
5 2 towards medication adherence.  
6  
7

8 3 **References:**

- 9  
10 4 1. Walker IF, Garbe F, Wright J, Newell I, Athiraman N, Khan N, et al. The Economic  
11  
12 5 Costs of Cardiovascular Disease, Diabetes Mellitus, and Associated Complications in  
13  
14 6 South Asia: A Systematic Review. *Value Health Reg Issues*. 2018;15:12–26.  
15  
16  
17 7 2. Glovaci D, Fan W, Wong ND. Epidemiology of Diabetes Mellitus and Cardiovascular  
18  
19 8 Disease. *Curr Cardiol Rep*. 2019;21:21.  
20  
21  
22 9 3. Prabhakaran D, Jeemon P, Sharma M, Roth GA, Johnson C, Harikrishnan S, et al. The  
23  
24 10 changing patterns of cardiovascular diseases and their risk factors in the states of India:  
25  
26 11 the Global Burden of Disease Study 1990–2016. *Lancet Glob Health*. 2018;6:e1339–  
27  
28 12 51.  
29  
30  
31 13 4. Tandon N, Anjana RM, Mohan V, Kaur T, Afshin A, Ong K, et al. The increasing  
32  
33 14 burden of diabetes and variations among the states of India: the Global Burden of  
34  
35 15 Disease Study 1990–2016. *Lancet Glob Health*. 2018;6:e1352–62.  
36  
37  
38 16 5. Durand H, Hayes P, Morrissey EC, Newell J, Casey M, Murphy AW, et al. Medication  
39  
40 17 adherence among patients with apparent treatment-resistant hypertension: systematic  
41  
42 18 review and meta-analysis. *J Hypertens*. 2017;35:2346–57.  
43  
44  
45 19 6. Polypharmacy and Medication Adherence in Patients With Type 2 Diabetes | Diabetes  
46  
47 20 Care [Internet]. [cited 2020 Jul 30]. Available from:  
48  
49 21 <https://care.diabetesjournals.org/content/26/5/1408.short>  
50  
51  
52 22 7. Vrijens B, Antoniou S, Burnier M, de la Sierra A, Volpe M. Current Situation of  
53  
54 23 Medication Adherence in Hypertension. *Front Pharmacol* [Internet]. 2017 [cited 2020  
55  
56 24 Jul 31];8. Available from:  
57  
58 25 <https://www.frontiersin.org/articles/10.3389/fphar.2017.00100/full>  
59  
60

- 1  
2  
3 1 8. Rehman T, Rajaa S, Kumar G, Jayalakshmy R. Prevalence and factors influencing  
4  
5 2 diabetes among persons with type 2 diabetes mellitus in urban Puducherry: A cross-  
6  
7 sectional analytical study. *Indian J Community Med.* 2020 Jul;45(3):315.  
8  
9
- 10 4 9. Polonsky WH, Henry RR. Poor medication adherence in type 2 diabetes: recognizing  
11  
12 5 the scope of the problem and its key contributors. *Patient Prefer Adherence.*  
13  
14 6 2016;10:1299–307.  
15  
16
- 17 7 10. Leporini C, De Sarro G, Russo E. Adherence to therapy and adverse drug reactions: is  
18  
19 8 there a link? *Expert Opin Drug Saf.* 2014;13 Suppl 1:S41-55.  
20  
21
- 22 9 11. Lam WY, Fresco P. Medication Adherence Measures: An Overview. *BioMed Res Int.*  
23  
24 10 2015; 2015:1–12.  
25
- 26 11 12. Kvarnström K, Airaksinen M, Liira H. Barriers and facilitators to medication  
27  
28 12 adherence: a qualitative study with general practitioners. *BMJ Open.* 2018;8:e015332.  
29
- 30 13 13. Ferdinand KC, Senatore FF, Clayton-Jeter H, Cryer DR, Lewin JC, Nasser SA, et al.  
31  
32 14 Improving Medication Adherence in Cardiometabolic Disease. *J Am Coll Cardiol.*  
33  
34 15 2017;69:437–51.  
35  
36
- 37 16 14. Krueger KP, Berger BA, Felkey B. Medication adherence and persistence: a  
38  
39 17 comprehensive review. *Adv Ther.* 2005;22:313–56.  
40  
41
- 42 18 15. Dennis T, Meera NK, Binny K, Sekhar MS, Kishore G, Sasidharan S. Medication  
43  
44 19 adherence and associated barriers in hypertension management in India. *CVD Prev*  
45  
46 20 *Control.* 2011 Jan 1;6(1):9-13.  
47  
48
- 49 21 16. Miller NH, Hill M, Kottke T, Ockene IS. The multilevel compliance challenge:  
50  
51 22 recommendations for a call to action. A statement for healthcare professionals.  
52  
53 23 *Circulation.* 1997;95:1085–90.  
54  
55  
56  
57  
58  
59  
60

- 1  
2  
3 1 17. WHO | ADHERENCE TO LONG-TERM THERAPIES: EVIDENCE FOR ACTION  
4  
5 2 [Internet]. WHO. World Health Organization; [cited 2020 Jul 30]. Available from:  
6  
7 3 [http://www.who.int/chp/knowledge/publications/adherence\\_report/en/](http://www.who.int/chp/knowledge/publications/adherence_report/en/)  
8  
9  
10 4 18. Aggarwal B, Liao M, Mosca L. Medication Adherence Is Associated with Having a  
11  
12 5 Caregiver Among Cardiac Patients. *Ann Behav Med Publ Soc Behav Med.*  
13  
14 6 2013;46:237–42.  
15  
16  
17 7 19. Daliri S, Bekker CL, Buurman BM, Scholte op Reimer WJM, van den Bemt BJJ,  
18  
19 8 Karapinar – Çarkit F. Barriers and facilitators with medication use during the transition  
20  
21 9 from hospital to home: a qualitative study among patients. *BMC Health Serv Res.* 2019;  
22  
23 10 19:204.  
24  
25  
26 11 20. Rathbone AP, Todd A, Jamie K, Bonam M, Banks L, Husband AK. A systematic  
27  
28 12 review and thematic synthesis of patients' experience of medicines adherence. *Res*  
29  
30 13 *Social Admin Pharm.* 2017 May 1;13(3):403-39.  
31  
32  
33 14 21. Flemming K, Booth A, Garside R, Tunçalp Ö, Noyes J. Qualitative evidence synthesis  
34  
35 15 for complex interventions and guideline development: clarification of the purpose,  
36  
37 16 designs and relevant methods. *BMJ Global Health.* 2019 Jan 1;4(Suppl 1):e000882.  
38  
39  
40 17 22. Tong A, Flemming K, McInnes E, Oliver S, Craig J. Enhancing transparency in  
41  
42 18 reporting the synthesis of qualitative research: ENTREQ. *BMC Med Res Methodol.*  
43  
44 19 2012; 12:181  
45  
46  
47 20 23. Mohanty A, Kabi A, Mohanty AP. Health problems in healthcare workers: A review. *J*  
48  
49 21 *Family Med Primary Care.* 2019 Aug;8(8):2568.  
50  
51  
52 22 24. Critical Appraisal Skills Programme (2018). CASP (Qualitative) Checklist. [online]  
53  
54 23 Available at: [https://casp-uk.net/wp-content/uploads/2018/01/CASP-Qualitative-](https://casp-uk.net/wp-content/uploads/2018/01/CASP-Qualitative-Checklist-2018.pdf)  
55  
56 24 [Checklist-2018.pdf](https://casp-uk.net/wp-content/uploads/2018/01/CASP-Qualitative-Checklist-2018.pdf) Accessed: 12 September 2020  
57  
58  
59  
60

- 1  
2  
3 1 25. Booth A, Noyes J, Flemming K, Gerhardus A, Wahlster P, van der Wilt GJ, et al.  
4  
5 2 Structured methodology review identified seven (RETREAT) criteria for selecting  
6  
7 3 qualitative evidence synthesis approaches. *J Clin Epidemiol*. 2018 Jul 1;99:41-52.  
8  
9
- 10 4 26. Agarwal A, Davies D, Goenka S, Prabhakaran D, Huffman MD, Mohanan PP.  
11  
12 5 Facilitators and barriers of heart failure care in Kerala, India: A qualitative analysis of  
13  
14 6 healthcare providers and administrators. *Indian Heart J*. 2019; 71(3):235–41.  
15  
16
- 17 7 27. Dhar L. Perceptions of global coronary heart disease risk, and adherence to  
18  
19 8 antihypertensive treatment among low income urban women in Delhi, India (Doctoral  
20  
21 9 dissertation, Curtin University).  
22  
23
- 24 10 28. George CE, Ramadas D, Norman G, Mukherjee D, Rao T. Barriers to cardiovascular  
25  
26 11 disease risk reduction: Does physicians' perspective matter? *Indian Heart J*. 2016;  
27  
28 12 68(3):278–85  
29  
30
- 31 13 29. Gupta S, Dhamija JP, Mohan I, Gupta R. Qualitative Study of Barriers to Adherence to  
32  
33 14 Antihypertensive Medication among Rural Women in India. *Int J Hypertens*. 2019;  
34  
35 15 2019:1–7.  
36  
37
- 38 16 30. Gupta S, Virk A, Mittal A, Agarwal B. Patterns and determinants of healthcare-seeking  
39  
40 17 behavior among hypertensive patients in a rural population of north India: A mixed-  
41  
42 18 method study. *J Family Med Prim Care*. 2020; 9(6):2830  
43  
44
- 45 19 31. Jayanna K, Swaroop N, Kar A, Ramanaik S, Pati MK, Pujar A, et al. Designing a  
46  
47 20 comprehensive Non-Communicable Diseases (NCD) programme for hypertension and  
48  
49 21 diabetes at primary health care level: evidence and experience from urban Karnataka,  
50  
51 22 South India. *BMC Public Health*. 2019; 19:1  
52  
53
- 54 23 32. Krishnamoorthy Y, Giriappa DK, Eliyas SK, Priyan S, Saya GK, Lakshminarayanan  
55  
56 24 S. Patient and Provider's Experience and Perspective in Addressing Barriers to  
57  
58  
59  
60

- 1 Medication Adherence Among Noncommunicable Disease Patients in Rural  
2 Puducherry, South India—A Qualitative Study. *J Patient Exp.* 2019; 6(3):216–23
- 3 33. Kusuma YS. Migrants' Perceptions on Barriers to Treatment Seeking for Hypertension:  
4 A Qualitative Study from Delhi, India. *Studies on Ethno-Medicine.* 2010; 4(3):173–6
- 5 34. Miller V, Nambiar L, Saxena M, Leong D, Banerjee A et al. Exploring the barriers to  
6 and facilitators of using evidence-based drugs in the secondary prevention of  
7 cardiovascular diseases: findings from a multistakeholder, qualitative analysis. *Global*  
8 *Heart.* 2018; 13(1):27-34.
- 9 35. Newtonraj A, Arun S, Bazroy J, Tovia S. Lay perspectives on causes and complications  
10 of hypertension; and barrier to access health care by known hypertensive patients: a  
11 qualitative study from a rural area of South India. *Int J Community Med Public Health.*  
12 2017; 4(3):704
- 13 36. Nimesh VV, Halder A, Mitra A, Kumar S, Joshi A, Joshi R, et al. Patterns of healthcare  
14 seeking behavior among persons with diabetes in Central India: A mixed method study.  
15 *J Family Med Prim Care.* 2019; 8(2):677.
- 16 37. Pati S, Van den Akker M, Schellevis FF, Sahoo K, Burgers JS. Managing diabetes  
17 mellitus with comorbidities in primary healthcare facilities: a qualitative study among  
18 physicians in Odisha, India. 2020. Research square [preprint] doi: 10.21203/rs.3.rs-  
19 22272/v1
- 20 38. Anitha Rani M, Shriram V. Are Patients With Type 2 Diabetes Not Aware or Are They  
21 Unable to Practice Self-Care? A Qualitative Study in Rural South India. *J Prim Care*  
22 *Community Health.* 2019; 10:2150132719865820.
- 23 39. Salam A, Praveen D, Patel A, Tewari A, Webster R. Barriers and facilitators to the use  
24 of cardiovascular fixed-dose combination medication (polypills) in Andhra Pradesh,  
25 India: a mixed-methods study. *Global Heart.* 2019; 14(3):303-10.

- 1  
2  
3 1 40. Satish P, Khetan A, Barbhaya D, Agarwal M, Mohan SK, Josephson R, Weibel AR. A  
4  
5 2 qualitative study of facilitators and barriers to cardiovascular risk factor control in a  
6  
7 3 semiurban population in India. *J Family Med Prim Care*. 2019; 8(12):3773-3778.  
8  
9  
10 4 41. Thakur JS, Vijayvergiya R, Jaswal N, Ginsburg A. Assessment and barriers to  
11  
12 5 medication adherence for secondary prevention of cardiovascular disease among  
13  
14 6 patients with coronary artery disease in Chandigarh, India. *Int J Non-Commun Dis*.  
15  
16 7 2016;1:37-41.  
17  
18  
19 8 42. Venkatesan M, Dongre AR, Ganapathy K. A community-based study on diabetes  
20  
21 9 medication nonadherence and its risk factors in rural Tamil Nadu. *Indian J Community*  
22  
23 10 *Med*. 2018; 43(2):72-76  
24  
25  
26 11 43. Wood F, Salam A, Singh K, Day S, Jan S, Prabhakaran D, et al. Process evaluation of  
27  
28 12 the impact and acceptability of a polypill for prevention of cardiovascular disease. *BMJ*  
29  
30 13 *Open*. 2015; 5(9):e008018  
31  
32  
33 14 44. Saha S, Korthuis PT, Cohn JA, Sharp VL, Moore RD, Beach MC. Primary care  
34  
35 15 provider cultural competence and racial disparities in HIV care and outcomes. *J Gen*  
36  
37 16 *Intern Med*. 2013;28(5):622-9. <https://doi.org/10.1007/s11606-012-2298-8>.  
38  
39  
40 17 45. Sohal T, Sohal P, King-Shier KM, Khan NA. Barriers and Facilitators for Type-2  
41  
42 18 Diabetes Management in South Asians: A Systematic Review. *PLoS ONE*. 2015; 10(9):  
43  
44 19 e0136202.  
45  
46  
47 20 46. Sears K, Scobie A, MacKinnon NJ. Patient-related risk factors for self-reported  
48  
49 21 medication errors in hospital and community settings in 8 countries. *Can Pharm J:*  
50  
51 22 *Revue des Pharmaciens du Canada*. 2012 Mar;145(2):88-93.  
52  
53  
54 23 47. Nam S, Chesla C, Stotts NA, Kroon L, Janson SL. Barriers to diabetes management:  
55  
56 24 patient and provider factors. *Diabetes Res Clin Pract*. 2011; 93(1):1-9  
57  
58  
59  
60

- 1  
2  
3 1 48. Lipton RB, Losey LM, Giachello A, Mendez J, Girotti MH. Attitudes and issues in  
4  
5 2 treating Latino patients with type 2 diabetes: views of healthcare providers. *Diabetes*  
6  
7 3 *Educ.* 1998; 24: 67–71  
8  
9  
10 4 49. Sridharan SG, Chittem M, Maya S. Patients' Experiences of Barriers and Facilitators  
11  
12 5 for Adherence to Type 2 Diabetes Mellitus: A Meta-Ethnography. *Journal of Social*  
13  
14 6 *Health and Diabetes.* 2019 Dec;7(02):61-72.  
15  
16  
17 7 50. Al Hamid A, Ghaleb M, Aljadhey H, et al. A systematic review of qualitative research  
18  
19 8 on the contributory factors leading to medicine-related problems from the perspectives  
20  
21 9 of adult patients with cardiovascular diseases and diabetes mellitus. *BMJ Open* 2014;  
22  
23 10 4:e005992.  
24  
25  
26 11 51. Toews I, Booth A, Berg RC et al. Further exploration of dissemination bias in  
27  
28 12 qualitative research required to facilitate assessment within qualitative evidence  
29  
30 13 synthesis. *J Clin Epidemiol* 2017; 88:133–139  
31  
32  
33 14  
34  
35  
36  
37  
38  
39  
40  
41  
42  
43  
44  
45  
46  
47  
48  
49  
50  
51  
52  
53  
54  
55  
56  
57  
58  
59  
60



**Table 1: Characteristics of the studies included (N=18)**

| S.No | Author and year           | State      | Data collection method | Study participants                                                 | Study setting   | Approach    | Coding    | Theoretical framework used | Method of analysis      | Sample size         | Mean Age in years             | Study quality |
|------|---------------------------|------------|------------------------|--------------------------------------------------------------------|-----------------|-------------|-----------|----------------------------|-------------------------|---------------------|-------------------------------|---------------|
| 1.   | Agarwal 2019              | Kerala     | IDI                    | Clinical and administrative staff                                  | Facility based  | NR          | Inductive | NR                         | Dedoose Software        | 21                  | NR                            | ***           |
| 2.   | Dhar et al 2016           | Delhi      | IDI                    | Hypertensive women aged 35-59 years                                | Community based | NR          | Inductive | Yes                        | Manual content analysis | 30                  | 48                            | ***           |
| 3.   | George et al 2016         | Karnataka  | IDI                    | Physicians providing Non communicable disease care                 | Community based | NR          | Inductive | NR                         | Manual content analysis | 36                  | 46                            | ***           |
| 4.   | Gupta et al 2019          | Rajasthan  | IDI                    | Hypertensive women                                                 | Facility based  | NR          | NR        | NR                         | Manual content analysis | 30                  | 56                            | **            |
| 5.   | Gupta et al 2020          | Haryana    | IDI                    | Hypertension patients                                              | Facility based  | NR          | NR        | NR                         | Manual content analysis | 100                 | 38-76                         | ***           |
| 6.   | Jayanna et al 2019        | Karnataka  | IDI & FGD              | Diabetes and Hypertension patients                                 | Facility based  | NR          | NR        | Yes                        | Manual content analysis | 10 IDI + 20 FGDs    | NR                            | ***           |
| 7.   | Krishnamoorthy et al 2018 | Puducherry | IDI & KII              | Diabetes and Hypertension patients & Healthcare workers            | Community based | NR          | Inductive | NR                         | Manual content analysis | 6 IDI + 4 KII       | NR                            | ***           |
| 8.   | Kusuma et al 2010         | Delhi      | KII & FGD              | Recent and Settled Migrants having hypertension inhabited in Delhi | Community based | NR          | NR        | NR                         | Manual content analysis | 14 (KII) + 20 (FGD) | 38 – 50 (KII) & 25 – 40 (FGD) | ***           |
| 9.   | Miller et al 2017         | Delhi      | IDI                    | Cardiovascular disease patients                                    | Trial based     | Descriptive | NR        | NR                         | Manual content analysis | 14                  | NR                            | ***           |
| 10.  | Newtonraj et al 2017      | Tamil Nadu | Personal interviews    | Hypertensive patients                                              | Community based | NR          | NR        | NR                         | Manual content analysis | 40                  | NR                            | **            |

|     |                       |                     |           |                                            |                 |             |           |     |                           |    |    |     |
|-----|-----------------------|---------------------|-----------|--------------------------------------------|-----------------|-------------|-----------|-----|---------------------------|----|----|-----|
| 11. | Nimesh et al 2019     | Madhya Pradesh      | IDI       | Individuals with diabetes                  | Community based | NR          | Inductive | Yes | Manual content analysis   | 60 | 52 | *** |
| 12. | Patti et al 2020      | Orissa              | IDI       | Primary care physicians                    | Facility based  | NR          | NR        | NR  | Manual content analysis   | 17 | 40 | *** |
| 13. | Rani et al 2019       | Tamil Nadu          | FGD       | Individuals with diabetes                  | Community based | Descriptive | NR        | NR  | Manual content analysis   | 50 | 50 | **  |
| 14. | Salaam et al 2019     | Andhra Pradesh      | IDI       | Patients with Cardiovascular disease       | Community based | NR          | NR        | Yes | NVivo version 11 software | 12 | 62 | *** |
| 15. | Satish et al 2019     | West Bengal         | FGD       | Patients with hypertension and/or diabetes | Trial based     | NR          | NR        | Yes | Manual content analysis   | 70 | 53 | *** |
| 16. | Thakur et al 2016     | Chandigarh          | IDI & FGD | Coronary artery disease patients           | Facility based  | NR          | NR        | NR  | Manual Thematic analysis  | 20 | NR | *   |
| 17. | Venkatesan et al 2018 | Tamil Nadu          | IDI       | Health care workers                        | Community based | NR          | NR        | NR  | Anthropac software        | 10 | NR | *** |
| 18. | Wood et al 2015       | Hyderabad and Delhi | IDI       | Patients with Cardiovascular diseases      | Trial based     | NR          | NR        | Yes | Nvivo software            | 52 | 57 | *** |

NR – Not Reported

IDI – In depth Interview

FGD – Focussed Group Discussion

KII – Key informant interview

Table 2: Thematic framework analysis for summarizing barriers in medication adherence experienced by CVD &amp; DM patients in India

| Main theme/Sub-themes                                                                                 | Barriers in Medication Adherence                                                                                                                                              | Studies                                                                                                                                                                                                                      |
|-------------------------------------------------------------------------------------------------------|-------------------------------------------------------------------------------------------------------------------------------------------------------------------------------|------------------------------------------------------------------------------------------------------------------------------------------------------------------------------------------------------------------------------|
| <b>PATIENTS</b>                                                                                       | <b>1. Lack of awareness/knowledge:</b> Lack of knowledge and understanding about the disease, its complications and treatment among the patients                              | <b>Dhar et al 2016, George et al 2016, Gupta et al 2019, Krishnamoorthy et al 2018, Kusuma et al 2010, Newtonraj et al 2017, Patti et al 2020, Tan et al 2017, Thakur et al 2016, Venkatesan et al 2018, Wood et al 2015</b> |
|                                                                                                       | <b>2. Forgetfulness:</b> Patients forget to take medicine because of busy schedule                                                                                            | <b>Dhar et al 2016, Gupta et al 2019, Gupta et al 2020, Rani et al 2019, Venkatesan et al 2018, Wood et al 2015, Tan et al 2017, Thakur et al 2016</b>                                                                       |
|                                                                                                       | <b>3. Misconception about medications:</b> Patient has wrong perception about the medications, especially about its side effects and quality                                  | <b>George et al 2016, Gupta et al 2020, Patti et al 2020, Rani et al 2019, Salaam et al 2019, Tan et al 2017, Venkatesan et al 2018</b>                                                                                      |
|                                                                                                       | <b>4. Preference to alternate system of medicine:</b> Patients prefers taking herbal and other alternate system of medicines for their condition                              | <b>George et al 2016, Tan et al 2017, Venkatesan et al 2018</b>                                                                                                                                                              |
|                                                                                                       | <b>5. Ill effects of substance abuse:</b> Patients have difficulty in adhering to medications during the bout of tobacco or alcohol consumption                               | <b>Jayanna et al 2019, Krishnamoorthy et al 2018</b>                                                                                                                                                                         |
|                                                                                                       | <b>6. Effect of side effects:</b> Patients stop their medication once they develop side effects related to the drugs                                                          | <b>Venkatesan et al 2018, Wood et al 2015</b>                                                                                                                                                                                |
|                                                                                                       | <b>7. Stress:</b> Patients developing stress due to personal or work-related problems are more non-adherent to medications                                                    | <b>Krishnamoorthy et al 2018</b>                                                                                                                                                                                             |
|                                                                                                       | <b>8. Stigma:</b> Patients feel stigmatised in revealing their disease status to other family/friends leading to lack of support from them                                    | <b>Krishnamoorthy et al 2018</b>                                                                                                                                                                                             |
| <b>CARE TEAM<br/>(Frontline care providers - Healthcare professionals, family members and others)</b> | <b>1. Family support:</b> Lack of physical, emotional and social support as the family members are pre-occupied with domestic works, crisis, other priorities and commitments | <b>Dhar et al 2016, George et al 2016, Gupta et al 2020, Krishnamoorthy et al 2018, Kusuma et al 2010, Newtonraj et al 2017, Rani et al 2019, Wood et al 2015</b>                                                            |
|                                                                                                       | <b>2. Risk communication:</b> Poor risk communication or counselling to patients and family members about non-adherence to medication by the treating physicians              | <b>Dhar et al 2016, George et al 2016, Gupta et al 2019, Krishnamoorthy et al 2018, Miller et al 2017, Thakur et al 2016</b>                                                                                                 |
|                                                                                                       | <b>3. Physician attitude:</b> Lack of respect, empathy, communication and attention towards patients by the treating physicians                                               | <b>Dhar et al 2016, Gupta et al 2019, Kusuma et al 2010, Jayanna et al 2019</b>                                                                                                                                              |

|                                                               |                                                                                                                                                                                                                                                 |                                                                                                                                                                                                                                                                                 |
|---------------------------------------------------------------|-------------------------------------------------------------------------------------------------------------------------------------------------------------------------------------------------------------------------------------------------|---------------------------------------------------------------------------------------------------------------------------------------------------------------------------------------------------------------------------------------------------------------------------------|
| <b>HEALTHCARE ORGANIZATION<br/>(Infrastructure/Resources)</b> | <b>1. Affordability:</b> Patients lose their daily wages due to inconvenient consultation timings in public facilities, which is aggravated by travel costs due to poor access, and higher medication costs while preferring private facilities | <b>Agarwal et al 2019, Dhar et al 2016, George et al 2016, Gupta et al 2019, Gupta et al 2020, Jayanna et al 2019, Kusuma et al 2010, Miller et al 2017, Nimesh et al 2019, Salaam et al 2019, Satish et al 2019, Thakur et al 2016, Venkatesan et al 2018, Wood et al 2015</b> |
|                                                               | <b>2. Accessibility:</b> Lack of access to healthcare facilities (more distance) requiring longer travel and waiting time.                                                                                                                      | <b>Dhar et al 2016, George et al 2016, Gupta et al 2019, Gupta et al 2020, Jayanna et al 2019, Krishnamoorthy et al 2018, Kusuma et al 2010, Miller et al 2017, Newtonraj et al 2017, Tan et al 2017, Thakur et al 2016, Venkatesan et al 2018, Wood et al 2015</b>             |
|                                                               | <b>3. Availability:</b> Non-availability of essential medicines in public healthcare facilities                                                                                                                                                 | <b>Dhar et al 2016, Jayanna et al 2019, Kusuma et al 2010, Miller et al 2017, Newtonraj et al 2017, Patti et al 2020, Salaam et al 2019, Wood et al 2015</b>                                                                                                                    |
|                                                               | <b>4. Acceptability:</b> Medications from public health facilities are not acceptable to the patients due to poorer quality                                                                                                                     |                                                                                                                                                                                                                                                                                 |
|                                                               | <b>5. Overburdening of primary health centres:</b> Burdening of primary health facilities lead to time constraints in patient counselling regarding medication adherence                                                                        | <b>Jayanna et al 2019, Krishnamoorthy et al 2018, Miller et al 2017, Patti et al 2020, Venkatesan et al 2018</b>                                                                                                                                                                |

Table 3: Thematic framework for summarizing facilitators in medication adherence experienced by CVD &amp; DM patients in India

| Main theme/Sub-themes                                                                                 | Facilitators in Medication Adherence                                                                                                                                                                                                                    | Studies                                                                                                                   |
|-------------------------------------------------------------------------------------------------------|---------------------------------------------------------------------------------------------------------------------------------------------------------------------------------------------------------------------------------------------------------|---------------------------------------------------------------------------------------------------------------------------|
| <b>PATIENTS</b>                                                                                       | <b>1. Self-awareness and fear:</b> Patient's understanding about medicine adherence and fear about complications of non-adherence keeps them healthy                                                                                                    | <b>Krishnamoorthy et al 2018, Miller et al 2017, Patti et al 2020, Satish et al 2019, Tan et al 2017, Wood et al 2015</b> |
|                                                                                                       | <b>2. Medicine Reminder system:</b> Separate pill boxes/cases/covers, personalized shelf, and maintaining drug record notebook helps them in remembering daily doses                                                                                    | <b>Dhar et al 2016, Krishnamoorthy et al 2018, Miller et al 2017, Tan et al 2017</b>                                      |
|                                                                                                       | <b>3. Integrating drug intake with the daily routine:</b> Fixed time for medicine intake, separate place for keeping drug, and making arrangements during travel helps them in adherence                                                                | <b>Dhar et al 2016, Krishnamoorthy et al 2018</b>                                                                         |
|                                                                                                       | <b>4. Positive peer influence:</b> Good adherence to medication by the patient's peers motivates the patient to be compliance to their own drug intake                                                                                                  | <b>Gupta et al 2019, Krishnamoorthy et al 2018</b>                                                                        |
| <b>CARE TEAM<br/>(Frontline care providers - Healthcare professionals, family members and others)</b> | <b>1. Family support:</b> Constant reminders by family members for drug intake                                                                                                                                                                          | <b>Dhar et al 2016, Gupta et al 2020, Krishnamoorthy et al 2018, Miller et al 2017, Wood et al 2015</b>                   |
|                                                                                                       | <b>2. Past adverse experiences:</b> Death of patients' own family members due to complications of the condition has motivated them to adhere to medication                                                                                              | <b>Dhar et al 2016, Krishnamoorthy et al 2018</b>                                                                         |
|                                                                                                       | <b>3. Healthcare provider counselling and empathy:</b> Patients described that counselling from their healthcare providers has motivated them to remain adherent                                                                                        | <b>Kusuma et al 2010, Miller et al 2017, Patti et al 2020, Salaam et al 2019, Tan et al 2017</b>                          |
|                                                                                                       | <b>4. Trust in physician:</b> Adherence is more when a positive rapport and trust is established between the patient and health care providers.                                                                                                         | <b>Dhar et al 2016, Krishnamoorthy et al 2018, Satish et al 2019</b>                                                      |
| <b>HEALTHCARE ORGANIZATION<br/>(Infrastructure/Resources)</b>                                         | <b>1. Dedicated pill boxes/covers:</b> Provision of different medications in separate boxes/covers in the healthcare facility has helped as the patient to remember which medication to take at what time                                               | <b>Krishnamoorthy et al 2018, Wood et al 2015</b>                                                                         |
|                                                                                                       | <b>2. Combination drugs (polypills):</b> Polypills had the following advantages to facilitate the medication adherence: a smaller number of pills, lower frequency, less chance of forgetting, potential for lower cost, and convenient simpler regimen | <b>Salaam et al 2019, Wood et al 2015</b>                                                                                 |
|                                                                                                       | <b>3. Availability of medications:</b> Proper pharmacy inventory control and stock delivery has aided in medication adherence                                                                                                                           | <b>Miller et al 2017</b>                                                                                                  |
| <b>ENVIRONMENT<br/>(Regulatory, market and policy framework)</b>                                      | <b>1. NGO Support:</b> Patients has reported that sharing their concerns and receiving counselling from NGO/ Health officers acted as a facilitator for drug intake                                                                                     | <b>Tan et al 2017, Wood et al 2015</b>                                                                                    |

**Table 4: Thematic framework for summarizing suggestions to improve medication adherence among CVD & DM patients in India**

| Main theme/Sub-themes                                                                                         | Suggestions to improve medication adherence                                                                                                                                                                                                                                                                                                       | Studies                                                                                                                                                                                                         |
|---------------------------------------------------------------------------------------------------------------|---------------------------------------------------------------------------------------------------------------------------------------------------------------------------------------------------------------------------------------------------------------------------------------------------------------------------------------------------|-----------------------------------------------------------------------------------------------------------------------------------------------------------------------------------------------------------------|
| <b>PATIENTS</b>                                                                                               | <b>1. Peer support groups:</b> Patients can motivate each other by forming support groups among themselves                                                                                                                                                                                                                                        | <b>Krishnamoorthy et al 2018</b>                                                                                                                                                                                |
|                                                                                                               | <b>2. Digital reminder system:</b> Patient can use digital reminders such as watch, mobile phone to adhere to their drug schedule                                                                                                                                                                                                                 | <b>Krishnamoorthy et al 2018, Miller et al 2017</b>                                                                                                                                                             |
| <b>CARE TEAM<br/>(Frontline care providers -<br/>Healthcare professionals,<br/>family members and others)</b> | <b>1. Social support:</b> Family members can be educated and asked to provide support by reinforcing compliance, reminding about drug intake, motivating them patients to avoid substance abuse                                                                                                                                                   | <b>Agarwal et al 2019, Dhar et al 2016, Krishnamoorthy et al 2018, Nimesh et al 2019, Wood et al 2015</b>                                                                                                       |
|                                                                                                               | <b>2. Financial support:</b> Family members can provide financial support to cover the cost of medications, travel etc.                                                                                                                                                                                                                           | <b>Gupta et al 2019</b>                                                                                                                                                                                         |
|                                                                                                               | <b>3. Regular training of healthcare workers:</b> Physicians and other healthcare workers involved in prescribing drugs and counselling should undergo regular training on standard treatment protocols                                                                                                                                           | <b>George et al 2016, Jayanna et al 2019, Miller et al 2017, Patti et al 2020, Satish et al 2019</b>                                                                                                            |
|                                                                                                               | <b>4. Team work approach:</b> Integration of AYUSH, mental health counsellors, physiotherapist and geriatric clinics at primary healthcare level                                                                                                                                                                                                  | <b>George et al 2016, Miller et al 2017, Patti et al 2020</b>                                                                                                                                                   |
| <b>HEALTHCARE ORGANIZATION<br/>(Infrastructure/Resources)</b>                                                 | <b>1. Innovations in patient care:</b> Healthcare workers can make innovations like dedicated day for specific conditions (diabetes day, etc), dedicated counselling station/session with additional staff for detailing the importance of adherence and complications related to non-adherence, unique pill dispensing mechanism (colour coding) | <b>Agarwal et al 2019, Dhar et al 2016, Jayanna et al 2019, Krishnamoorthy et al 2018, Miller et al 2017, Newtonraj et al 2017, Patti et al 2020, Satish et al 2019, Venkatesan et al 2018, Wood et al 2015</b> |
|                                                                                                               | <b>2. IEC/BCC/Awareness campaigns:</b> Putting up of IEC materials and conducting campaigns on importance of adherence in public places and workplaces                                                                                                                                                                                            | <b>Dhar et al 2016, George et al 2016, Gupta et al 2019, Gupta et al 2020, Jayanna et al 2019, Krishnamoorthy et al 2018, Newtonraj et al 2017, Patti et al 2020, Rani et al 2019</b>                           |
|                                                                                                               | <b>3. Digitalizing patient treatment record:</b> Digitalizing a dedicated treatment record for each patient can help in better follow-up of the patient and improve adherence                                                                                                                                                                     | <b>Jayanna et al 2019, Miller et al 2017, Patti et al 2020, Satish et al 2019, Wood et al 2015</b>                                                                                                              |
|                                                                                                               | <b>4. Polypills:</b> Disseminating the advantages of polypills to healthcare professionals by CME/conferences and patients by public education campaigns; Integration of polypills into clinical practice. etc                                                                                                                                    | <b>Salaam et al 2019, Wood et al 2015</b>                                                                                                                                                                       |
| <b>ENVIRONMENT<br/>(Regulatory, market and policy framework)</b>                                              | <b>1. Linkage of health services with NGO and community-based organizations:</b> Community members, volunteers, anganwadi workers, self-help groups and NGO workers can be trained in counselling the patients to improve medication adherence                                                                                                    | <b>Dhar et al 2016, Jayanna et al 2019, Krishnamoorthy et al 2018, Kusuma et al 2010, Miller et al 2017, Tan et al 2017</b>                                                                                     |

1  
2  
3  
4  
5  
6  
7  
8  
9  
10  
11  
12  
13  
14  
15  
16  
17  
18  
19  
20  
21  
22  
23  
24  
25  
26  
27  
28  
29  
30  
31  
32  
33  
34  
35  
36  
37  
38  
39  
40  
41  
42  
43  
44  
45  
46  
47  
48  
49  
50  
51  
52  
53  
54  
55  
56  
57  
58  
59  
60

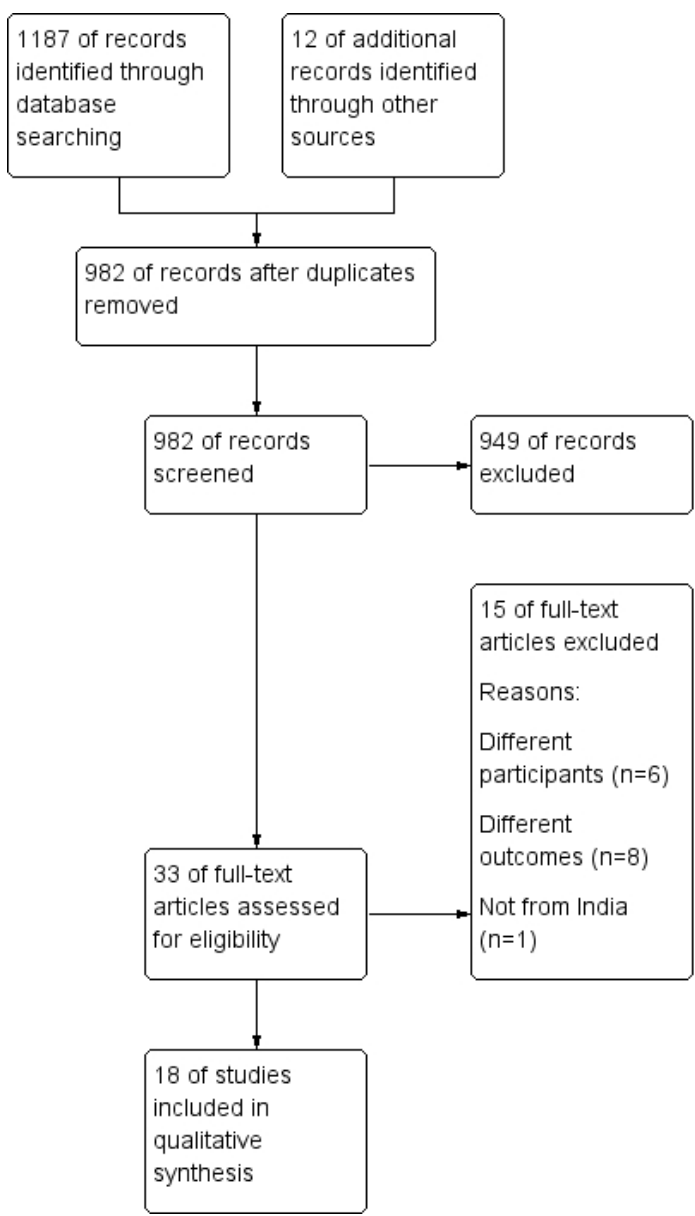

141x246mm (72 x 72 DPI)

**Supplementary Table 1 Search strategy**

| <b>Key word</b>                      | <b>Alternative word</b>                                                                                                                                                                                                                                                                                                                                                                                                                                                                                                                                                     |
|--------------------------------------|-----------------------------------------------------------------------------------------------------------------------------------------------------------------------------------------------------------------------------------------------------------------------------------------------------------------------------------------------------------------------------------------------------------------------------------------------------------------------------------------------------------------------------------------------------------------------------|
| Qualitative studies                  | ((((((((Qualitative Research[MeSH Terms]) OR Focus Groups[MeSH Terms]) OR Anthropology, Cultural[MeSH Terms]) OR Ethnopsychology[MeSH Terms]) OR Grounded Theory[MeSH Terms]) OR Nursing Methodology Research[MeSH Terms]) OR Narrative Medicine[MeSH Terms]) OR Tape Recording[MeSH Terms]) OR Culture[MeSH Terms]) OR Attitude[MeSH Terms] Case studies OR Focused group discussions OR phenomenological studies OR ethnographic studies OR interviews))                                                                                                                  |
| Medication Adherence                 | ((((((((((((((((Medication Adherence[MeSH Terms]) OR Patient Compliance[MeSH Terms]) OR No-Show Patients[MeSH Terms]) OR Health Personnel[MeSH Terms]) OR drug effects [Subheading]) OR (Treatment Adherence[MeSH Terms] OR Compliance[MeSH Terms])) OR Self Medication[MeSH Terms]) OR Self Administration[MeSH Terms]) OR Patient Medication Knowledge[MeSH Terms]) OR Attitude to Health[MeSH Terms]) OR Patient Acceptance of Health Care[MeSH Terms])) OR Patient Preference[MeSH Terms]) OR Patient Acceptance of Health Care[MeSH Terms]) OR Motivation[MeSH Terms]) |
| Barriers, Facilitators and solutions | Challenges OR Challenge OR Problem OR Problems barriers OR Difficulties OR Issues OR Limitations OR Obstacles OR Facilitators OR Suggestions OR Solutions                                                                                                                                                                                                                                                                                                                                                                                                                   |
| Diabetes mellitus and CVDs           | ((((((Diabetes Mellitus[MeSH Terms]) OR Cardiovascular Diseases[MeSH Terms] OR Hypertension[MeSH Terms] OR Coronary Disease[MeSH Terms] OR Coronary Artery Disease[MeSH Terms] OR Heart Diseases[MeSH Terms] OR Cerebrovascular Diseases[MeSH Terms] OR Stroke[MeSH Terms]))                                                                                                                                                                                                                                                                                                |



|       |                                                       |
|-------|-------------------------------------------------------|
| India | (India[MeSH Terms] OR Republic of India[MeSH Terms])) |
|-------|-------------------------------------------------------|

### Search results (PubMed):

(((((Diabetes Mellitus[MeSH Terms]) OR Cardiovascular Diseases[MeSH Terms] OR Hypertension[MeSH Terms])) AND (((((((((((((((Medication Adherence[MeSH Terms]) OR Patient Compliance[MeSH Terms]) OR No-Show Patients[MeSH Terms]) OR Health Personnel[MeSH Terms]) OR drug effects [Subheading]) OR (Treatment Adherence[MeSH Terms] OR Compliance[MeSH Terms])) OR Self Medication[MeSH Terms]) OR Self Administration[MeSH Terms]) OR Patient Medication Knowledge[MeSH Terms]) OR Attitude to Health[MeSH Terms]) OR Patient Acceptance of Health Care[MeSH Terms])) OR Patient Preference[MeSH Terms]) OR Patient Acceptance of Health Care[MeSH Terms]) OR Motivation[MeSH Terms]) OR Life Change Events[MeSH Terms]) OR Trust[MeSH Terms]))) AND (((((((((((Qualitative Research[MeSH Terms]) OR Focus Groups[MeSH Terms]) OR Anthropology, Cultural[MeSH Terms]) OR Ethnopsychology[MeSH Terms]) OR Grounded Theory[MeSH Terms]) OR Nursing Methodology Research[MeSH Terms]) OR Narrative Medicine[MeSH Terms]) OR Tape Recording[MeSH Terms]) OR Culture[MeSH Terms]) OR Attitude[MeSH Terms])) AND (India[MeSH Terms] OR Republic of India[MeSH Terms])) – 199 (Filters: Years between 2010 and 2020 and English language publication)

((((((((((((((Qualitative Research[MeSH Terms]) OR Focus Groups[MeSH Terms]) OR Anthropology, Cultural[MeSH Terms]) OR Ethnopsychology[MeSH Terms]) OR Grounded Theory[MeSH Terms]) OR Nursing Methodology Research[MeSH Terms]) OR Narrative Medicine[MeSH Terms]) OR Tape Recording[MeSH Terms]) OR Culture[MeSH Terms]) OR Attitude[MeSH Terms] Case studies OR Focused group discussions OR phenomenological studies OR ethnographic studies OR interviews))) AND (((((((((((((((Medication Adherence[MeSH Terms]) OR Patient Compliance[MeSH Terms]) OR No-Show Patients[MeSH Terms]) OR Health Personnel[MeSH Terms]) OR drug effects [Subheading]) OR (Treatment Adherence[MeSH Terms] OR Compliance[MeSH Terms])) OR Self Medication[MeSH Terms]) OR Self Administration[MeSH Terms]) OR Patient Medication Knowledge[MeSH Terms]) OR Attitude to Health[MeSH Terms]) OR Patient Acceptance of Health Care[MeSH Terms])) OR Patient Preference[MeSH Terms]) OR Patient Acceptance of Health Care[MeSH Terms]) OR Motivation[MeSH Terms])) AND (Challenges OR Challenge OR Problem OR Problems barriers OR Difficulties OR Issues OR Limitations OR Obstacles OR Facilitators OR Suggestions OR Solutions)) AND ((((((Diabetes Mellitus[MeSH Terms]) OR Cardiovascular Diseases[MeSH Terms] OR Hypertension[MeSH Terms] OR Coronary Disease[MeSH Terms] OR Coronary Artery Disease[MeSH Terms] OR Heart Diseases[MeSH Terms] OR Cerebrovascular Diseases[MeSH Terms] OR Stroke[MeSH Terms]))) AND ((India[MeSH Terms] OR Republic of India[MeSH Terms])) – 31 results (Filters: Years between 2010 and 2020 and English language publication)

**Google scholar:** 635 + 22 + 6 + 12 = 675

1  
2  
3 **ScienceDirect:** (Diabetes Mellitus OR Cardiovascular Diseases OR Hypertension) AND  
4 (Qualitative Study OR Qualitative) AND (India) AND (Adherence) – 238 articles  
5

6 **Cochrane library:** (Diabetes Mellitus OR Cardiovascular Diseases OR Hypertension) AND  
7 (Qualitative Study OR Qualitative) AND (India) AND (Adherence) – 34 articles  
8  
9  
10  
11  
12  
13  
14  
15  
16  
17  
18  
19  
20  
21  
22  
23  
24  
25  
26  
27  
28  
29  
30  
31  
32  
33  
34  
35  
36  
37  
38  
39  
40  
41  
42  
43  
44  
45  
46  
47  
48  
49  
50  
51  
52  
53  
54  
55  
56  
57  
58  
59  
60

For peer review only

S1 Table. Enhancing transparency in reporting the synthesis of qualitative research: ENTREQ Checklist (Tong, *et al.*, 2012)

| Item No.                      | Guide and Description                                                                                                                                                                                                                                                                                                                                                                          | Report Location                          |
|-------------------------------|------------------------------------------------------------------------------------------------------------------------------------------------------------------------------------------------------------------------------------------------------------------------------------------------------------------------------------------------------------------------------------------------|------------------------------------------|
| 1. Aim                        | State the research question the synthesis addresses                                                                                                                                                                                                                                                                                                                                            | P 6, 1-13                                |
| 2. Synthesis methodology      | Identify the synthesis methodology or theoretical framework which underpins the synthesis, and describe the rationale for choice of methodology (e.g. meta-ethnography, thematic synthesis, critical interpretive synthesis, grounded theory synthesis, realist synthesis, meta-aggregation, meta-study, framework synthesis)                                                                  | P9, 16-25<br>P10, 1-22                   |
| 3. Approach to searching      | Indicate whether the search was pre-planned (comprehensive search strategies to seek all available studies) or iterative (to seek all available concepts until they theoretical saturation is achieved)                                                                                                                                                                                        | P8, 1-10                                 |
| 4. Inclusion criteria         | Specify the inclusion/exclusion criteria (e.g. in terms of population, language, year limits, type of publication, study type)                                                                                                                                                                                                                                                                 | P7, 3-23                                 |
| 5. Data sources               | Describe the information sources used (e.g. electronic databases (MEDLINE, EMBASE, CINAHL, psycINFO), grey literature databases (digital thesis, policy reports), relevant organisational websites, experts, information specialists, generic web searches (Google Scholar) hand searching, reference lists) and when the searches conducted; provide the rationale for using the data sources | P8, 1-10                                 |
| 6. Electronic Search strategy | Describe the literature search (e.g. provide electronic search strategies with population terms, clinical or health topic terms, experiential or social phenomena related terms, filters for qualitative research, and search limits)                                                                                                                                                          | Supplementary file 1                     |
| 7. Study screening methods    | Describe the process of study screening and sifting (e.g. title, abstract and full text review, number of independent reviewers who screened studies)                                                                                                                                                                                                                                          | Figure 1                                 |
| 8. Study characteristics      | Present the characteristics of the included studies (e.g. year of publication, country, population, number of participants, data collection, methodology, analysis, research questions)                                                                                                                                                                                                        | Table 1                                  |
| 9. Study selection results    | Identify the number of studies screened and provide reasons for study exclusion (e.g. for comprehensive searching, provide numbers of studies screened and reasons for exclusion indicated in a figure/flowchart; for iterative searching describe reasons for study exclusion and inclusion based on modifications to the research question and/or contribution to theory development)        | Fig 1 - PRISMA flow diagram<br>P11, 6-18 |
| 10. Rationale for appraisal   | Describe the rationale and approach used to appraise the included studies or selected findings (e.g. assessment of conduct (validity and robustness),                                                                                                                                                                                                                                          | P11, 14-18<br>Table 1                    |

|                          |                                                                                                                                                                                                                                                                                             |                              |
|--------------------------|---------------------------------------------------------------------------------------------------------------------------------------------------------------------------------------------------------------------------------------------------------------------------------------------|------------------------------|
|                          | assessment of reporting (transparency), assessment of content and utility of the findings)                                                                                                                                                                                                  |                              |
| 11. Appraisal items      | State the tools, frameworks and criteria used to appraise the studies or selected findings (e.g. Existing tools: CASP, QARI, COREQ, Mays and Pope [25]; reviewer developed tools; describe the domains assessed: research team, study design, data analysis and interpretations, reporting) | P9, 3-14<br>Table 1          |
| 12. Appraisal process    | Indicate whether the appraisal was conducted independently by more than one reviewer and if consensus was required                                                                                                                                                                          | P8, 11-17                    |
| 13. Appraisal results    | Present results of the quality assessment and indicate which articles, if any, were weighted/excluded based on the assessment and give the rationale                                                                                                                                        | P11, 14-18<br>Table 1        |
| 14. Data extraction      | Indicate which sections of the primary studies were analysed and how were the data extracted from the primary studies? (e.g. all text under the headings "results /conclusions" were extracted electronically and entered into a computer software)                                         | P8, 18-25                    |
| 15. Software             | State the computer software used, if any                                                                                                                                                                                                                                                    | None used                    |
| 16. Number of reviewers  | Identify who was involved in coding and analysis                                                                                                                                                                                                                                            | P9, 16-22                    |
| 17. Coding               | Describe the process for coding of data (e.g. line by line coding to search for concepts)                                                                                                                                                                                                   | P9, 23-35<br>P10, 1-22       |
| 18. Study comparison     | Describe how were comparisons made within and across studies (e.g. subsequent studies were coded into pre-existing concepts, and new concepts were created when deemed necessary)                                                                                                           | Table 2                      |
| 19. Derivation of themes | Explain whether the process of deriving the themes or constructs was inductive or deductive                                                                                                                                                                                                 | Inductive process<br>Table 2 |
| 20. Quotations           | Provide quotations from the primary studies to illustrate themes/constructs, and identify whether the quotations were participant quotations of the author's interpretation                                                                                                                 | Table 2                      |
| 21. Synthesis output     | Present rich, compelling and useful results that go beyond a summary of the primary studies (e.g. new interpretation, models of evidence, conceptual models, analytical framework, development of a new theory or construct)                                                                | P11-14                       |

# BMJ Open

**Patient and Provider's perspective on barriers and facilitators for medication adherence among adult patients with Cardiovascular Diseases and Diabetes Mellitus in India – A qualitative evidence synthesis**

|                                 |                                                                                                                                                                                                                      |
|---------------------------------|----------------------------------------------------------------------------------------------------------------------------------------------------------------------------------------------------------------------|
| Journal:                        | <i>BMJ Open</i>                                                                                                                                                                                                      |
| Manuscript ID                   | bmjopen-2021-055226.R2                                                                                                                                                                                               |
| Article Type:                   | Original research                                                                                                                                                                                                    |
| Date Submitted by the Author:   | 15-Dec-2021                                                                                                                                                                                                          |
| Complete List of Authors:       | Krishnamoorthy, Yuvaraj; JIPMER PSM, Rajaa, Sathish; Jawaharlal Institute of Postgraduate Medical Education, Rehman, Tanveer; PGIMER Thulasingam, Mahalakshmi ; JIPMER, Department of Preventive and Social Medicine |
| <b>Primary Subject Heading</b>: | Diabetes and endocrinology                                                                                                                                                                                           |
| Secondary Subject Heading:      | Cardiovascular medicine, Diabetes and endocrinology                                                                                                                                                                  |
| Keywords:                       | QUALITATIVE RESEARCH, PREVENTIVE MEDICINE, PRIMARY CARE, Coronary heart disease < CARDIOLOGY, DIABETES & ENDOCRINOLOGY                                                                                               |
|                                 |                                                                                                                                                                                                                      |

SCHOLARONE™  
Manuscripts



I, the Submitting Author has the right to grant and does grant on behalf of all authors of the Work (as defined in the below author licence), an exclusive licence and/or a non-exclusive licence for contributions from authors who are: i) UK Crown employees; ii) where BMJ has agreed a CC-BY licence shall apply, and/or iii) in accordance with the terms applicable for US Federal Government officers or employees acting as part of their official duties; on a worldwide, perpetual, irrevocable, royalty-free basis to BMJ Publishing Group Ltd ("BMJ") its licensees and where the relevant Journal is co-owned by BMJ to the co-owners of the Journal, to publish the Work in this journal and any other BMJ products and to exploit all rights, as set out in our [licence](#).

The Submitting Author accepts and understands that any supply made under these terms is made by BMJ to the Submitting Author unless you are acting as an employee on behalf of your employer or a postgraduate student of an affiliated institution which is paying any applicable article publishing charge ("APC") for Open Access articles. Where the Submitting Author wishes to make the Work available on an Open Access basis (and intends to pay the relevant APC), the terms of reuse of such Open Access shall be governed by a Creative Commons licence – details of these licences and which [Creative Commons](#) licence will apply to this Work are set out in our licence referred to above.

Other than as permitted in any relevant BMJ Author's Self Archiving Policies, I confirm this Work has not been accepted for publication elsewhere, is not being considered for publication elsewhere and does not duplicate material already published. I confirm all authors consent to publication of this Work and authorise the granting of this licence.

1  
2  
3 1 **Patient and Provider's perspective on barriers and facilitators for medication adherence**  
4  
5 2 **among adult patients with Cardiovascular Diseases and Diabetes Mellitus in India – A**  
6  
7 3 **qualitative evidence synthesis**

8  
9  
10 4 **Running head:** Barriers and facilitators for medication adherence among CVD and DM  
11  
12 5 patients in India

13  
14  
15 6 **Article category:** Systematic Review

16  
17 7 **Yuvaraj Krishnamoorthy<sup>1</sup>, Sathish Rajaa<sup>2</sup>, Tanveer Rehman<sup>3</sup>, Mahalakshmi**  
18  
19 8 **Thulasingam<sup>4</sup>**

20  
21 9 <sup>1</sup>Assistant Professor, Department of Community Medicine, ESIC Medical College & PGIMSR,  
22  
23  
24 10 K.K. Nagar, Chennai, India;

25  
26 11 **Contact Number:** +91 9551892665

27  
28 12 **Email id:** [yuvi.1130@gmail.com](mailto:yuvi.1130@gmail.com)

29  
30  
31 13 <sup>2</sup>Assistant Professor, Department of Community Medicine, ESIC Medical College & PGIMSR,  
32  
33 14 K.K. Nagar, Chennai, India;

34  
35 15 **Contact Number:** +91 9791974633

36  
37 16 **Email id:** [psrajaa2410@gmail.com](mailto:psrajaa2410@gmail.com)

38  
39  
40 17 <sup>3</sup>Independent Author, Kolkata, West Bengal, India

41  
42 18 **Contact Number:** +91 8336922482

43  
44 19 **Email id:** [drtanveerrehman@gmail.com](mailto:drtanveerrehman@gmail.com)

45  
46  
47 20 <sup>4</sup>Associate Professor, Department of Preventive and Social Medicine, Jawaharlal Institute of of  
48  
49 21 Postgraduate Medical Education and Research (JIPMER), Puducherry - 605006, India;

50  
51 22 **Contact Number:** +91 9488729774

52  
53 23 **Email id:** [mahalakshmi.dr@gmail.com](mailto:mahalakshmi.dr@gmail.com)

54  
55 24 **Corresponding Author:**

56  
57  
58 25 Dr Sathish Rajaa,

1  
2  
3 1 Assistant Professor,  
4  
5 2 Department of Community Medicine,  
6  
7 3 ESIC Medical College & PGIMSR, K.K. Nagar, Chennai, India

8  
9  
10 4 **Contact Number:** +91 9791974633

11  
12 5 **Email id:** psrajaa2410@gmail.com

13  
14 6 **Abstract:**

15  
16 7 **Objective:**

17  
18 8 To explore the various stakeholders' perspectives on barriers and facilitators for medication  
19  
20 9 adherence among CVD and DM patients in India.

21  
22 10 **Methods:**

23  
24 11 A comprehensive systematic search was conducted in Medline, Cochrane library, Science  
25  
26 12 Direct and Google Scholar from January 2010 to July 2020. We used the framework of the  
27  
28 13 systems approach for healthcare delivery to conduct thematic analysis, using published  
29  
30 14 qualitative literature to derive relevant themes, sub-themes and codes.

31  
32 15 **Setting:** A Qualitative Evidence Synthesis of qualitative published studies from India

33  
34 16 **Subjects:** A Qualitative Evidence Synthesis of the available qualitative evidence on the  
35  
36 17 barriers and facilitating factors for medication adherence among CVD and DM patients in India

37  
38 18 **Results:**

39  
40 19 In total, 18 studies were included. Major barriers reported were lack of understanding about  
41  
42 20 the disease, complications related to non-adherence, followed by forgetfulness, lack of family  
43  
44 21 support and risk communication. Health system-related barriers such as accessibility,  
45  
46 22 affordability, and acceptability were also reported by majority of the studies. Creation of peer  
47  
48 23 support group, digital reminder system, integration of AYUSH, mental health, physiotherapy  
49  
50 24 and geriatric clinics at primary healthcare level and innovations in patient care were suggested  
51  
52 25 to counter these barriers in medication adherence.



1  
2  
3 1 **Conclusion:**  
4

5 2 Such patient-specific targeted interventions need to be developed to achieve better control  
6  
7  
8 3 among CVD and DM patients.  
9

10 4 **Keywords:** Cardiovascular Diseases, Diabetes Mellitus, Medication Adherence, Qualitative  
11  
12 5 Research  
13

14  
15 6 **Strengths and Limitations:**  
16

- 17 7 1. This is the first review exploring factors associated with drug adherence among CVD  
18  
19 8 & DM patients in India  
20  
21 9 2. We have adhered to the ENTREQ statement ensuring transparency and reproducibility  
22  
23  
24 10 of the study findings.  
25  
26 11 3. We cannot rule out of the dissemination bias with respect to accurate and complete  
27  
28 12 representation of the phenomenon of interest.  
29  
30  
31 13 4. We focussed primarily on the patient and provider perspective on medication  
32  
33 14 adherence. Hence, we cannot comment on the organizational or political influences on  
34  
35 15 the adherence to long-term therapies.  
36  
37  
38 16 5. The sample size of the included studies can be considered relatively low (median  
39  
40 17 sample size - 30).  
41  
42  
43 18  
44  
45 19  
46  
47 20  
48  
49 21  
50  
51 22  
52  
53  
54  
55  
56  
57  
58  
59  
60

## 1 INTRODUCTION

2 Cardiovascular diseases (CVDs) are the leading cause of mortality globally and in India.<sup>1,2</sup>  
3 More than a quarter (28%) of all deaths in India are attributable to CVDs with Ischemic heart  
4 disease (IHD) and stroke constituting the majority (83%).<sup>3</sup> On the other hand, India ranks  
5 second after China in the global diabetes epidemic, with a prevalence of around 10%.<sup>4</sup> Both  
6 diabetes mellitus (DM) and hypertension have long been recognized as independent risk factors  
7 for CVDs, whereas adherence to prescribed hypoglycaemic and antihypertensive drug  
8 therapies have significantly reduced the risk.<sup>5-8</sup> At least half of hypertensive & DM patients  
9 stop taking their medication within a year, often without informing their provider. With further  
10 nonadherence and attrition over time, medication adherence has emerged as a significant public  
11 health priority.<sup>9</sup>

12 Medication adherence is defined as the extent to which a person's behaviour coincides with the  
13 agreed medication regimen or health advice from a health care provider.<sup>10</sup> It has three  
14 components: initiation (when the patient takes the first dose of prescribed medication),  
15 implementation (the extent to which a patient's actual dosing corresponds to the prescribed  
16 dosing regimen), and discontinuation (when no more doses are taken after that).<sup>11</sup> Medication  
17 adherence is of growing interest to clinicians, healthcare systems, and other stakeholders (e.g.,  
18 payers). There is soaring evidence that establishes nonadherence is often associated with lower  
19 quality of life, adverse clinical events, increased need for medical interventions, mortality, and  
20 thus giving rise to avoidable out-of-pocket expenditure in health.<sup>12</sup> Non-adherent hypertensive  
21 and stable coronary heart disease (CHD) patients have a four to five times higher risk of  
22 developing CHD and death, when compared to adherent patients.<sup>13,14</sup> Similarly, the likelihood  
23 of hospitalization is doubled among DM & hypertensive patients who are non-adherent to  
24 prescribed therapies compared to the general population. Despite recent advancements in  
25 pharmacologic treatment and technology to treat and monitor DM and CVD patients,

1 medication adherence is of particular concern in low-and-middle-income countries (LMIC)  
2 like India, where accessibility and affordability are still issues.<sup>3,15</sup>  
3 Barriers to adherence can be comprehended as the patient, medication, provider, and health  
4 system factors, with interactions among them.<sup>16,17</sup> Patient factors that influence adherence  
5 include poor health literacy, cultural beliefs regarding medication effectiveness, and religious  
6 healing practices.<sup>17</sup> Low income, forgetting to take medication, and perceptions regarding pills  
7 like safety concerns, convenience, and necessity add to the above list.<sup>16,17</sup> Inadequate  
8 knowledge about a drug and its use, not being convinced of the need for medication, fear of  
9 adverse effects, and long-term treatment regimens also prompt medication discontinuation.<sup>15</sup>  
10 Clinician factors cover failure to recognize nonadherence, prescription of complex and  
11 multidrug regimens, ineffective communication of benefits of medications, and excluding  
12 patients in the treatment decision-making process.<sup>17</sup> Health system factors comprise limited  
13 insurance coverage, poor coordination of care between inpatient and outpatient settings, and  
14 inadequate communication between prescribers (i.e., specialists and primary care clinicians).  
15 In addition, the caregivers' aspect also becomes relevant in determining patients' adherence as  
16 CVD patients with a caregiver are more likely to be adherent to medications.<sup>18</sup> Hence  
17 identifying specific barriers for each patient and adopting suitable techniques to overcome them  
18 is imperative to improve medication adherence. Some of the facilitators successful in  
19 overcoming these barriers include a personal medication counsellor in the care continuum to  
20 guide patients with medication use, single-pill fixed-dose combinations, training pharmacists  
21 as coaches for drug therapies, building peer groups for chronic conditions, and developing  
22 information systems in the follow-up of patients.<sup>19</sup>  
23 Quantitative studies have focused on medication adherence incidence and identification of its  
24 potential risk factors. They do not, however, uncover life circumstances that may influence  
25 adherence from the patient perspective. The inclusion of qualitative studies in our review will

1  
2  
3 1 provide a better understanding of the barriers and facilitators from the perspective and  
4  
5 2 experiences of patients, healthcare providers, and caregivers.<sup>20</sup> Qualitative evidence synthesis,  
6  
7 3 a novel research method, brings together the available qualitative evidence from primary  
8  
9 4 studies through a systematic review process. Despite the evidence obtained from primary  
10  
11 5 qualitative studies could be conceptually richer, a qualitative evidence synthesis can aid us in  
12  
13 6 getting an overall view of the findings, and help us in addressing subtle and sensitive issues  
14  
15 7 that most primary studies encounter. The findings from a qualitative evidence synthesis can  
16  
17 8 guide us in crucial making policy recommendations in health care, retaining the impact of  
18  
19 9 individual studies and group experiences. <sup>21</sup> Therefore, the current review was done to  
20  
21 10 understand the perspective of various stakeholders (patients, caregivers, and healthcare  
22  
23 11 providers) on the barriers and facilitators for medication adherence among CVD and DM  
24  
25 12 patients in India. We also explored the suggestions and solutions provided by these  
26  
27 13 stakeholders in overcoming the reported barriers.  
28  
29  
30  
31  
32  
33

## 34 **METHODS**

35  
36  
37 15 This review was performed by adhering to the “enhancing transparency in reporting the  
38  
39 16 synthesis of qualitative research (ENTREQ)” statement. (Supplementary file 2) <sup>22</sup> We  
40  
41 17 registered our protocol in the PROSPERO database (Registration number -  
42  
43 18 CRD42020199529). We also searched PROSPERO and Cochrane to ensure that no similar  
44  
45 19 review protocol has been reported. We also performed a preliminary search to ensure that no  
46  
47 20 previous reviews of our similar topic targeting the Indian population were published.  
48  
49

### 50 **Study design**

51  
52 22 We performed an evidence synthesis of the available qualitative evidence on the barriers and  
53  
54 23 facilitating factors for medication adherence among CVD and DM patients. This review would  
55  
56  
57  
58  
59  
60

1 help to aggregate the evidence of peer-reviewed articles in this field and build an organized  
2 empirical research outline based on prior knowledge.

### 3 ***Eligibility criteria***

#### 4 *Study type*

5 We have included qualitative peer-reviewed studies conducted in India for our current review.  
6 Furthermore, qualitative evidence from other mixed methods studies was screened for  
7 eligibility and included in the qualitative component was relevant to our review. In addition,  
8 we included studies using qualitative techniques for data collection such as focussed group  
9 discussion (FGD), in-depth interviews (IDI), and Key Informant Interviews (KII).

#### 10 *Participant type*

11 We have included the studies reporting the barriers and facilitators of medication adherence  
12 from patients' perspectives (CVD and DM), family members, healthcare workers (HCWs), or  
13 health system policymakers in India. HCWs were defined as per WHO recommendation as "all  
14 the persons involved in the actions whose primary intent is to enhance the health."<sup>23</sup>

#### 15 *Outcome*

16 The phenomenon of interest in our review was to explore the barriers and facilitators for  
17 medication adherence among CVD and DM patients in India. We also explored the possible  
18 suggestions and solutions to address the barriers and improve compliance, as experienced by  
19 the patients, caregivers, family members, HCWs, and other relevant stakeholders.

### 20 ***Exclusion criteria***

21 We have excluded the studies not available in English, books or conference abstracts or grey  
22 literature, or editorial comments. We have also excluded the studies reporting only quantitative  
23 data such as cross-sectional surveys, case-control, cohort studies, or intervention trials.

#### 24 **Search strategy**

1  
2  
3 1 We have conducted a comprehensive and systematic search in databases and search engines  
4  
5 2 such as Medline, Cochrane library, ScienceDirect, and Google Scholar. A combination of  
6  
7 3 medical subject heading (MeSH) and free-full text terms was used for carrying out a literature  
8  
9 4 search. The detailed search strategy and search results in the databases mentioned above and  
10  
11 5 search engines are provided in Supplementary File 1. In addition to this, we also checked the  
12  
13 6 reference list of primary studies obtained via electronic search and included articles relevant to  
14  
15 7 our review and analysis. The search was conducted in all the databases from January 2010 to  
16  
17 8 July 2020 with English language restriction for publication. Furthermore, the search timeline  
18  
19 9 was restricted to ensure that our work provides a broader view and identifies the emerging  
20  
21 10 issues.

### 26 11 **Study selection process**

28 12 Two investigators (YK and TR) independently performed the literature search, screened the  
29  
30 13 title and abstract of all the identified studies, and retrieved the full text for articles relevant to  
31  
32 14 our review. Further full-text screening of the retrieved articles was done again independently  
33  
34 15 by the two investigators (YK, TR) to select the studies matching the eligibility criteria of our  
35  
36 16 review. Disagreements during this process between the two investigators were resolved  
37  
38 17 through consultation with a third investigator (SR).

### 42 18 **Data Extraction and Management**

44 19 After the study selection, two investigators (YK and TR) independently extracted the relevant  
45  
46 20 data and study characteristics onto a predetermined data extraction format. Data entry was  
47  
48 21 double-checked for accuracy by a third investigator (SR) by comparing the data presented in  
49  
50 22 the review and individual study reports. As a result, we have extracted the following study  
51  
52 23 characteristics: general information such as the name of the first author, the country in which  
53  
54 24 the study was done, and year of publication, in the methods section, data collection period,  
55  
56 25 study design, study participants, sample size, sampling technique, and data collection  
57  
58  
59  
60

1 procedure. In addition, barriers, facilitators, suggestions, and solutions to medication adherence  
2 were identified systematically.

### 3 **Quality assessment**

4 Two investigators (YK and SR) independently performed the quality check using the Critical  
5 Appraisal Skills Programme (CASP) criteria.<sup>24</sup> This checklist has been widely used for  
6 assessing the quality of studies included in this Qualitative Evidence synthesis.<sup>25</sup> This has  
7 helped determine whether the studies included are coherent with the quality appraisal standard  
8 for qualitative studies. This checklist consists of 10 questions concerning the study's clarity,  
9 methodology, and results to rank the included studies. Subsequently, these studies were  
10 stratified into high quality (three stars for studies scoring 8 to 10 points), medium quality (two  
11 stars for studies scoring 4 to 7 points), and low rate (one star for studies scoring 0 to 3 points).  
12 We did not exclude the low-quality studies, but the interpretation of results was made with  
13 caution. Disagreements during the quality assessment process were resolved by discussion with  
14 the third investigator (TR).

### 15 **Data Analysis**

16 We analysed and reported the findings in separate clusters such as patients, caregivers, family  
17 members, HCWs, and policymakers to demonstrate the differences among these subgroups.  
18 We have adopted a thematic framework analysis to analyse and synthesize the data. Thematic  
19 framework analysis has been helpful as the evidence was primarily descriptive and improved  
20 our understanding of the barriers and facilitators in medication adherence among CVD and DM  
21 patients. This framework synthesis has five stages of synthesizing the qualitative data.

22 ***First stage - Familiarisation with the data:*** Primary investigator (YK) did the process of  
23 familiarisation with data by reviewing all the selected articles against the objective of our  
24 review and found the recurrent themes across the included studies.

1  
2  
3 1 **The second stage - Identifying the thematic framework:** The investigators used a  
4  
5 2 predetermined thematic framework developed using literature to guide the thematic analysis.  
6  
7 3 The final framework comprised of a detailed list of facilitators and barriers for medication  
8  
9 4 adherence and also solutions to address the issue.

10  
11  
12 5 **Third stage - Indexing:** Two independent investigators (YK and SR) read the extracted  
13  
14 6 information and searched for themes as per the predetermined thematic framework and found  
15  
16 7 additional emerging themes. The framework underwent several revisions as and when a new  
17  
18 8 theme emerged. This has been performed through discussion and agreement between the entire  
19  
20 9 team of investigators. Next, all the studies were completely read and examined till there was  
21  
22 10 no new emergent theme. Coding of the data was then done as per the themes identified in our  
23  
24 11 analysis. Finally, each preliminary study indexing was done using the codes related to the  
25  
26 12 thematic framework. Whenever appropriate, sections of the studies were indexed with one or  
27  
28 13 more codes.

29  
30  
31  
32  
33 14 **Fourth stage - Charting:** The investigators have sorted the data based on the themes and  
34  
35 15 presented these themes in the tabular format (chart). The rows and columns of the table indicate  
36  
37 16 the themes related to the studies, which enabled us to compare the study findings across various  
38  
39 17 themes and subthemes.

40  
41  
42 18 **Fifth stage - Mapping and interpretation:** The investigators used these charts to define the  
43  
44 19 concepts identified, and mapped the nature and range of the phenomena. Our review explored  
45  
46 20 the associations between the various themes and helped in clarifying the findings. Finally, we  
47  
48 21 mapped and interpreted the findings in line with our objectives and emergent themes.

## 22 **Ethical considerations**

23  
24 23 Approval from an ethics committee is not required since our review included only publicly  
25  
26 24 available data without involving the human participants directly.



## 1 **Patient and Public Involvement:**

2 Patients or the public were not involved in the design, or conduct, or reporting, or dissemination  
3 plans of our research.

## 4 **Results**

### 5 **Study selection**

6 A comprehensive and systematic search was done to identify the relevant studies from January  
7 2010 to July 2020. In total, we identified 1187 citations, and after the removal of duplicates  
8 from multiple databases, 982 records were screened for their title and abstract and assessed for  
9 eligibility. From these records, we retrieved 33 articles, and after going through the full text of  
10 these articles, 18 studies were included in the review. (**Figure 1**).<sup>26-43</sup>

### 11 **Characteristics of the studies included**

12 Characteristics of the included studies are reported in **Table 1**. Of the 18 studies included, 9  
13 (50%) were from the Southern region, followed by 7 (38%) from the Northern part of India.  
14 The mean age of the participants ranged from 25-76 years. The typology of the studies  
15 comprised of in-depth interviews (IDIs) and focussed group discussions (FGDs). The study  
16 participants were primarily patients with diabetes, hypertension, or any cardiovascular diseases  
17 (to explore the patient perspective), and health care workers (4 studies) providing care to them  
18 (to obtain the provider perspective). The total sample size of the included studies ranged from  
19 6 to 100. The majority (10 of the included studies) were done in a community setting, while  
20 the rest were either facility-based or had participants from ongoing trials. Four of the included  
21 studies used software for analysing the qualitative data, while the rest followed manual  
22 methods. Most of the included studies (14 out of 18) had higher ratings indicating high-quality  
23 evidence.

### 24 **Narrative synthesis**

1  
2  
3 1 Significant findings from the review showed that factors contributory to adherence come under  
4  
5 2 three themes: patient-related, family-related, and health system-related factors. The barriers,  
6  
7 3 facilitators, and suggestions to improve medication adherence were summarized under these  
8  
9 4 three themes.

### 5 **Barriers in medication adherence**

6 **Table-2** shows the thematic framework analysis related to barriers in medication adherence  
7 among CVD and DM patients. All the 18 included studies have explored and reported on these  
8 barriers.

#### 9 *Patient-related factors*

10 Significant patient-related barriers (10 studies) reported were lack of knowledge or  
11 understanding about the disease, its complications related to nonadherence, and the treatment  
12 schedule, followed by forgetfulness to take medicine (7 studies). Reasons provided for the same  
13 were the patients' busy schedule, laziness, or forgetting to take the medication while traveling  
14 out-of-station. Patients have also reported certain misconceptions about the medicines like the  
15 risk of long-term neurological illness because of medication intake, inferior quality of drugs  
16 provided in hospitals, and wrong perception about stopping the medications once the patient  
17 feels normal. Patients in some studies have reported that they practice alternate systems of  
18 medicine such as herbal medicines and avoid taking allopathic medicines leading to poorer  
19 control of their condition. Substance use such as alcohol or tobacco use, side effects related to  
20 drugs, stress, and stigma were reported to be other barriers

#### 21 *Family-related factors*

22 The patients and providers have reported a lack of family support as a significant contributing  
23 factor for nonadherence. In addition, the lack of social and emotional support to the patients  
24 further contributes to the nonadherence among the patients suffering from CVDs and DM.

1  
2  
3 1 Domestic works, personal priorities, commitments, or other issues hinder the family members  
4  
5 2 from providing the above-mentioned support to the patients.  
6

### 7 3 *Health system-related factors*

8  
9  
10 4 In most of these studies, providers were also interviewed to understand the factors related to  
11  
12 5 the health system responsible for nonadherence among CVD and DM patients. Healthcare  
13  
14 6 providers and patients interviewed, in almost all these studies, have reported affordability,  
15  
16 7 accessibility, and acceptability as the major factors hindering medication adherence.  
17  
18 8 Affordability is an issue with patients seeking healthcare in private facilities and patients  
19  
20 9 getting care in public healthcare facilities. Though there was no direct medical cost related to  
21  
22 10 government hospitals or primary healthcare centres, direct non-medical costs such as transport  
23  
24 11 (due to poor accessibility) and indirect costs such as loss of wages (due to inconvenient  
25  
26 12 consultation timing) were higher amongst these patients. In addition, patients have a wrong  
27  
28 13 perception that medications in public facilities are of poorer quality, making them choose  
29  
30 14 private health facilities, including those belonging to lower socioeconomic status. Lack of risk  
31  
32 15 communication, counselling, or empathy by the physicians mainly due to overburdening public  
33  
34 16 health facilities and time constraints were the other health system-related barriers reported by  
35  
36 17 the providers and patients.  
37  
38  
39

### 40 18 **Facilitators in medication adherence**

41  
42  
43 19 Facilitators in medication adherence were also summarized using the pre-existing thematic  
44  
45 20 framework (**Table-3**). In total, ten studies have explored the facilitators in medication  
46  
47 21 adherence from the patient or providers' perspective.  
48  
49

### 50 22 *Patient-related factors*

51  
52  
53 23 Most of the studies (5 studies) reported fear of complications due to nonadherence and self-  
54  
55 24 perception of being healthy (once they adhere to the medications) as the significant facilitators.  
56  
57 25 In addition, having a reminder system in the form of a reminder notebook, separate  
58  
59  
60

1 pillboxes/cases/covers, or personalized shelf facilitates the patients in adhering to the  
2 medications. Some studies have also reported that integrating drug intake into daily routine  
3 activities and peer influence acts as a good facilitator in compliance with medications.

#### 4 *Family-related factors*

5 Family support was reported as a major facilitating factor for compliance with medication.  
6 Apart from the support, adverse experiences in the past, such as death or severe complications  
7 among the family members, instilled fear in the patients, making them more compliant to the  
8 medications.

#### 9 *Health system-related factors*

10 Barriers reported in some of the studies, such as empathy and counselling by healthcare  
11 providers, were considered facilitators by the other studies' patients. Another major facilitator  
12 from the health system side is the trust that patient has in their physician and their willingness  
13 to effectively follow advice related to self-care and adherence. Other familiar facilitators  
14 reported by the patients and providers were the use of dedicated pill cover/boxes for each drug  
15 provided in the clinic, linkage of health services with NGO for provision of counselling and  
16 generating awareness, availability of medication, and use of polypills.

#### 17 **Suggestions to improve medication adherence**

18 Suggestions and solutions to enhance the compliance to medication were reported in 16 out of  
19 the 18 included studies based on either patient or provider's perspective (**Table-4**). Few  
20 suggestions were related to patients and family members, while the majority were related to  
21 the change in the health system.

#### 22 *Patient and family-related factors*

23 Creating or joining a peer support group was one of the major suggestions related to the  
24 patients. This will help by motivating the patients to be more compliant with medications and

1 other self-care practices. Digital reminder systems using a watch and a mobile phone can also  
2 improve medication adherence.

### 3 *Health system-related factors*

4 Innovations in patient care, have been necessitated as an important factor to promote drug  
5 adherence. Some of the innovations suggested were dedicated days for specific disease  
6 conditions to avoid overburdening the facilities, a dedicated counselling station for drug  
7 adherence during the clinic with separate human resources, and a unique pill dispensing  
8 mechanism like colour coding, etc. In addition, Information Education and Communication  
9 (IEC)/Behaviour change communication (BCC) campaigns, digitalizing the patient treatment  
10 records, linkage of healthcare services with NGOs or community-based organizations, regular  
11 training of healthcare workers, and promotion of polypill use were other common suggestions  
12 offered by the healthcare providers.

## 13 **Discussion**

14 We conducted this review to integrate the qualitative evidence on barriers and facilitators for  
15 medication adherence among CVD and DM patients in India. We also further explored the  
16 suggestions to improve the same. The studies included in our review involved a total of 636  
17 participants (534 CVD and DM patients, 102 healthcare providers). The majority of the  
18 included studies were of high quality concerning study clarity, methodology, and results. We  
19 summarized under three major themes: barriers, facilitators, suggestions and reported the  
20 findings under the following four sub-themes: patients, care team, healthcare organization, and  
21 environment-related factors.

### 22 *Comparison of findings with previous literature*

#### 23 *Barriers in medication adherence*

24 Major barriers were lack of patient's understanding about the disease and its complications,  
25 forgetfulness, and misconception about the medications. Lack of family support was seen as a

1 major barrier from both patient's and provider's perspectives. In addition to these factors, stress  
2 and stigma were also mentioned as important factors among patients to not take medicine on  
3 time. In addition to the above, medication adherence could also be highly hindered by the  
4 patients' cultural beliefs, perceived discrimination, and social customs, which are highly  
5 prevalent in a culturally influenced country like India. A few studies have also shown evidence  
6 of improvement in medication adherence where efforts were taken to overcome the cultural  
7 barriers.<sup>44</sup> We also found major health system-related barriers were lack of accessibility and  
8 availability, higher cost of medications, and poor physician attitude. These findings were in  
9 line with the previous review conducted among South-East Asian DM patients.<sup>44,46</sup> In addition,  
10 our findings of patients related factors were found to be similar to other patients belonging to  
11 non-English speaking Hispanic, South American ethnic groups, as they also had  
12 misconceptions related to therapy, lack of understanding about their condition, with additional  
13 stress and stigma as a factor for non-adherence.<sup>47-49</sup>

#### 14 *Facilitators in medication adherence*

15 Fear of complications, self-perception of being healthy, having a reminder system was reported  
16 as major facilitators by patients. Physician trust, advice, empathy, and counselling were the  
17 other provider-related facilitators in adhering to medications. Common facilitators as reported  
18 by the patients and providers were: dedicated pill cover/boxes for each drug provided in the  
19 clinic, availability of medication, and use of polypills. These findings were also in line with the  
20 previous qualitative reviews conducted in low middle-income countries including India.<sup>47-50</sup>

#### 21 *Suggestions to improve medication adherence*

22 The solutions provided by the patients and health professionals were in line with the barriers  
23 identified in our review. Proper physician counselling to make the patients understand their  
24 own condition, complications of the disease and avoid misconception about the drugs and their  
25 side effects, good family support, making the medication accessible and available free of cost

1 were suggested as major suggestions to improve medication adherence. Similar interventions  
2 were also suggested by previous qualitative evidence on medication adherence among CVD  
3 and DM patients.<sup>45-49</sup> It is also interesting to note that medication adherence is also hurdled by  
4 the patients' intention towards adherence, and this intention might vary across nations and  
5 cultural groups. The patient's intention not to refill prescriptions due to cost, not to take  
6 medication because the patient feels better, also influences the patient's decision. Thus future  
7 research exploring these reasons on patient's choice to adhere or not, rather than an inability to  
8 adhere (e.g., forgetting, no access) needs to be encouraged.

### 9 *Strengths and limitations of the study*

10 To the best of our knowledge, this is the first review exploring and synthesizing the qualitative  
11 factors associated with medication adherence among CVD and DM patients in India. We have  
12 provided comprehensive and systematic evidence on the barriers, facilitators related to  
13 medication adherence, adhering to the ENTREQ statement, and ensuring transparency and  
14 reproducibility. We examined this evidence through the lenses of a well-established theoretical  
15 framework model. Moreover, our study was able to provide valuable suggestions to promote  
16 medication adherence from both patient's and provider's perspectives. In addition to these  
17 strengths, we found that the highest-rated studies contributed to the majority of the factors  
18 found in our review. This in turn ensures the transferability (external validity) of our review  
19 findings.

20 However, our review has certain limitations. We did not search grey literature, possibly missing  
21 some insights for our review. Hence, we cannot rule out the dissemination bias for an accurate  
22 and complete representation of the phenomenon of interest. We focussed primarily on the  
23 patient and provider perspective on medication adherence.<sup>51</sup> Hence, we cannot comment on the  
24 organizational or political influences on the adherence to long-term therapies as mentioned in  
25 the WHO report.<sup>16</sup> The sample size of the included studies can be considered relatively low

1 (median sample size - 30). However, all the studies were conducted till the achievement of data  
2 saturation. In addition to the above, these results and suggestions need to be considered after  
3 taking into account India's cross-cultural adaptations, customs, linguistic variations, and  
4 genetic susceptibility, and higher prevalence of risk factor profile.

#### 5 *Implications for clinical and public health practice*

6 Improving medication adherence is essential to achieve better control and prevent life-  
7 threatening complications. Factors related to patients such as self-awareness and fear about the  
8 condition and its complications acted as a major facilitator for medication adherence. We also  
9 found more modifiable barriers related to medication intakes such as forgetfulness, lack of  
10 knowledge, and misconception about medications. Interventions should focus on these  
11 modifiable barriers such as knowledge barriers, intention barriers, and health system-related  
12 barriers to achieve better adherence. In addition, the family members need to help the patients  
13 in mapping their daily routine and link the medicine intake with these routines to facilitate  
14 adherence. Our review also suggested that healthcare providers play an important role in  
15 promoting medication adherence. Hence, the interventions should not only target the patients  
16 but also the family members and healthcare providers and they should be tailored to suit  
17 differences in setting, culture, and type of the patients.

#### 18 *Implications for future research*

19 More evidence needs to be generated concerning the solutions obtained in our review such as  
20 memory tools including the digital solutions, polypills, peer support groups, etc. Further  
21 qualitative studies including the subgroup of patients with CVD and DM under different stages  
22 and treatment regimens are required to contextualize the medication adherence. Exploring the  
23 barriers using a theoretical framework with the same methodological approach, can provide  
24 more reliable evidence to develop patient-centered interventions and achieve better control  
25 among CVD and DM patients.



1  
2  
3 **1 Conclusion:**  
4

5  
6 2 In our review, we categorised the facilitating factors and barriers influencing medication  
7  
8 3 adherence into patient-related, health system-related, and care team-related factors. Thus, we  
9  
10 4 advocate the creation of peer support groups, the use of a digital reminder system for  
11  
12 5 overcoming patients related factors, and integration of AYUSH services, mental health,  
13  
14 6 physiotherapy, and geriatric clinics even at the primary healthcare level for overcoming the  
15  
16 7 health system-related barriers towards medication adherence.  
17  
18

19  
20 8 **Funding:** None  
21

22  
23 9 **Competing interests statement:** None declared  
24

25  
26 10 **Acknowledgements:** None  
27

28 11 **Author contribution statement:** Conceived and designed the study: YK & SR, Data  
29  
30 12 management and extraction: YK, SR & TR, Analysed the data and wrote the paper: SR, YK  
31  
32 13 & TR. Provided comments and inputs to revise the manuscript: SR, YK, TR & MT  
33

34 14 **Data sharing statement:** The authors confirm that the data supporting the findings of this  
35  
36 15 study are available within the article  
37  
38

39 16 **References:**  
40

- 41 17 1. Walker IF, Garbe F, Wright J, Newell I, Athiraman N, Khan N, et al. The Economic  
42  
43 18 Costs of Cardiovascular Disease, Diabetes Mellitus, and Associated Complications in  
44  
45 19 South Asia: A Systematic Review. *Value Health Reg Issues*. 2018;15:12–26.  
46  
47  
48 20 2. Glovaci D, Fan W, Wong ND. Epidemiology of Diabetes Mellitus and Cardiovascular  
49  
50 21 Disease. *Curr Cardiol Rep*. 2019;21:21.  
51  
52  
53 22 3. Prabhakaran D, Jeemon P, Sharma M, Roth GA, Johnson C, Harikrishnan S, et al. The  
54  
55 23 changing patterns of cardiovascular diseases and their risk factors in the states of India:  
56  
57 24 the Global Burden of Disease Study 1990–2016. *Lancet Glob Health*. 2018;6:e1339–  
58  
59 25 51.  
60

- 1 4. Tandon N, Anjana RM, Mohan V, Kaur T, Afshin A, Ong K, et al. The increasing  
2 burden of diabetes and variations among the states of India: the Global Burden of  
3 Disease Study 1990–2016. *Lancet Glob Health*. 2018;6:e1352–62.
- 4 5. Durand H, Hayes P, Morrissey EC, Newell J, Casey M, Murphy AW, et al. Medication  
5 adherence among patients with apparent treatment-resistant hypertension: systematic  
6 review and meta-analysis. *J Hypertens*. 2017;35:2346–57.
- 7 6. Polypharmacy and Medication Adherence in Patients With Type 2 Diabetes | Diabetes  
8 Care [Internet]. [cited 2020 Jul 30]. Available from:  
9 <https://care.diabetesjournals.org/content/26/5/1408.short>
- 10 7. Vrijens B, Antoniou S, Burnier M, de la Sierra A, Volpe M. Current Situation of  
11 Medication Adherence in Hypertension. *Front Pharmacol* [Internet]. 2017 [cited 2020  
12 Jul 31];8. Available from:  
13 <https://www.frontiersin.org/articles/10.3389/fphar.2017.00100/full>
- 14 8. Rehman T, Rajaa S, Kumar G, Jayalakshmy R. Prevalence and factors influencing  
15 diabetes among persons with type 2 diabetes mellitus in urban Puducherry: A cross-  
16 sectional analytical study. *Indian J Community Med*. 2020 Jul;45(3):315.
- 17 9. Polonsky WH, Henry RR. Poor medication adherence in type 2 diabetes: recognizing  
18 the scope of the problem and its key contributors. *Patient Prefer Adherence*.  
19 2016;10:1299–307.
- 20 10. Leporini C, De Sarro G, Russo E. Adherence to therapy and adverse drug reactions: is  
21 there a link? *Expert Opin Drug Saf*. 2014;13 Suppl 1:S41-55.
- 22 11. Lam WY, Fresco P. Medication Adherence Measures: An Overview. *BioMed Res Int*.  
23 2015; 2015:1–12.
- 24 12. Kvarnström K, Airaksinen M, Liira H. Barriers and facilitators to medication  
25 adherence: a qualitative study with general practitioners. *BMJ Open*. 2018;8:e015332.

- 1  
2  
3 1 13. Ferdinand KC, Senatore FF, Clayton-Jeter H, Cryer DR, Lewin JC, Nasser SA, et al.  
4  
5 2 Improving Medication Adherence in Cardiometabolic Disease. *J Am Coll Cardiol*.  
6  
7 3 2017;69:437–51.  
8  
9
- 10 4 14. Krueger KP, Berger BA, Felkey B. Medication adherence and persistence: a  
11  
12 5 comprehensive review. *Adv Ther*. 2005;22:313–56.  
13
- 14 6 15. Dennis T, Meera NK, Binny K, Sekhar MS, Kishore G, Sasidharan S. Medication  
15  
16 7 adherence and associated barriers in hypertension management in India. *CVD Prev*  
17  
18 8 *Control*. 2011 Jan 1;6(1):9-13.  
19
- 20 9 16. Miller NH, Hill M, Kottke T, Ockene IS. The multilevel compliance challenge:  
21  
22 10 recommendations for a call to action. A statement for healthcare professionals.  
23  
24 11 *Circulation*. 1997;95:1085–90.  
25
- 26 12 17. WHO | ADHERENCE TO LONG-TERM THERAPIES: EVIDENCE FOR ACTION  
27  
28 13 [Internet]. WHO. World Health Organization; [cited 2020 Jul 30]. Available from:  
29  
30 14 [http://www.who.int/chp/knowledge/publications/adherence\\_report/en/](http://www.who.int/chp/knowledge/publications/adherence_report/en/)  
31  
32
- 33 15 18. Aggarwal B, Liao M, Mosca L. Medication Adherence Is Associated with Having a  
34  
35 16 Caregiver Among Cardiac Patients. *Ann Behav Med Publ Soc Behav Med*.  
36  
37 17 2013;46:237–42.  
38
- 39 18 19. Daliri S, Bekker CL, Buurman BM, Scholte op Reimer WJM, van den Bemt BJB,  
40  
41 19 Karapinar – Çarkit F. Barriers and facilitators with medication use during the transition  
42  
43 20 from hospital to home: a qualitative study among patients. *BMC Health Serv Res*. 2019;  
44  
45 21 19:204.  
46  
47
- 48 22 20. Rathbone AP, Todd A, Jamie K, Bonam M, Banks L, Husband AK. A systematic  
49  
50 23 review and thematic synthesis of patients' experience of medicines adherence. *Res*  
51  
52 24 *Social Admin Pharm*. 2017 May 1;13(3):403-39.  
53  
54  
55  
56  
57  
58  
59  
60

- 1  
2  
3 1 21. Flemming K, Booth A, Garside R, Tunçalp Ö, Noyes J. Qualitative evidence synthesis  
4  
5 2 for complex interventions and guideline development: clarification of the purpose,  
6  
7 3 designs and relevant methods. *BMJ Global Health*. 2019 Jan 1;4(Suppl 1):e000882.  
8  
9  
10 4 22. Tong A, Flemming K, McInnes E, Oliver S, Craig J. Enhancing transparency in  
11  
12 5 reporting the synthesis of qualitative research: ENTREQ. *BMC Med Res Methodol*.  
13  
14 6 2012; 12:181  
15  
16  
17 7 23. Mohanty A, Kabi A, Mohanty AP. Health problems in healthcare workers: A review. *J*  
18  
19 8 *Family Med Primary Care*. 2019 Aug;8(8):2568.  
20  
21  
22 9 24. Critical Appraisal Skills Programme (2018). CASP (Qualitative) Checklist. [online]  
23  
24 10 Available at: [https://casp-uk.net/wp-content/uploads/2018/01/CASP-Qualitative-](https://casp-uk.net/wp-content/uploads/2018/01/CASP-Qualitative-Checklist-2018.pdf)  
25  
26 11 [Checklist-2018.pdf](https://casp-uk.net/wp-content/uploads/2018/01/CASP-Qualitative-Checklist-2018.pdf) Accessed: 12 September 2020  
27  
28  
29 12 25. Booth A, Noyes J, Flemming K, Gerhardus A, Wahlster P, van der Wilt GJ, et al.  
30  
31 13 Structured methodology review identified seven (RETREAT) criteria for selecting  
32  
33 14 qualitative evidence synthesis approaches. *J Clin Epidemiol*. 2018 Jul 1;99:41-52.  
34  
35  
36 15 26. Agarwal A, Davies D, Goenka S, Prabhakaran D, Huffman MD, Mohanan PP.  
37  
38 16 Facilitators and barriers of heart failure care in Kerala, India: A qualitative analysis of  
39  
40 17 healthcare providers and administrators. *Indian Heart J*. 2019; 71(3):235–41.  
41  
42  
43 18 27. Dhar L. Perceptions of global coronary heart disease risk, and adherence to  
44  
45 19 antihypertensive treatment among low income urban women in Delhi, India (Doctoral  
46  
47 20 dissertation, Curtin University).  
48  
49  
50 21 28. George CE, Ramadas D, Norman G, Mukherjee D, Rao T. Barriers to cardiovascular  
51  
52 22 disease risk reduction: Does physicians' perspective matter? *Indian Heart J*. 2016;  
53  
54 23 68(3):278–85  
55  
56  
57  
58  
59  
60

- 1  
2  
3 1 29. Gupta S, Dhamija JP, Mohan I, Gupta R. Qualitative Study of Barriers to Adherence to  
4  
5 2 Antihypertensive Medication among Rural Women in India. *Int J Hypertens.* 2019;  
6  
7 3 2019:1–7.  
8  
9  
10 4 30. Gupta S, Virk A, Mittal A, Agarwal B. Patterns and determinants of healthcare-seeking  
11  
12 5 behavior among hypertensive patients in a rural population of north India: A mixed-  
13  
14 6 method study. *J Family Med Prim Care.* 2020; 9(6):2830  
15  
16  
17 7 31. Jayanna K, Swaroop N, Kar A, Ramanaik S, Pati MK, Pujar A, et al. Designing a  
18  
19 8 comprehensive Non-Communicable Diseases (NCD) programme for hypertension and  
20  
21 9 diabetes at primary health care level: evidence and experience from urban Karnataka,  
22  
23 10 South India. *BMC Public Health.* 2019; 19:1  
24  
25  
26 11 32. Krishnamoorthy Y, Giriappa DK, Eliyas SK, Priyan S, Saya GK, Lakshminarayanan  
27  
28 12 S. Patient and Provider's Experience and Perspective in Addressing Barriers to  
29  
30 13 Medication Adherence Among Noncommunicable Disease Patients in Rural  
31  
32 14 Puducherry, South India—A Qualitative Study. *J Patient Exp.* 2019; 6(3):216–23  
33  
34  
35 15 33. Kusuma YS. Migrants' Perceptions on Barriers to Treatment Seeking for Hypertension:  
36  
37 16 A Qualitative Study from Delhi, India. *Studies on Ethno-Medicine.* 2010; 4(3):173–6  
38  
39  
40 17 34. Miller V, Nambiar L, Saxena M, Leong D, Banerjee A et al. Exploring the barriers to  
41  
42 18 and facilitators of using evidence-based drugs in the secondary prevention of  
43  
44 19 cardiovascular diseases: findings from a multistakeholder, qualitative analysis. *Global*  
45  
46 20 *Heart.* 2018; 13(1):27-34.  
47  
48  
49 21 35. Newtonraj A, Arun S, Bazroy J, Tovia S. Lay perspectives on causes and complications  
50  
51 22 of hypertension; and barrier to access health care by known hypertensive patients: a  
52  
53 23 qualitative study from a rural area of South India. *Int J Community Med Public Health.*  
54  
55 24 2017; 4(3):704  
56  
57  
58  
59  
60

- 1  
2  
3 1 36. Nimesh VV, Halder A, Mitra A, Kumar S, Joshi A, Joshi R, et al. Patterns of healthcare  
4 seeking behavior among persons with diabetes in Central India: A mixed method study.  
5  
6 2  
7  
8 3  
9  
10 4 37. Pati S, Van den Akker M, Schellevis FF, Sahoo K, Burgers JS. Managing diabetes  
11  
12 5  
13  
14 6  
15  
16  
17 7  
18  
19 8 38. Anitha Rani M, Shriram V. Are Patients With Type 2 Diabetes Not Aware or Are They  
20  
21 9  
22  
23  
24 10  
25  
26 11 39. Salam A, Praveen D, Patel A, Tewari A, Webster R. Barriers and facilitators to the use  
27  
28 12  
29  
30  
31 13  
32  
33 14 40. Satish P, Khetan A, Barbhaya D, Agarwal M, Mohan SK, Josephson R, Webel AR. A  
34  
35 15  
36  
37  
38 16  
39  
40 17 41. Thakur JS, Vijayvergiya R, Jaswal N, Ginsburg A. Assessment and barriers to  
41  
42 18  
43  
44  
45 19  
46  
47 20  
48  
49 21 42. Venkatesan M, Dongre AR, Ganapathy K. A community-based study on diabetes  
50  
51 22  
52  
53  
54 23  
55  
56  
57  
58  
59  
60

- 1  
2  
3 1 43. Wood F, Salam A, Singh K, Day S, Jan S, Prabhakaran D, et al. Process evaluation of  
4  
5 2 the impact and acceptability of a polypill for prevention of cardiovascular disease. *BMJ*  
6  
7 3 *Open*. 2015; 5(9):e008018  
8  
9  
10 4 44. Saha S, Korthuis PT, Cohn JA, Sharp VL, Moore RD, Beach MC. Primary care  
11  
12 5 provider cultural competence and racial disparities in HIV care and outcomes. *J Gen*  
13  
14 6 *Intern Med*. 2013;28(5):622-9. <https://doi.org/10.1007/s11606-012-2298-8>.  
15  
16  
17 7 45. Sohal T, Sohal P, King-Shier KM, Khan NA. Barriers and Facilitators for Type-2  
18  
19 8 Diabetes Management in South Asians: A Systematic Review. *PLoS ONE*. 2015; 10(9):  
20  
21 9 e0136202.  
22  
23  
24 10 46. Sears K, Scobie A, MacKinnon NJ. Patient-related risk factors for self-reported  
25  
26 11 medication errors in hospital and community settings in 8 countries. *Can Pharm J:*  
27  
28 12 *Revue des Pharmaciens du Canada*. 2012 Mar;145(2):88-93.  
29  
30  
31 13 47. Nam S, Chesla C, Stotts NA, Kroon L, Janson SL. Barriers to diabetes management:  
32  
33 14 patient and provider factors. *Diabetes Res Clin Pract*. 2011; 93(1):1–9  
34  
35 15 48. Lipton RB, Losey LM, Giachello A, Mendez J, Girotti MH. Attitudes and issues in  
36  
37 16 treating Latino patients with type 2 diabetes: views of healthcare providers. *Diabetes*  
38  
39 17 *Educ*. 1998; 24: 67–71  
40  
41  
42 18 49. Sridharan SG, Chittem M, Maya S. Patients' Experiences of Barriers and Facilitators  
43  
44 19 for Adherence to Type 2 Diabetes Mellitus: A Meta-Ethnography. *Journal of Social*  
45  
46 20 *Health and Diabetes*. 2019 Dec;7(02):61-72.  
47  
48  
49 21 50. Al Hamid A, Ghaleb M, Aljadhey H, et al. A systematic review of qualitative research  
50  
51 22 on the contributory factors leading to medicine-related problems from the perspectives  
52  
53 23 of adult patients with cardiovascular diseases and diabetes mellitus. *BMJ Open* 2014;  
54  
55 24 4:e005992.  
56  
57  
58  
59  
60

1  
2  
3  
4  
5  
6  
7  
8  
9  
10  
11  
12  
13  
14  
15  
16  
17  
18  
19  
20  
21  
22  
23  
24  
25  
26  
27  
28  
29  
30  
31  
32  
33  
34  
35  
36  
37  
38  
39  
40  
41  
42  
43  
44  
45  
46  
47  
48  
49  
50  
51  
52  
53  
54  
55  
56  
57  
58  
59  
60

1           51. Toews I, Booth A, Berg RC et al. Further exploration of dissemination bias in  
2           qualitative research required to facilitate assessment within qualitative evidence  
3           synthesis. J Clin Epidemiol 2017; 88:133–139

5   **Figure 1: Flow chart showing the search strategy and selection of studies**

For peer review only



**Table 1: Characteristics of the studies included (N=18)**

| S.No | Author and year           | State      | Data collection method | Study participants                                                 | Study setting   | Approach    | Coding    | Theoretical framework used | Method of analysis      | Sample size         | Mean Age in years             | Study quality |
|------|---------------------------|------------|------------------------|--------------------------------------------------------------------|-----------------|-------------|-----------|----------------------------|-------------------------|---------------------|-------------------------------|---------------|
| 1.   | Agarwal 2019              | Kerala     | IDI                    | Clinical and administrative staff                                  | Facility based  | NR          | Inductive | NR                         | Dedoose Software        | 21                  | NR                            | ***           |
| 2.   | Dhar et al 2016           | Delhi      | IDI                    | Hypertensive women aged 35-59 years                                | Community based | NR          | Inductive | Yes                        | Manual content analysis | 30                  | 48                            | ***           |
| 3.   | George et al 2016         | Karnataka  | IDI                    | Physicians providing Non communicable disease care                 | Community based | NR          | Inductive | NR                         | Manual content analysis | 36                  | 46                            | ***           |
| 4.   | Gupta et al 2019          | Rajasthan  | IDI                    | Hypertensive women                                                 | Facility based  | NR          | NR        | NR                         | Manual content analysis | 30                  | 56                            | **            |
| 5.   | Gupta et al 2020          | Haryana    | IDI                    | Hypertension patients                                              | Facility based  | NR          | NR        | NR                         | Manual content analysis | 100                 | 38-76                         | ***           |
| 6.   | Jayanna et al 2019        | Karnataka  | IDI & FGD              | Diabetes and Hypertension patients                                 | Facility based  | NR          | NR        | Yes                        | Manual content analysis | 10 IDI + 20 FGDs    | NR                            | ***           |
| 7.   | Krishnamoorthy et al 2018 | Puducherry | IDI & KII              | Diabetes and Hypertension patients & Healthcare workers            | Community based | NR          | Inductive | NR                         | Manual content analysis | 6 IDI + 4 KII       | NR                            | ***           |
| 8.   | Kusuma et al 2010         | Delhi      | KII & FGD              | Recent and Settled Migrants having hypertension inhabited in Delhi | Community based | NR          | NR        | NR                         | Manual content analysis | 14 (KII) + 20 (FGD) | 38 – 50 (KII) & 25 – 40 (FGD) | ***           |
| 9.   | Miller et al 2017         | Delhi      | IDI                    | Cardiovascular disease patients                                    | Trial based     | Descriptive | NR        | NR                         | Manual content analysis | 14                  | NR                            | ***           |
| 10.  | Newtonraj et al 2017      | Tamil Nadu | Personal interviews    | Hypertensive patients                                              | Community based | NR          | NR        | NR                         | Manual content analysis | 40                  | NR                            | **            |

|     |                          |                        |           |                                               |                    |             |           |     |                              |    |    |     |
|-----|--------------------------|------------------------|-----------|-----------------------------------------------|--------------------|-------------|-----------|-----|------------------------------|----|----|-----|
| 11. | Nimesh et al<br>2019     | Madhya<br>Pradesh      | IDI       | Individuals with diabetes                     | Community<br>based | NR          | Inductive | Yes | Manual content<br>analysis   | 60 | 52 | *** |
| 12. | Patti et al 2020         | Orissa                 | IDI       | Primary care physicians                       | Facility<br>based  | NR          | NR        | NR  | Manual content<br>analysis   | 17 | 40 | *** |
| 13. | Rani et al 2019          | Tamil Nadu             | FGD       | Individuals with diabetes                     | Community<br>based | Descriptive | NR        | NR  | Manual content<br>analysis   | 50 | 50 | **  |
| 14. | Salaam et al<br>2019     | Andhra<br>Pradesh      | IDI       | Patients with<br>Cardiovascular disease       | Community<br>based | NR          | NR        | Yes | NVivo version 11<br>software | 12 | 62 | *** |
| 15. | Satish et al 2019        | West<br>Bengal         | FGD       | Patients with hypertension<br>and/or diabetes | Trial based        | NR          | NR        | Yes | Manual content<br>analysis   | 70 | 53 | *** |
| 16. | Thakur et al<br>2016     | Chandigarh             | IDI & FGD | Coronary artery disease<br>patients           | Facility<br>based  | NR          | NR        | NR  | Manual Thematic<br>analysis  | 20 | NR | *   |
| 17. | Venkatesan et al<br>2018 | Tamil Nadu             | IDI       | Health care workers                           | Community<br>based | NR          | NR        | NR  | Anthropac<br>software        | 10 | NR | *** |
| 18. | Wood et al 2015          | Hyderabad<br>and Delhi | IDI       | Patients with<br>Cardiovascular diseases      | Trial based        | NR          | NR        | Yes | NVivo software               | 52 | 57 | *** |

NR – Not Reported

IDI – In depth Interview

FGD – Focussed Group Discussion

KII – Key informant interview

Table 2: Thematic framework analysis for summarizing barriers in medication adherence experienced by CVD &amp; DM patients in India

| Main theme/Sub-themes                                                                                 | Barriers in Medication Adherence                                                                                                                                              | Studies                                                                                                                                                                                                                      |
|-------------------------------------------------------------------------------------------------------|-------------------------------------------------------------------------------------------------------------------------------------------------------------------------------|------------------------------------------------------------------------------------------------------------------------------------------------------------------------------------------------------------------------------|
| <b>PATIENTS</b>                                                                                       | <b>1. Lack of awareness/knowledge:</b> Lack of knowledge and understanding about the disease, its complications and treatment among the patients                              | <b>Dhar et al 2016, George et al 2016, Gupta et al 2019, Krishnamoorthy et al 2018, Kusuma et al 2010, Newtonraj et al 2017, Patti et al 2020, Tan et al 2017, Thakur et al 2016, Venkatesan et al 2018, Wood et al 2015</b> |
|                                                                                                       | <b>2. Forgetfulness:</b> Patients forget to take medicine because of busy schedule                                                                                            | <b>Dhar et al 2016, Gupta et al 2019, Gupta et al 2020, Rani et al 2019, Venkatesan et al 2018, Wood et al 2015, Tan et al 2017, Thakur et al 2016</b>                                                                       |
|                                                                                                       | <b>3. Misconception about medications:</b> Patient has wrong perception about the medications, especially about its side effects and quality                                  | <b>George et al 2016, Gupta et al 2020, Patti et al 2020, Rani et al 2019, Salaam et al 2019, Tan et al 2017, Venkatesan et al 2018</b>                                                                                      |
|                                                                                                       | <b>4. Preference to alternate system of medicine:</b> Patients prefers taking herbal and other alternate system of medicines for their condition                              | <b>George et al 2016, Tan et al 2017, Venkatesan et al 2018</b>                                                                                                                                                              |
|                                                                                                       | <b>5. Ill effects of substance abuse:</b> Patients have difficulty in adhering to medications during the bout of tobacco or alcohol consumption                               | <b>Jayanna et al 2019, Krishnamoorthy et al 2018</b>                                                                                                                                                                         |
|                                                                                                       | <b>6. Effect of side effects:</b> Patients stop their medication once they develop side effects related to the drugs                                                          | <b>Venkatesan et al 2018, Wood et al 2015</b>                                                                                                                                                                                |
|                                                                                                       | <b>7. Stress:</b> Patients developing stress due to personal or work-related problems are more non-adherent to medications                                                    | <b>Krishnamoorthy et al 2018</b>                                                                                                                                                                                             |
|                                                                                                       | <b>8. Stigma:</b> Patients feel stigmatised in revealing their disease status to other family/friends leading to lack of support from them                                    | <b>Krishnamoorthy et al 2018</b>                                                                                                                                                                                             |
| <b>CARE TEAM<br/>(Frontline care providers - Healthcare professionals, family members and others)</b> | <b>1. Family support:</b> Lack of physical, emotional and social support as the family members are pre-occupied with domestic works, crisis, other priorities and commitments | <b>Dhar et al 2016, George et al 2016, Gupta et al 2020, Krishnamoorthy et al 2018, Kusuma et al 2010, Newtonraj et al 2017, Rani et al 2019, Wood et al 2015</b>                                                            |
|                                                                                                       | <b>2. Risk communication:</b> Poor risk communication or counselling to patients and family members about non-adherence to medication by the treating physicians              | <b>Dhar et al 2016, George et al 2016, Gupta et al 2019, Krishnamoorthy et al 2018, Miller et al 2017, Thakur et al 2016</b>                                                                                                 |
|                                                                                                       | <b>3. Physician attitude:</b> Lack of respect, empathy, communication and attention towards patients by the treating physicians                                               | <b>Dhar et al 2016, Gupta et al 2019, Kusuma et al 2010, Jayanna et al 2019</b>                                                                                                                                              |

|                                                               |                                                                                                                                                                                                                                                 |                                                                                                                                                                                                                                                                                 |
|---------------------------------------------------------------|-------------------------------------------------------------------------------------------------------------------------------------------------------------------------------------------------------------------------------------------------|---------------------------------------------------------------------------------------------------------------------------------------------------------------------------------------------------------------------------------------------------------------------------------|
| <b>HEALTHCARE ORGANIZATION<br/>(Infrastructure/Resources)</b> | <b>1. Affordability:</b> Patients lose their daily wages due to inconvenient consultation timings in public facilities, which is aggravated by travel costs due to poor access, and higher medication costs while preferring private facilities | <b>Agarwal et al 2019, Dhar et al 2016, George et al 2016, Gupta et al 2019, Gupta et al 2020, Jayanna et al 2019, Kusuma et al 2010, Miller et al 2017, Nimesh et al 2019, Salaam et al 2019, Satish et al 2019, Thakur et al 2016, Venkatesan et al 2018, Wood et al 2015</b> |
|                                                               | <b>2. Accessibility:</b> Lack of access to healthcare facilities (more distance) requiring longer travel and waiting time.                                                                                                                      | <b>Dhar et al 2016, George et al 2016, Gupta et al 2019, Gupta et al 2020, Jayanna et al 2019, Krishnamoorthy et al 2018, Kusuma et al 2010, Miller et al 2017, Newtonraj et al 2017, Tan et al 2017, Thakur et al 2016, Venkatesan et al 2018, Wood et al 2015</b>             |
|                                                               | <b>3. Availability:</b> Non-availability of essential medicines in public healthcare facilities                                                                                                                                                 | <b>Dhar et al 2016, Jayanna et al 2019, Kusuma et al 2010, Miller et al 2017, Newtonraj et al 2017, Patti et al 2020, Salaam et al 2019, Wood et al 2015</b>                                                                                                                    |
|                                                               | <b>4. Acceptability:</b> Medications from public health facilities are not acceptable to the patients due to poorer quality                                                                                                                     |                                                                                                                                                                                                                                                                                 |
|                                                               | <b>5. Overburdening of primary health centres:</b> Burdening of primary health facilities lead to time constraints in patient counselling regarding medication adherence                                                                        | <b>Jayanna et al 2019, Krishnamoorthy et al 2018, Miller et al 2017, Patti et al 2020, Venkatesan et al 2018</b>                                                                                                                                                                |

Table 3: Thematic framework for summarizing facilitators in medication adherence experienced by CVD &amp; DM patients in India

| Main theme/Sub-themes                                                                                 | Facilitators in Medication Adherence                                                                                                                                                                                                                    | Studies                                                                                                                   |
|-------------------------------------------------------------------------------------------------------|---------------------------------------------------------------------------------------------------------------------------------------------------------------------------------------------------------------------------------------------------------|---------------------------------------------------------------------------------------------------------------------------|
| <b>PATIENTS</b>                                                                                       | <b>1. Self-awareness and fear:</b> Patient's understanding about medicine adherence and fear about complications of non-adherence keeps them healthy                                                                                                    | <b>Krishnamoorthy et al 2018, Miller et al 2017, Patti et al 2020, Satish et al 2019, Tan et al 2017, Wood et al 2015</b> |
|                                                                                                       | <b>2. Medicine Reminder system:</b> Separate pill boxes/cases/covers, personalized shelf, and maintaining drug record notebook helps them in remembering daily doses                                                                                    | <b>Dhar et al 2016, Krishnamoorthy et al 2018, Miller et al 2017, Tan et al 2017</b>                                      |
|                                                                                                       | <b>3. Integrating drug intake with the daily routine:</b> Fixed time for medicine intake, separate place for keeping drug, and making arrangements during travel helps them in adherence                                                                | <b>Dhar et al 2016, Krishnamoorthy et al 2018</b>                                                                         |
|                                                                                                       | <b>4. Positive peer influence:</b> Good adherence to medication by the patient's peers motivates the patient to be compliance to their own drug intake                                                                                                  | <b>Gupta et al 2019, Krishnamoorthy et al 2018</b>                                                                        |
| <b>CARE TEAM<br/>(Frontline care providers - Healthcare professionals, family members and others)</b> | <b>1. Family support:</b> Constant reminders by family members for drug intake                                                                                                                                                                          | <b>Dhar et al 2016, Gupta et al 2020, Krishnamoorthy et al 2018, Miller et al 2017, Wood et al 2015</b>                   |
|                                                                                                       | <b>2. Past adverse experiences:</b> Death of patients' own family members due to complications of the condition has motivated them to adhere to medication                                                                                              | <b>Dhar et al 2016, Krishnamoorthy et al 2018</b>                                                                         |
|                                                                                                       | <b>3. Healthcare provider counselling and empathy:</b> Patients described that counselling from their healthcare providers has motivated them to remain adherent                                                                                        | <b>Kusuma et al 2010, Miller et al 2017, Patti et al 2020, Salaam et al 2019, Tan et al 2017</b>                          |
|                                                                                                       | <b>4. Trust in physician:</b> Adherence is more when a positive rapport and trust is established between the patient and health care providers.                                                                                                         | <b>Dhar et al 2016, Krishnamoorthy et al 2018, Satish et al 2019</b>                                                      |
| <b>HEALTHCARE ORGANIZATION<br/>(Infrastructure/Resources)</b>                                         | <b>1. Dedicated pill boxes/covers:</b> Provision of different medications in separate boxes/covers in the healthcare facility has helped as the patient to remember which medication to take at what time                                               | <b>Krishnamoorthy et al 2018, Wood et al 2015</b>                                                                         |
|                                                                                                       | <b>2. Combination drugs (polypills):</b> Polypills had the following advantages to facilitate the medication adherence: a smaller number of pills, lower frequency, less chance of forgetting, potential for lower cost, and convenient simpler regimen | <b>Salaam et al 2019, Wood et al 2015</b>                                                                                 |
|                                                                                                       | <b>3. Availability of medications:</b> Proper pharmacy inventory control and stock delivery has aided in medication adherence                                                                                                                           | <b>Miller et al 2017</b>                                                                                                  |
| <b>ENVIRONMENT<br/>(Regulatory, market and policy framework)</b>                                      | <b>1. NGO Support:</b> Patients has reported that sharing their concerns and receiving counselling from NGO/ Health officers acted as a facilitator for drug intake                                                                                     | <b>Tan et al 2017, Wood et al 2015</b>                                                                                    |

**Table 4: Thematic framework for summarizing suggestions to improve medication adherence among CVD & DM patients in India**

| Main theme/Sub-themes                                                                                         | Suggestions to improve medication adherence                                                                                                                                                                                                                                                                                                       | Studies                                                                                                                                                                                                         |
|---------------------------------------------------------------------------------------------------------------|---------------------------------------------------------------------------------------------------------------------------------------------------------------------------------------------------------------------------------------------------------------------------------------------------------------------------------------------------|-----------------------------------------------------------------------------------------------------------------------------------------------------------------------------------------------------------------|
| <b>PATIENTS</b>                                                                                               | <b>1. Peer support groups:</b> Patients can motivate each other by forming support groups among themselves                                                                                                                                                                                                                                        | <b>Krishnamoorthy et al 2018</b>                                                                                                                                                                                |
|                                                                                                               | <b>2. Digital reminder system:</b> Patient can use digital reminders such as watch, mobile phone to adhere to their drug schedule                                                                                                                                                                                                                 | <b>Krishnamoorthy et al 2018, Miller et al 2017</b>                                                                                                                                                             |
| <b>CARE TEAM<br/>(Frontline care providers -<br/>Healthcare professionals,<br/>family members and others)</b> | <b>1. Social support:</b> Family members can be educated and asked to provide support by reinforcing compliance, reminding about drug intake, motivating them patients to avoid substance abuse                                                                                                                                                   | <b>Agarwal et al 2019, Dhar et al 2016, Krishnamoorthy et al 2018, Nimesh et al 2019, Wood et al 2015</b>                                                                                                       |
|                                                                                                               | <b>2. Financial support:</b> Family members can provide financial support to cover the cost of medications, travel etc.                                                                                                                                                                                                                           | <b>Gupta et al 2019</b>                                                                                                                                                                                         |
|                                                                                                               | <b>3. Regular training of healthcare workers:</b> Physicians and other healthcare workers involved in prescribing drugs and counselling should undergo regular training on standard treatment protocols                                                                                                                                           | <b>George et al 2016, Jayanna et al 2019, Miller et al 2017, Patti et al 2020, Satish et al 2019</b>                                                                                                            |
|                                                                                                               | <b>4. Team work approach:</b> Integration of AYUSH, mental health counsellors, physiotherapist and geriatric clinics at primary healthcare level                                                                                                                                                                                                  | <b>George et al 2016, Miller et al 2017, Patti et al 2020</b>                                                                                                                                                   |
| <b>HEALTHCARE ORGANIZATION<br/>(Infrastructure/Resources)</b>                                                 | <b>1. Innovations in patient care:</b> Healthcare workers can make innovations like dedicated day for specific conditions (diabetes day, etc), dedicated counselling station/session with additional staff for detailing the importance of adherence and complications related to non-adherence, unique pill dispensing mechanism (colour coding) | <b>Agarwal et al 2019, Dhar et al 2016, Jayanna et al 2019, Krishnamoorthy et al 2018, Miller et al 2017, Newtonraj et al 2017, Patti et al 2020, Satish et al 2019, Venkatesan et al 2018, Wood et al 2015</b> |
|                                                                                                               | <b>2. IEC/BCC/Awareness campaigns:</b> Putting up of IEC materials and conducting campaigns on importance of adherence in public places and workplaces                                                                                                                                                                                            | <b>Dhar et al 2016, George et al 2016, Gupta et al 2019, Gupta et al 2020, Jayanna et al 2019, Krishnamoorthy et al 2018, Newtonraj et al 2017, Patti et al 2020, Rani et al 2019</b>                           |
|                                                                                                               | <b>3. Digitalizing patient treatment record:</b> Digitalizing a dedicated treatment record for each patient can help in better follow-up of the patient and improve adherence                                                                                                                                                                     | <b>Jayanna et al 2019, Miller et al 2017, Patti et al 2020, Satish et al 2019, Wood et al 2015</b>                                                                                                              |
|                                                                                                               | <b>4. Polypills:</b> Disseminating the advantages of polypills to healthcare professionals by CME/conferences and patients by public education campaigns; Integration of polypills into clinical practice. etc                                                                                                                                    | <b>Salaam et al 2019, Wood et al 2015</b>                                                                                                                                                                       |
| <b>ENVIRONMENT<br/>(Regulatory, market and policy framework)</b>                                              | <b>1. Linkage of health services with NGO and community-based organizations:</b> Community members, volunteers, anganwadi workers, self-help groups and NGO workers can be trained in counselling the patients to improve medication adherence                                                                                                    | <b>Dhar et al 2016, Jayanna et al 2019, Krishnamoorthy et al 2018, Kusuma et al 2010, Miller et al 2017, Tan et al 2017</b>                                                                                     |

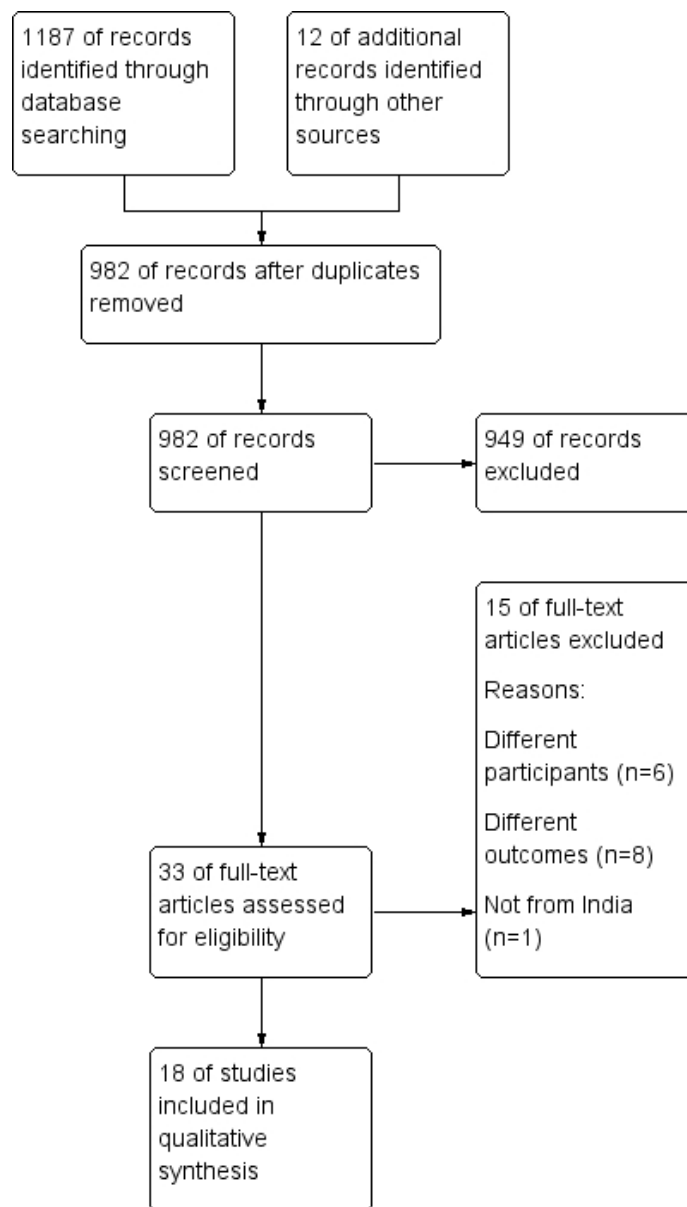

141x246mm (72 x 72 DPI)

**Supplementary Table 1 Search strategy**

| <b>Key word</b>                      | <b>Alternative word</b>                                                                                                                                                                                                                                                                                                                                                                                                                                                                                                                                                     |
|--------------------------------------|-----------------------------------------------------------------------------------------------------------------------------------------------------------------------------------------------------------------------------------------------------------------------------------------------------------------------------------------------------------------------------------------------------------------------------------------------------------------------------------------------------------------------------------------------------------------------------|
| Qualitative studies                  | ((((((((Qualitative Research[MeSH Terms]) OR Focus Groups[MeSH Terms]) OR Anthropology, Cultural[MeSH Terms]) OR Ethnopsychology[MeSH Terms]) OR Grounded Theory[MeSH Terms]) OR Nursing Methodology Research[MeSH Terms]) OR Narrative Medicine[MeSH Terms]) OR Tape Recording[MeSH Terms]) OR Culture[MeSH Terms]) OR Attitude[MeSH Terms] Case studies OR Focused group discussions OR phenomenological studies OR ethnographic studies OR interviews))                                                                                                                  |
| Medication Adherence                 | ((((((((((((((((Medication Adherence[MeSH Terms]) OR Patient Compliance[MeSH Terms]) OR No-Show Patients[MeSH Terms]) OR Health Personnel[MeSH Terms]) OR drug effects [Subheading]) OR (Treatment Adherence[MeSH Terms] OR Compliance[MeSH Terms])) OR Self Medication[MeSH Terms]) OR Self Administration[MeSH Terms]) OR Patient Medication Knowledge[MeSH Terms]) OR Attitude to Health[MeSH Terms]) OR Patient Acceptance of Health Care[MeSH Terms])) OR Patient Preference[MeSH Terms]) OR Patient Acceptance of Health Care[MeSH Terms]) OR Motivation[MeSH Terms]) |
| Barriers, Facilitators and solutions | Challenges OR Challenge OR Problem OR Problems barriers OR Difficulties OR Issues OR Limitations OR Obstacles OR Facilitators OR Suggestions OR Solutions                                                                                                                                                                                                                                                                                                                                                                                                                   |
| Diabetes mellitus and CVDs           | ((((((Diabetes Mellitus[MeSH Terms]) OR Cardiovascular Diseases[MeSH Terms] OR Hypertension[MeSH Terms] OR Coronary Disease[MeSH Terms] OR Coronary Artery Disease[MeSH Terms] OR Heart Diseases[MeSH Terms] OR Cerebrovascular Diseases[MeSH Terms] OR Stroke[MeSH Terms]))                                                                                                                                                                                                                                                                                                |



|       |                                                       |
|-------|-------------------------------------------------------|
| India | (India[MeSH Terms] OR Republic of India[MeSH Terms])) |
|-------|-------------------------------------------------------|

### Search results (PubMed):

(((((Diabetes Mellitus[MeSH Terms]) OR Cardiovascular Diseases[MeSH Terms] OR Hypertension[MeSH Terms])) AND (((((((((((((((Medication Adherence[MeSH Terms]) OR Patient Compliance[MeSH Terms]) OR No-Show Patients[MeSH Terms]) OR Health Personnel[MeSH Terms]) OR drug effects [Subheading]) OR (Treatment Adherence[MeSH Terms] OR Compliance[MeSH Terms])) OR Self Medication[MeSH Terms]) OR Self Administration[MeSH Terms]) OR Patient Medication Knowledge[MeSH Terms]) OR Attitude to Health[MeSH Terms]) OR Patient Acceptance of Health Care[MeSH Terms])) OR Patient Preference[MeSH Terms]) OR Patient Acceptance of Health Care[MeSH Terms]) OR Motivation[MeSH Terms]) OR Life Change Events[MeSH Terms]) OR Trust[MeSH Terms]))) AND (((((((((((Qualitative Research[MeSH Terms]) OR Focus Groups[MeSH Terms]) OR Anthropology, Cultural[MeSH Terms]) OR Ethnopsychology[MeSH Terms]) OR Grounded Theory[MeSH Terms]) OR Nursing Methodology Research[MeSH Terms]) OR Narrative Medicine[MeSH Terms]) OR Tape Recording[MeSH Terms]) OR Culture[MeSH Terms]) OR Attitude[MeSH Terms])) AND (India[MeSH Terms] OR Republic of India[MeSH Terms])) – 199 (Filters: Years between 2010 and 2020 and English language publication)

((((((((((((((Qualitative Research[MeSH Terms]) OR Focus Groups[MeSH Terms]) OR Anthropology, Cultural[MeSH Terms]) OR Ethnopsychology[MeSH Terms]) OR Grounded Theory[MeSH Terms]) OR Nursing Methodology Research[MeSH Terms]) OR Narrative Medicine[MeSH Terms]) OR Tape Recording[MeSH Terms]) OR Culture[MeSH Terms]) OR Attitude[MeSH Terms] Case studies OR Focused group discussions OR phenomenological studies OR ethnographic studies OR interviews))) AND (((((((((((((((Medication Adherence[MeSH Terms]) OR Patient Compliance[MeSH Terms]) OR No-Show Patients[MeSH Terms]) OR Health Personnel[MeSH Terms]) OR drug effects [Subheading]) OR (Treatment Adherence[MeSH Terms] OR Compliance[MeSH Terms])) OR Self Medication[MeSH Terms]) OR Self Administration[MeSH Terms]) OR Patient Medication Knowledge[MeSH Terms]) OR Attitude to Health[MeSH Terms]) OR Patient Acceptance of Health Care[MeSH Terms])) OR Patient Preference[MeSH Terms]) OR Patient Acceptance of Health Care[MeSH Terms]) OR Motivation[MeSH Terms])) AND (Challenges OR Challenge OR Problem OR Problems barriers OR Difficulties OR Issues OR Limitations OR Obstacles OR Facilitators OR Suggestions OR Solutions)) AND ((((((Diabetes Mellitus[MeSH Terms]) OR Cardiovascular Diseases[MeSH Terms] OR Hypertension[MeSH Terms] OR Coronary Disease[MeSH Terms] OR Coronary Artery Disease[MeSH Terms] OR Heart Diseases[MeSH Terms] OR Cerebrovascular Diseases[MeSH Terms] OR Stroke[MeSH Terms]))) AND ((India[MeSH Terms] OR Republic of India[MeSH Terms])) – 31 results (Filters: Years between 2010 and 2020 and English language publication)

**Google scholar:** 635 + 22 + 6 + 12 = 675

1  
2  
3 **ScienceDirect:** (Diabetes Mellitus OR Cardiovascular Diseases OR Hypertension) AND  
4 (Qualitative Study OR Qualitative) AND (India) AND (Adherence) – 238 articles  
5

6 **Cochrane library:** (Diabetes Mellitus OR Cardiovascular Diseases OR Hypertension) AND  
7 (Qualitative Study OR Qualitative) AND (India) AND (Adherence) – 34 articles  
8  
9

10  
11  
12  
13  
14  
15  
16  
17  
18  
19  
20  
21  
22  
23  
24  
25  
26  
27  
28  
29  
30  
31  
32  
33  
34  
35  
36  
37  
38  
39  
40  
41  
42  
43  
44  
45  
46  
47  
48  
49  
50  
51  
52  
53  
54  
55  
56  
57  
58  
59  
60

For peer review only

## Supplementary file 2. Enhancing transparency in reporting the synthesis of qualitative research: ENTREQ Checklist (Tong, *et al.*, 2012)

| Item No.                      | Guide and Description                                                                                                                                                                                                                                                                                                                                                                          | Report Location                          |
|-------------------------------|------------------------------------------------------------------------------------------------------------------------------------------------------------------------------------------------------------------------------------------------------------------------------------------------------------------------------------------------------------------------------------------------|------------------------------------------|
| 1. Aim                        | State the research question the synthesis addresses                                                                                                                                                                                                                                                                                                                                            | P 6, 1-13                                |
| 2. Synthesis methodology      | Identify the synthesis methodology or theoretical framework which underpins the synthesis, and describe the rationale for choice of methodology (e.g. meta-ethnography, thematic synthesis, critical interpretive synthesis, grounded theory synthesis, realist synthesis, meta-aggregation, meta-study, framework synthesis)                                                                  | P9, 16-25<br>P10, 1-22                   |
| 3. Approach to searching      | Indicate whether the search was pre-planned (comprehensive search strategies to seek all available studies) or iterative (to seek all available concepts until they theoretical saturation is achieved)                                                                                                                                                                                        | P8, 1-10                                 |
| 4. Inclusion criteria         | Specify the inclusion/exclusion criteria (e.g. in terms of population, language, year limits, type of publication, study type)                                                                                                                                                                                                                                                                 | P7, 3-23                                 |
| 5. Data sources               | Describe the information sources used (e.g. electronic databases (MEDLINE, EMBASE, CINAHL, psycINFO), grey literature databases (digital thesis, policy reports), relevant organisational websites, experts, information specialists, generic web searches (Google Scholar) hand searching, reference lists) and when the searches conducted; provide the rationale for using the data sources | P8, 1-10                                 |
| 6. Electronic Search strategy | Describe the literature search (e.g. provide electronic search strategies with population terms, clinical or health topic terms, experiential or social phenomena related terms, filters for qualitative research, and search limits)                                                                                                                                                          | Supplementary file 1                     |
| 7. Study screening methods    | Describe the process of study screening and sifting (e.g. title, abstract and full text review, number of independent reviewers who screened studies)                                                                                                                                                                                                                                          | Figure 1                                 |
| 8. Study characteristics      | Present the characteristics of the included studies (e.g. year of publication, country, population, number of participants, data collection, methodology, analysis, research questions)                                                                                                                                                                                                        | Table 1                                  |
| 9. Study selection results    | Identify the number of studies screened and provide reasons for study exclusion (e.g. for comprehensive searching, provide numbers of studies screened and reasons for exclusion indicated in a figure/flowchart; for iterative searching describe reasons for study exclusion and inclusion based on modifications to the research question and/or contribution to theory development)        | Fig 1 - PRISMA flow diagram<br>P11, 6-18 |
| 10. Rationale for appraisal   | Describe the rationale and approach used to appraise the included studies or selected findings (e.g. assessment of conduct (validity and robustness),                                                                                                                                                                                                                                          | P11, 14-18<br>Table 1                    |

|                          |                                                                                                                                                                                                                                                                                             |                              |
|--------------------------|---------------------------------------------------------------------------------------------------------------------------------------------------------------------------------------------------------------------------------------------------------------------------------------------|------------------------------|
|                          | assessment of reporting (transparency), assessment of content and utility of the findings)                                                                                                                                                                                                  |                              |
| 11. Appraisal items      | State the tools, frameworks and criteria used to appraise the studies or selected findings (e.g. Existing tools: CASP, QARI, COREQ, Mays and Pope [25]; reviewer developed tools; describe the domains assessed: research team, study design, data analysis and interpretations, reporting) | P9, 3-14<br>Table 1          |
| 12. Appraisal process    | Indicate whether the appraisal was conducted independently by more than one reviewer and if consensus was required                                                                                                                                                                          | P8, 11-17                    |
| 13. Appraisal results    | Present results of the quality assessment and indicate which articles, if any, were weighted/excluded based on the assessment and give the rationale                                                                                                                                        | P11, 14-18<br>Table 1        |
| 14. Data extraction      | Indicate which sections of the primary studies were analysed and how were the data extracted from the primary studies? (e.g. all text under the headings "results /conclusions" were extracted electronically and entered into a computer software)                                         | P8, 18-25                    |
| 15. Software             | State the computer software used, if any                                                                                                                                                                                                                                                    | None used                    |
| 16. Number of reviewers  | Identify who was involved in coding and analysis                                                                                                                                                                                                                                            | P9, 16-22                    |
| 17. Coding               | Describe the process for coding of data (e.g. line by line coding to search for concepts)                                                                                                                                                                                                   | P9, 23-35<br>P10, 1-22       |
| 18. Study comparison     | Describe how were comparisons made within and across studies (e.g. subsequent studies were coded into pre-existing concepts, and new concepts were created when deemed necessary)                                                                                                           | Table 2                      |
| 19. Derivation of themes | Explain whether the process of deriving the themes or constructs was inductive or deductive                                                                                                                                                                                                 | Inductive process<br>Table 2 |
| 20. Quotations           | Provide quotations from the primary studies to illustrate themes/constructs, and identify whether the quotations were participant quotations of the author's interpretation                                                                                                                 | Table 2                      |
| 21. Synthesis output     | Present rich, compelling and useful results that go beyond a summary of the primary studies (e.g. new interpretation, models of evidence, conceptual models, analytical framework, development of a new theory or construct)                                                                | P11-14                       |

# BMJ Open

**Patient and Provider's perspective on barriers and facilitators for medication adherence among adult patients with Cardiovascular Diseases and Diabetes Mellitus in India – A qualitative evidence synthesis**

|                                 |                                                                                                                                                                                                                      |
|---------------------------------|----------------------------------------------------------------------------------------------------------------------------------------------------------------------------------------------------------------------|
| Journal:                        | <i>BMJ Open</i>                                                                                                                                                                                                      |
| Manuscript ID                   | bmjopen-2021-055226.R3                                                                                                                                                                                               |
| Article Type:                   | Original research                                                                                                                                                                                                    |
| Date Submitted by the Author:   | 09-Feb-2022                                                                                                                                                                                                          |
| Complete List of Authors:       | Krishnamoorthy, Yuvaraj; JIPMER PSM, Rajaa, Sathish; Jawaharlal Institute of Postgraduate Medical Education, Rehman, Tanveer; PGIMER Thulasingam, Mahalakshmi ; JIPMER, Department of Preventive and Social Medicine |
| <b>Primary Subject Heading</b>: | Diabetes and endocrinology                                                                                                                                                                                           |
| Secondary Subject Heading:      | Cardiovascular medicine, Diabetes and endocrinology                                                                                                                                                                  |
| Keywords:                       | QUALITATIVE RESEARCH, PREVENTIVE MEDICINE, PRIMARY CARE, Coronary heart disease < CARDIOLOGY, DIABETES & ENDOCRINOLOGY                                                                                               |
|                                 |                                                                                                                                                                                                                      |

SCHOLARONE™  
Manuscripts



I, the Submitting Author has the right to grant and does grant on behalf of all authors of the Work (as defined in the below author licence), an exclusive licence and/or a non-exclusive licence for contributions from authors who are: i) UK Crown employees; ii) where BMJ has agreed a CC-BY licence shall apply, and/or iii) in accordance with the terms applicable for US Federal Government officers or employees acting as part of their official duties; on a worldwide, perpetual, irrevocable, royalty-free basis to BMJ Publishing Group Ltd ("BMJ") its licensees and where the relevant Journal is co-owned by BMJ to the co-owners of the Journal, to publish the Work in this journal and any other BMJ products and to exploit all rights, as set out in our [licence](#).

The Submitting Author accepts and understands that any supply made under these terms is made by BMJ to the Submitting Author unless you are acting as an employee on behalf of your employer or a postgraduate student of an affiliated institution which is paying any applicable article publishing charge ("APC") for Open Access articles. Where the Submitting Author wishes to make the Work available on an Open Access basis (and intends to pay the relevant APC), the terms of reuse of such Open Access shall be governed by a Creative Commons licence – details of these licences and which [Creative Commons](#) licence will apply to this Work are set out in our licence referred to above.

Other than as permitted in any relevant BMJ Author's Self Archiving Policies, I confirm this Work has not been accepted for publication elsewhere, is not being considered for publication elsewhere and does not duplicate material already published. I confirm all authors consent to publication of this Work and authorise the granting of this licence.

1  
2  
3 1 **Patient and provider's perspective on barriers and facilitators for medication adherence**  
4  
5 2 **among adult patients with cardiovascular diseases and diabetes mellitus in India – A**  
6  
7 3 **qualitative evidence synthesis**

8  
9  
10 4 **Running head:** Barriers and facilitators for medication adherence among cardiovascular  
11  
12 5 diseases and diabetes mellitus and DM patients in India

13  
14 6 **Article category:** Systematic Review

15  
16  
17 7 **Yuvaraj Krishnamoorthy<sup>1</sup>, Sathish Rajaa<sup>2</sup>, Tanveer Rehman<sup>3</sup>, Mahalakshmi**  
18  
19 8 **Thulasingham<sup>4</sup>**

20  
21 9 <sup>1</sup>Assistant Professor, Department of Community Medicine, ESIC Medical College & PGIMSR,  
22  
23 10 K.K. Nagar, Chennai, India;

24  
25 11 **Contact Number:** +91 9551892665

26  
27 12 **Email id:** [yuvi.1130@gmail.com](mailto:yuvi.1130@gmail.com)

28  
29 13 <sup>2</sup>Assistant Professor, Department of Community Medicine, ESIC Medical College & PGIMSR,  
30  
31 14 K.K. Nagar, Chennai, India;

32  
33 15 **Contact Number:** +91 9791974633

34  
35 16 **Email id:** [psrajaa2410@gmail.com](mailto:psrajaa2410@gmail.com)

36  
37 17 <sup>3</sup>Independent Author, Kolkata, West Bengal, India

38  
39 18 **Contact Number:** +91 8336922482

40  
41 19 **Email id:** [drtanveerrehman@gmail.com](mailto:drtanveerrehman@gmail.com)

42  
43 20 <sup>4</sup>Associate Professor, Department of Preventive and Social Medicine, Jawaharlal Institute of of  
44  
45 21 Postgraduate Medical Education and Research (JIPMER), Puducherry - 605006, India;

46  
47 22 **Contact Number:** +91 9488729774

48  
49 23 **Email id:** [mahalakshmi.dr@gmail.com](mailto:mahalakshmi.dr@gmail.com)

50  
51 24 **Corresponding Author:**

52  
53 25 Dr Sathish Rajaa,

1  
2  
3 1 Assistant Professor,  
4  
5 2 Department of Community Medicine,  
6  
7 3 ESIC Medical College & PGIMSR, K.K. Nagar, Chennai, India

8  
9  
10 4 **Contact Number:** +91 9791974633

11  
12 5 **Email id:** psrajaa2410@gmail.com

13  
14 6 **Abstract:**

15  
16  
17 7 **Objective:**

18  
19 8 To explore the various stakeholders' perspectives on barriers and facilitators for medication  
20  
21 9 adherence among cardiovascular diseases and diabetes mellitus patients in India.

22  
23  
24 10 **Design:** Systematic review of qualitative studies

25  
26 11 **Data sources:**

27  
28 12 A comprehensive systematic search was conducted in Medline, Cochrane Library, Science  
29  
30 13 Direct and Google Scholar from January 2010 to July 2020. We included all qualitative peer-  
31  
32 14 reviewed studies, reporting barriers and facilitators of medication adherence, from India for  
33  
34 15 our current review.

35  
36  
37 16 **Data extraction and synthesis:** Data extraction was performed by two independent authors  
38  
39 17 who also assessed the quality of included studies using the Critical Appraisal Skills Programme  
40  
41 18 (CASP) criteria. This qualitative evidence synthesis adhered to the Enhancing transparency in  
42  
43 19 reporting the synthesis of qualitative research (ENTREQ) checklist

44  
45  
46 20 **Results:**

47  
48  
49 21 In total, 18 studies were included. Major barriers reported were lack of understanding about  
50  
51 22 the disease, complications related to non-adherence, followed by forgetfulness, lack of family  
52  
53 23 support and risk communication. Health system-related barriers such as accessibility,  
54  
55 24 affordability, and acceptability were also reported by majority of the studies. Creation of peer  
56  
57 25 support groups, digital reminder systems, integration of native Indian systems of India,  
58  
59  
60



1 physiotherapy and geriatric clinics at the primary healthcare level and innovations in patient  
2 care were suggested to counter these barriers in medication adherence.

3 **Conclusion:**

4 Such patient-specific targeted interventions need to be developed to achieve better control  
5 among CVD and DM patients.

6 **Keywords:** Cardiovascular Diseases, Diabetes Mellitus, Medication Adherence, Qualitative  
7 Research

8 **Strengths and Limitations:**

- 9 1. This is the first review exploring factors associated with drug adherence among  
10 cardiovascular diseases and diabetes mellitus patients in India
- 11 2. We have adhered to the ENTREQ statement ensuring transparency and reproducibility  
12 of the study findings.
- 13 3. We cannot rule out dissemination bias, causing selective reporting of studies with more  
14 non adherence to medications
- 15 4. We focussed primarily on the patient and provider perspective on medication  
16 adherence. Hence, we cannot comment on the organizational or political influences on  
17 the adherence to long-term therapies.
- 18 5. The sample size of the included studies can be considered relatively low (median  
19 sample size - 30).

## 1 INTRODUCTION

2 Cardiovascular diseases (CVDs) are the leading cause of mortality globally and in India.<sup>1,2</sup>  
3 More than a quarter (28%) of all-cause mortality in India is attributed to CVDs, where ischemic  
4 heart disease (IHD) and stroke constitute the majority (83%).<sup>3</sup> On the other hand, India ranks  
5 second after China in the global diabetes epidemic, with a prevalence of around 10%.<sup>4</sup> Both  
6 diabetes mellitus (DM) and hypertension have long been recognized as independent risk factors  
7 for CVDs, whereas adherence to prescribed hypoglycaemic and antihypertensive drug  
8 therapies have significantly reduced the risk.<sup>5-8</sup> At least half of these chronic disease patients  
9 stop taking medications within a year, often without informing their provider. With further  
10 nonadherence and attrition over time, medication adherence has emerged as a significant public  
11 health priority.<sup>9</sup>

12 Medication adherence is defined as the extent to which a person's behaviour coincides with the  
13 agreed medication regimen or health advice from a health care provider.<sup>10</sup> It has three  
14 components: initiation (when the patient takes the first dose of prescribed medication),  
15 implementation (the extent to which a patient's actual dosing corresponds to the prescribed  
16 dosing regimen), and discontinuation (when no more doses are taken after that).<sup>11</sup> Medication  
17 adherence is of growing interest to clinicians, healthcare systems, and other stakeholders. There  
18 is soaring evidence that links nonadherence with lower quality of life, adverse clinical events,  
19 increased need for medical interventions, and mortality, thus giving rise to avoidable out-of-  
20 pocket expenditure in health.<sup>12</sup> Non-adherent hypertensive and stable coronary heart disease  
21 (CHD) patients have a four to five times higher risk of developing CHD and death, when  
22 compared to adherent patients.<sup>13,14</sup> Similarly, the likelihood of hospitalization is doubled  
23 among DM & hypertensive patients who are non-adherent to prescribed therapies compared to  
24 the general population. Despite recent advancements in pharmacologic treatment and  
25 technology to treat and monitor DM and CVD patients, medication adherence is of particular

1 concern in low-and-middle-income countries (LMIC) like India, where accessibility and  
2 affordability issues are still pertinent.<sup>3,15</sup>

3 Barriers to adherence are often related to patient, medication, provider, and health system  
4 factors, with interactions between them.<sup>16,17</sup> Patient factors that influence adherence include  
5 poor health literacy, faulty cultural beliefs regarding medication effectiveness, and religious  
6 healing practices.<sup>17</sup> Low income, forgetting to take medication, and perceptions regarding pills  
7 like safety concerns, convenience, and necessity add to the above list. Inadequate knowledge  
8 about a drug and its use, not being convinced of the need for medication, fear of adverse effects,  
9 and long-term treatment regimens also prompt medication discontinuation.<sup>15</sup> Clinician factors  
10 includes: failure to recognize nonadherence, prescription of complex and multidrug regimens,  
11 ineffective communication of benefits of medications, and excluding patients in the treatment  
12 decision-making process.<sup>17</sup> Health system factors comprise limited insurance coverage, poor  
13 coordination of care between inpatient and outpatient settings, and inadequate communication  
14 between prescribers (i.e., specialists and primary care clinicians). In addition, the caregivers'  
15 aspects also become relevant in determining patients' adherence, as it is proven that CVD  
16 patients with caregivers are more likely to be adherent to medications.<sup>18</sup> Hence identifying  
17 patient-specific barriers and adopting suitable techniques to overcome them is imperative to  
18 improve medication adherence. A few successful facilitators that has helped us overcoming  
19 these barriers include: inclusion of medication counsellors into the continuum of care to guide  
20 patients, single-pill fixed-dose combinations, training pharmacists as coaches for drug  
21 therapies, building peer groups for chronic conditions, and developing information systems in  
22 the follow-up of patients.<sup>19</sup>

23 Quantitative studies have extensively studied medication adherence and its determinants. They  
24 do not, however, uncover life circumstances that may influence adherence from the patient  
25 perspective. A systematic review of qualitative studies will provide us with a better

1 understanding of the barriers and facilitators from the first-hand experiences of patients,  
2 healthcare providers, and caregivers.<sup>20</sup> Qualitative evidence synthesis, a novel research  
3 method, brings together the available qualitative evidence from primary studies through a  
4 systematic review process. Despite the conceptually rich evidence generated from primary  
5 qualitative studies, a qualitative evidence synthesis can aid policymakers and clinicians to get  
6 an overall insight of the findings, thereby enabling them to address all subtle and sensitive  
7 issues that most primary studies encounter. The findings from this qualitative evidence  
8 synthesis can guide various stakeholders to frame specific policy recommendations in non-  
9 communicable disease care.<sup>21</sup> Thus, we undertook this review to understand the perspective  
10 of various stakeholders (patients, caregivers, and healthcare providers) on the barriers and  
11 facilitators for medication adherence among CVD and DM patients in India. We also explored  
12 the suggestions and solutions provided by these stakeholders in overcoming the reported  
13 barriers.

## 14 **METHODS**

15 This review was performed by adhering to the “Enhancing transparency in reporting the  
16 synthesis of qualitative research (ENTREQ)” statement. (Supplementary file 1)<sup>22</sup> We  
17 registered our protocol in the PROSPERO database (Registration number -  
18 CRD42020199529). We also searched PROSPERO and Cochrane to ensure that no similar  
19 review protocol has been reported. We also performed a preliminary search to ensure that no  
20 previous reviews of our similar topic targeting the Indian population were published.

### 21 **Study design**

22 We performed a qualitative evidence synthesis of all available qualitative studies on the barriers  
23 and facilitating factors for medication adherence among CVD and DM patients in India. This

1 review would help to aggregate the evidence of peer-reviewed articles and build an organized  
2 empirical research outline based on prior knowledge.

### 3 ***Eligibility criteria***

#### 4 *Study type*

5 We have included peer-reviewed qualitative studies conducted in India for our current review.  
6 Furthermore, qualitative evidence from other mixed methods studies was screened for  
7 eligibility and included in the qualitative component was relevant to our review. In addition,  
8 we included studies using qualitative techniques for data collection such as focussed group  
9 discussion (FGD), in-depth interviews (IDI), and Key Informant Interviews (KII).

#### 10 *Participant type*

11 We have included the studies reporting the barriers and facilitators of medication adherence  
12 from patients' perspectives (CVD and DM), family members, healthcare workers (HCWs), or  
13 health system policymakers perspectives. HCWs were defined as per World health organisation  
14 (WHO) recommendation as "all the persons involved in the actions whose primary intent is to  
15 enhance the health."<sup>23</sup>

#### 16 *Outcome*

17 The phenomenon of interest was to explore the barriers and facilitators for medication  
18 adherence among CVD and DM patients in India. We also explored the possible suggestions  
19 and solutions to address the barriers and improve compliance, as experienced by the patients,  
20 caregivers, family members, HCWs, and other relevant stakeholders.

#### 21 ***Exclusion criteria***

22 We have excluded the studies not available in English, books, conference abstracts, grey  
23 literature, or editorial comments. We have also excluded the studies reporting only quantitative  
24 data such as cross-sectional surveys, case-control, cohort studies, or intervention trials.

#### 25 **Search strategy**

1  
2  
3 1 We have conducted a comprehensive and systematic search in databases and search engines  
4  
5 2 such as Medline, Cochrane Library, ScienceDirect, and Google Scholar. A combination of  
6  
7 3 medical subject heading (MeSH) and free-full text terms was used for carrying out a literature  
8  
9 4 search. The detailed search strategy and search results in the databases mentioned above and  
10  
11 5 search engines are provided in Supplementary File 2. In addition to this, we also checked the  
12  
13 6 reference list of primary studies obtained via electronic search and included articles relevant to  
14  
15 7 our review and analysis. The search was conducted in all above-mentioned databases from  
16  
17 8 January 2010 to July 2020. Our search timeline was restricted to the past decade alone to ensure  
18  
19 9 the identification of emerging issues.  
20  
21  
22

### 23 24 10 **Study selection process**

25  
26 11 Two investigators (YK and TR) independently performed the literature search, screened the  
27  
28 12 title and abstract of all the identified studies, and retrieved the full text for articles relevant to  
29  
30 13 our review. Further full-text screening of the retrieved articles was done again independently  
31  
32 14 by the two investigators (YK, TR) to select the studies matching the eligibility criteria of our  
33  
34 15 review. Disagreements during this process between the two investigators were resolved  
35  
36 16 through consultation with a third investigator (SR).  
37  
38  
39

### 40 17 **Data Extraction and Management**

41  
42 18 After the study selection, two investigators (YK and TR) independently extracted the relevant  
43  
44 19 data and study characteristics onto a predetermined data extraction format. Data entry was  
45  
46 20 double-checked for accuracy by a third investigator (SR) by comparing the data presented in  
47  
48 21 the review and individual study reports. As a result, we have extracted the following study  
49  
50 22 characteristics: general information such as the name of the first author, the country in which  
51  
52 23 the study was done, and year of publication, in the methods section, data collection period,  
53  
54 24 study design, study participants, sample size, sampling technique, and data collection  
55  
56  
57  
58  
59  
60

1 procedure. In addition, barriers, facilitators, suggestions, and solutions to medication adherence  
2 were identified systematically.

### 3 **Quality assessment**

4 Two investigators (YK and SR) independently performed the quality check using the Critical  
5 Appraisal Skills Programme (CASP) criteria.<sup>24</sup> This checklist has been widely used for  
6 assessing the quality of studies included in Qualitative Evidence synthesis.<sup>25</sup> This checklist  
7 helps us to determine the coherence of included studies with the quality appraisal standard for  
8 qualitative studies. This checklist consists of 10 questions concerning the study's clarity,  
9 methodology, and results to rank the included studies. Subsequently, these studies were  
10 stratified into high quality (three stars for studies scoring 8 to 10 points), medium quality (two  
11 stars for studies scoring 4 to 7 points), and low rate (one star for studies scoring 0 to 3 points).  
12 We did not exclude the low-quality studies, but the interpretation of results was made with  
13 caution. Disagreements during the quality assessment process were resolved by discussion with  
14 the third investigator (TR).

### 15 **Data Analysis**

16 We analysed and reported the findings in separate clusters such as patients, caregivers, family  
17 members, HCWs, and policymakers to demonstrate the differences among these subgroups.  
18 We have adopted a thematic framework analysis to analyse and synthesize the data. Thematic  
19 framework analysis has been helpful as the evidence was primarily descriptive and improved  
20 our understanding of the barriers and facilitators in medication adherence among CVD and DM  
21 patients. This framework synthesis has five stages of synthesizing the qualitative data.

22 ***First stage - Familiarisation with the data:*** Primary investigator (YK) did the process of  
23 familiarisation with data by reviewing all the selected articles against the objective of our  
24 review and found the recurrent themes across the included studies.

1  
2  
3 1 **The second stage - Identifying the thematic framework:** The investigators used a  
4  
5 2 predetermined thematic framework developed using literature to guide the thematic analysis.  
6  
7 3 The final framework comprised of a detailed list of facilitators and barriers for medication  
8  
9 4 adherence and also solutions to address the issue.

10  
11  
12 5 **Third stage - Indexing:** Two independent investigators (YK and SR) read the extracted  
13  
14 6 information and searched for themes as per the predetermined thematic framework and found  
15  
16 7 additional emerging themes. The framework underwent several revisions as and when a new  
17  
18 8 theme emerged, after discussing with the entire team of investigators. Next, all the studies were  
19  
20 9 completely read and examined till there was no new emergent theme. Coding of the data was  
21  
22 10 then done as per the themes identified in our analysis. Finally, each preliminary study indexing  
23  
24 11 was done using the codes related to the thematic framework. Whenever appropriate, sections  
25  
26 12 of the studies were indexed with one or more codes.

27  
28  
29  
30 13 **Fourth stage - Charting:** The investigators then sorted the data based on themes and presented  
31  
32 14 these themes in the tabular format (chart). The rows and columns of the table indicate the  
33  
34 15 themes related to the studies, which enabled us to compare the study findings across various  
35  
36 16 themes and subthemes.

37  
38  
39  
40 17 **Fifth stage - Mapping and interpretation:** The investigators then used these charts to define  
41  
42 18 the concepts identified, and finally mapped the nature and range of the phenomena. Our review  
43  
44 19 explored the associations between the various emerging themes and helped in clarifying the  
45  
46 20 findings. Finally, we mapped and interpreted the findings in line with our objectives and  
47  
48 21 emergent themes.

## 22 **Ethics Approval:**

23 Approval from an ethics committee is not required since our review included only publicly  
24 available data without involving the human participants directly.



## 1 **Patient and Public Involvement:**

2 Patients or the public were not involved in the design, or conduct, or reporting, or dissemination  
3 plans of our research.

## 4 **Results**

### 5 **Study selection**

6 A comprehensive and systematic search was done to identify the relevant studies from January  
7 2010 to July 2020. In total, we identified 1187 citations, and after the removal of duplicates  
8 from multiple databases, 982 records were screened for their title and abstract, and assessed for  
9 eligibility. From these records, we retrieved 33 articles, and after going through the full text of  
10 these articles, 18 studies were included in the review. (**Figure 1**).<sup>26-43</sup>

### 11 **Characteristics of the studies included**

12 Characteristics of the included studies are reported in **Table 1**. Of the 18 studies included, 9  
13 (50%) were from the southern region, followed by 7 (38%) from the northern part of India. The  
14 mean age of the participants ranged from 25-76 years. The typology of the studies comprised  
15 of in-depth interviews (IDIs) and focussed group discussions (FGDs). The study participants  
16 were primarily patients with diabetes, hypertension, or any cardiovascular diseases (to explore  
17 the patient perspective), and health care workers (4 studies) providing care to them (to obtain  
18 the provider perspective). The total sample size of the included studies ranged from 6 to 100.  
19 The majority (10 of the included studies) were from the community, while the rest were either  
20 facility-based or had participants from ongoing trials. Four of the included studies used  
21 software for analysing the qualitative data, while the rest followed manual methods. Most of  
22 the included studies (14 out of 18) had high-quality evidence.

### 23 **Narrative synthesis**

1 Findings from our review showed that significant factors contributing to adherence were  
2  
3 grouped under three themes: patient-related, family-related, and health system-related factors.  
4  
5 The barriers, facilitators, and suggestions to improve medication adherence were summarized  
6  
7 under these three themes.  
8  
9

## 10 **Barriers in medication adherence**

11 **Table-2** shows the thematic framework analysis related to barriers in medication adherence  
12 among CVD and DM patients. All the 18 included studies have explored and reported on these  
13  
14 barriers.  
15

### 16 *Patient-related factors*

17 Significant patient-related barriers (10 studies) reported were lack of knowledge or  
18 understanding about the disease, its complications, and the treatment schedule, followed by  
19 forgetfulness to take medicines (7 studies). Reasons provided for the same were the patients'  
20 busy schedule, laziness, or forgetting to take the medication while travelling out-of-station.  
21 Patients have also reported certain misconceptions about the medicines like the risk of long-  
22 term neurological illness because of medication intake, inferior quality of drugs provided in  
23 hospitals, and wrong perception about stopping the medications once the patient feels normal.  
24 Patients in some studies have reported that they practice alternate systems of medicine such as  
25 herbal medicines and avoid taking allopathic medicines leading to poorer control. Substance  
26 use such as alcohol or tobacco use, side effects related to drugs, stress, and stigma were reported  
27 to be other barriers  
28

### 29 *Family-related factors*

30 The patients and providers have reported lack of family support as a significant contributing  
31 factor for nonadherence. In addition, the lack of social and emotional support to the patients  
32 further promote nonadherence. Domestic works, personal priorities, commitments, or other  
33 family-related issues hinder the family members from adequate support.  
34  
35  
36  
37  
38  
39  
40  
41  
42  
43  
44  
45  
46  
47  
48  
49  
50  
51  
52  
53  
54  
55  
56  
57  
58  
59  
60

### 1 *Health system-related factors*

2 In most of these studies, providers were also interviewed to understand the health system  
3 barriers responsible for nonadherence among CVD and DM patients. Healthcare providers and  
4 stakeholders interviewed, in almost all these studies, have reported affordability, accessibility,  
5 and acceptability as major factors hindering medication adherence. Affordability is of prime  
6 concern among patients seeking healthcare from private facilities. Though there are no direct  
7 medical costs involved in availing services from the public sector or primary healthcare centres,  
8 direct non-medical costs such as transport (due to poor accessibility) and indirect costs such as  
9 loss of wages (due to inconvenient consultation timing) were contributory. In addition, studies  
10 reported that patients, in general, had wrong perceptions about the quality of medications  
11 provided in public facilities, influencing them to choose private health facilities, including  
12 those belonging to lower socioeconomic status. Lack of risk communication, counselling, or  
13 empathy by the physicians mainly due to overburdened public health facilities and time  
14 constraints were the other health system-related barriers reported by the providers and patients.

### 15 **Facilitators in medication adherence**

16 Facilitators in medication adherence were also summarized using the pre-existing thematic  
17 framework (**Table-3**). In total, ten studies have explored the facilitators in medication  
18 adherence from the patient or providers' perspective.

### 19 *Patient-related factors*

20 Most of the studies (5 studies) reported fear of complications due to nonadherence and self-  
21 perception of being healthy (once they adhere to the medications) as the significant facilitators.  
22 In addition, having a reminder system in the form of reminder notebooks, separate  
23 pillboxes/cases/covers, or personalized shelf facilitates the patients in adhering to the  
24 medications. Some studies have also reported that integrating drug intake into daily routine  
25 activities and peer influence acts as good facilitators for compliance with medications.

1  
2  
3 1 *Family-related factors*  
4

5 2 Family support was reported as a major facilitating factor for compliance with medication.  
6

7 3 Apart from the support, adverse experiences in the past, such as death or severe complications  
8  
9 4 among the family members, instilled fear in the patients and making them more compliant to  
10  
11 5 the medications.  
12  
13

14 6 *Health system-related factors*  
15

16 7 Barriers reported in some of the studies, such as empathy and counselling by healthcare  
17  
18 8 providers, were considered facilitators by other studies' patients. Another major facilitator from  
19  
20 9 the health system side is the trust that patient has in their physician and their willingness to  
21  
22 10 effectively follow advices related to self-care and adherence. Other familiar facilitators  
23  
24 11 reported by the patients and providers were the use of dedicated pill cover/boxes for each drug  
25  
26 12 provided in the clinic, linkage of health services with other non-governmental organisations  
27  
28 13 (NGO) for provision of counselling and generating awareness, availability of medication, and  
29  
30 14 use of polypills.  
31  
32  
33  
34

35 15 **Suggestions to improve medication adherence**  
36

37 16 Suggestions and solutions to enhance the compliance to medication were reported in 16 out of  
38  
39 17 the 18 included studies based on either patient or provider's perspective (**Table-4**). Few  
40  
41 18 suggestions were related to patients and family members, while the majority were related to  
42  
43 19 the change in the health system.  
44  
45

46 20 *Patient and family-related factors*  
47

48 21 Creating or joining a peer support group was one among the major suggestions related to the  
49  
50 22 patients. Digital reminder systems using a watch or a mobile phone were other uncommon  
51  
52 23 suggestions to improve medication adherence.  
53  
54

55 24 *Health system-related factors*  
56  
57  
58  
59  
60

1  
2  
3 1 Innovations in patient care, have been necessitated as an important factor to promote drug  
4  
5 2 adherence. Some possible recommendations were hosting dedicated days for specific disease  
6  
7 3 conditions to avoid overburdening the facilities, a dedicated counselling station for drug  
8  
9 4 adherence during the clinic with separate human resources, and a unique pill dispensing  
10  
11 5 mechanism like colour coding, etc were the other suggestions. In addition, information  
12  
13 6 education and communication (IEC)/ behaviour change communication (BCC) campaigns,  
14  
15 7 digitalizing the patient treatment records, linkage of healthcare services with NGOs or  
16  
17 8 community-based organizations, regular training of healthcare workers, and promotion of  
18  
19 9 polypill use were other common suggestions offered by the healthcare providers.  
20  
21  
22

## 23 24 **Discussion**

25  
26 11 We conducted this review to integrate qualitative evidence on barriers and facilitators for  
27  
28 12 medication adherence among CVD and DM patients in India. We also further explored the  
29  
30 13 suggestions to improve medication adherence. The studies included in our review involved a  
31  
32 14 total of 636 participants (534 CVD and DM patients, 102 healthcare providers). The majority  
33  
34 15 of the included studies were of high quality concerning study clarity, methodology, and results.  
35  
36 16 We summarized the three major themes: barriers, facilitators, suggestions and reported our  
37  
38 17 findings under the following four sub-themes: patients, care team, healthcare organization, and  
39  
40 18 environment-related factors.  
41  
42  
43

### 44 *Comparison of findings with previous literature*

#### 45 *Barriers in medication adherence*

46  
47 21 Major barriers were lack of patient's understanding about the disease and its complications,  
48  
49 22 forgetfulness, and misconception about the medications. Lack of family support was seen as a  
50  
51 23 major barrier from both patients' and providers' perspectives. In addition to these factors, stress  
52  
53 24 and stigma were other contributory barriers. In addition to the above, adherence to medications  
54  
55 25 was decided by patients' cultural beliefs, perceived discrimination, and social customs, which  
56  
57  
58  
59  
60

1 are largely prevalent in a culturally influenced country like India. A few studies have also  
2 shown evidence of improvement in medication adherence in settings, where efforts were taken  
3 to overcome the cultural barriers.<sup>44</sup> We also found that the major health system-related barriers  
4 were lack of accessibility and availability, higher cost of medications, and poor physician  
5 attitude. These findings were in line with the previous review conducted among South-East  
6 Asian DM patients.<sup>44-46</sup> In addition, our findings of patients related factors were found to be  
7 similar to other patients belonging to non-English speaking Hispanic and south American  
8 ethnic groups, such as lack of understanding about their condition, along with additional stress  
9 and stigma.<sup>47-49</sup>

#### 10 *Facilitators in medication adherence*

11 Fear of complications, self-perception of being healthy, having a reminder system were  
12 reported as major facilitators by patients. Physician trust, advice, empathy, and counselling  
13 were the common provider-related facilitators facilitating adherence. Common facilitators as  
14 reported by the patients and providers were: dedicated pill cover/boxes for each drug provided  
15 in the clinic, availability of medication, and use of polypills. These findings were also in line  
16 with the previous qualitative reviews conducted in low middle-income countries including  
17 India.<sup>47-50</sup>

#### 18 *Suggestions to improve medication adherence*

19 The solutions provided by the patients and health professionals were in line with the barriers  
20 identified in our review. Comprehensive physician counselling to make the patients understand  
21 their own condition, complications of the disease and avoid misconception about the drugs and  
22 their side effects, along with good family support, and making the medication accessible and  
23 available free of cost were suggested as major suggestions to improve medication adherence.  
24 Similar interventions were also suggested by previous qualitative evidence on medication  
25 adherence among CVD and DM patients.<sup>45-49</sup> It is also interesting to note that medication

1 adherence was also hurdled by the patients' intention towards adherence, and this intention  
2 might vary across nations and cultural groups. The patient's intention not to refill prescriptions  
3 due to cost, not to take medication because he feels better, also influences the patient's decision.  
4 Thus future research exploring these reasons on patient's choice to adhere or not, rather than  
5 an inability to adhere (e.g., forgetting, no access) needs to be encouraged.

### 6 *Strengths and limitations of the study*

7 To the best of our knowledge, this is the first review synthesizing all possible qualitative factors  
8 associated with medication adherence among CVD and DM patients in India. We have  
9 provided comprehensive and systematic evidence on the barriers, facilitators related to  
10 medication adherence, adhering to the ENTREQ statement, thereby ensuring transparency and  
11 reproducibility. We examined this evidence through the lenses of a well-established theoretical  
12 framework model. Furthermore, our study was able to provide valuable suggestions to promote  
13 medication adherence from both patient's and provider's perspectives. In addition to these  
14 strengths, we found that the majority of the studies included in our review were of high quality  
15 evidence. This in turn ensures the transferability (external validity) of our review findings.  
16 However, our review has certain limitations. We did not search grey literature, possibly missing  
17 some insights for our review. Hence, we cannot rule out the dissemination bias for an accurate  
18 and complete representation of medication adherence. We focussed primarily on the patient  
19 and provider perspective on medication adherence.<sup>51</sup> Hence, we cannot comment on the  
20 organizational or political influences on the adherence to long-term therapies as mentioned in  
21 the WHO report.<sup>16</sup> The sample size of the included studies can be considered relatively low  
22 (median sample size - 30). However, all the studies were conducted till the achievement of data  
23 saturation. In addition to the above, these results and suggestions need to be considered after  
24 taking into account India's cross-cultural adaptations, customs, linguistic variations, and  
25 genetic susceptibility, and higher prevalence of risk factor profile.

### 1 *Implications for clinical and public health practice*

2  
3  
4  
5  
6  
7  
8  
9  
10  
11  
12  
13  
14  
15  
16  
17  
18  
19  
20  
21  
22  
23  
24  
25  
26  
27  
28  
29  
30  
31  
32  
33  
34  
35  
36  
37  
38  
39  
40  
41  
42  
43  
44  
45  
46  
47  
48  
49  
50  
51  
52  
53  
54  
55  
56  
57  
58  
59  
60

1 Improving medication adherence is essential to achieve better control and prevent life-threatening complications. Factors related to patients such as self-awareness and fear about the condition and its complications acted as a major facilitator for medication adherence. We also observed that most of the barriers identified were modifiable, in nature. Interventions should focus on these modifiable barriers such as knowledge barriers, intention barriers, and health system-related barriers to achieve better adherence. In addition, the family members need to help the patients in mapping their daily routine and link the medicine intake with these routines to facilitate adherence. Our review also suggested that healthcare providers play an important role in promoting medication adherence. Hence, the interventions should not only target the patients but also the family members and healthcare providers and they should be tailored to suit differences in setting, culture, and type of the patients.

### 13 *Implications for future research*

14 More evidence needs to be generated concerning the effectiveness and feasibility of possible solutions obtained in our review including the digital solutions, polypills, peer support groups, etc. Further qualitative studies including the subgroup of patients with CVD and DM under different stages and treatment regimens are required to contextualize the medication adherence on a larger scale. Exploring the barriers using a theoretical framework with the same methodological approach, can provide more reliable evidence to develop patient-centred interventions and achieve better control among CVD and DM patients.

### 21 **Conclusion:**

22 In our review, we categorised the facilitating factors and barriers influencing medication adherence into patient-related, health system-related, and care team-related factors. Thus, we advocate the creation of peer support groups, use of a digital reminder system for overcoming patients related factors, and integration of Indian systems of medicine, physiotherapy, and



1 geriatric clinics even at the primary healthcare level for overcoming the health system-related  
2 barriers towards medication adherence.

3  
4  
5  
6  
7  
8  
9  
10  
11  
12  
13  
14  
15  
16  
17  
18  
19  
20  
21  
22  
23  
24  
25  
26  
27  
28  
29  
30  
31  
32  
33  
34  
35  
36  
37  
38  
39  
40  
41  
42  
43  
44  
45  
46  
47  
48  
49  
50  
51  
52  
53  
54  
55  
56  
57  
58  
59  
60

4 **Funding:** None

5 **Competing interests statement:** None declared

6 **Acknowledgements:** None

7 **Author contribution statement:** Conceived and designed the study: YK & SR, Data  
8 management and extraction: YK, SR & TR, Analysed the data and wrote the paper: SR, YK  
9 & TR. Provided comments and inputs to revise the manuscript: SR, YK, TR & MT

10 **Data sharing statement:** The authors confirm that the data supporting the findings of this  
11 study are available within the article

12 **References:**

- 13 1. Walker IF, Garbe F, Wright J, Newell I, Athiraman N, Khan N, et al. The Economic  
14 Costs of Cardiovascular Disease, Diabetes Mellitus, and Associated Complications in  
15 South Asia: A Systematic Review. *Value Health Reg Issues*. 2018;15:12–26.
- 16 2. Glovaci D, Fan W, Wong ND. Epidemiology of Diabetes Mellitus and Cardiovascular  
17 Disease. *Curr Cardiol Rep*. 2019;21:21.
- 18 3. Prabhakaran D, Jeemon P, Sharma M, Roth GA, Johnson C, Harikrishnan S, et al. The  
19 changing patterns of cardiovascular diseases and their risk factors in the states of India:  
20 the Global Burden of Disease Study 1990–2016. *Lancet Glob Health*. 2018;6:e1339–  
21 51.
- 22 4. Tandon N, Anjana RM, Mohan V, Kaur T, Afshin A, Ong K, et al. The increasing  
23 burden of diabetes and variations among the states of India: the Global Burden of  
24 Disease Study 1990–2016. *Lancet Glob Health*. 2018;6:e1352–62.

- 1 5. Durand H, Hayes P, Morrissey EC, Newell J, Casey M, Murphy AW, et al. Medication  
2 adherence among patients with apparent treatment-resistant hypertension: systematic  
3 review and meta-analysis. *J Hypertens*. 2017;35:2346–57.
- 4 6. Polypharmacy and Medication Adherence in Patients With Type 2 Diabetes | Diabetes  
5 Care [Internet]. [cited 2020 Jul 30]. Available from:  
6 <https://care.diabetesjournals.org/content/26/5/1408.short>
- 7 7. Vrijens B, Antoniou S, Burnier M, de la Sierra A, Volpe M. Current Situation of  
8 Medication Adherence in Hypertension. *Front Pharmacol* [Internet]. 2017 [cited 2020  
9 Jul 31];8. Available from:  
10 <https://www.frontiersin.org/articles/10.3389/fphar.2017.00100/full>
- 11 8. Rehman T, Rajaa S, Kumar G, Jayalakshmy R. Prevalence and factors influencing  
12 diabetes among persons with type 2 diabetes mellitus in urban Puducherry: A cross-  
13 sectional analytical study. *Indian J Community Med*. 2020 Jul;45(3):315.
- 14 9. Polonsky WH, Henry RR. Poor medication adherence in type 2 diabetes: recognizing  
15 the scope of the problem and its key contributors. *Patient Prefer Adherence*.  
16 2016;10:1299–307.
- 17 10. Leporini C, De Sarro G, Russo E. Adherence to therapy and adverse drug reactions: is  
18 there a link? *Expert Opin Drug Saf*. 2014;13 Suppl 1:S41-55.
- 19 11. Lam WY, Fresco P. Medication Adherence Measures: An Overview. *BioMed Res Int*.  
20 2015; 2015:1–12.
- 21 12. Kvarnström K, Airaksinen M, Liira H. Barriers and facilitators to medication  
22 adherence: a qualitative study with general practitioners. *BMJ Open*. 2018;8:e015332.
- 23 13. Ferdinand KC, Senatore FF, Clayton-Jeter H, Cryer DR, Lewin JC, Nasser SA, et al.  
24 Improving Medication Adherence in Cardiometabolic Disease. *J Am Coll Cardiol*.  
25 2017;69:437–51.

- 1 14. Krueger KP, Berger BA, Felkey B. Medication adherence and persistence: a  
2 comprehensive review. *Adv Ther.* 2005;22:313–56.
- 3 15. Dennis T, Meera NK, Binny K, Sekhar MS, Kishore G, Sasidharan S. Medication  
4 adherence and associated barriers in hypertension management in India. *CVD Prev*  
5 *Control.* 2011 Jan 1;6(1):9-13.
- 6 16. Miller NH, Hill M, Kottke T, Ockene IS. The multilevel compliance challenge:  
7 recommendations for a call to action. A statement for healthcare professionals.  
8 *Circulation.* 1997;95:1085–90.
- 9 17. WHO | ADHERENCE TO LONG-TERM THERAPIES: EVIDENCE FOR ACTION  
10 [Internet]. WHO. World Health Organization; [cited 2020 Jul 30]. Available from:  
11 [http://www.who.int/chp/knowledge/publications/adherence\\_report/en/](http://www.who.int/chp/knowledge/publications/adherence_report/en/)
- 12 18. Aggarwal B, Liao M, Mosca L. Medication Adherence Is Associated with Having a  
13 Caregiver Among Cardiac Patients. *Ann Behav Med Publ Soc Behav Med.*  
14 2013;46:237–42.
- 15 19. Daliri S, Bekker CL, Buurman BM, Scholte op Reimer WJM, van den Bemt BJB,  
16 Karapinar – Çarkit F. Barriers and facilitators with medication use during the transition  
17 from hospital to home: a qualitative study among patients. *BMC Health Serv Res.* 2019;  
18 19:204.
- 19 20. Rathbone AP, Todd A, Jamie K, Bonam M, Banks L, Husband AK. A systematic  
20 review and thematic synthesis of patients' experience of medicines adherence. *Res*  
21 *Social Admin Pharm.* 2017 May 1;13(3):403-39.
- 22 21. Flemming K, Booth A, Garside R, Tunçalp Ö, Noyes J. Qualitative evidence synthesis  
23 for complex interventions and guideline development: clarification of the purpose,  
24 designs and relevant methods. *BMJ Global Health.* 2019 Jan 1;4(Suppl 1):e000882.

- 1  
2  
3 1 22. Tong A, Flemming K, McInnes E, Oliver S, Craig J. Enhancing transparency in  
4 reporting the synthesis of qualitative research: ENTREQ. BMC Med Res Methodol.  
5 2  
6 reporting the synthesis of qualitative research: ENTREQ. BMC Med Res Methodol.  
7 3  
8 2012; 12:181  
9  
10 4 23. Mohanty A, Kabi A, Mohanty AP. Health problems in healthcare workers: A review. J  
11 Family Med Primary Care. 2019 Aug;8(8):2568.  
12 5  
13 24. Critical Appraisal Skills Programme (2018). CASP (Qualitative) Checklist. [online]  
14 6  
15 Available at: [https://casp-uk.net/wp-content/uploads/2018/01/CASP-Qualitative-](https://casp-uk.net/wp-content/uploads/2018/01/CASP-Qualitative-Checklist-2018.pdf)  
16 7  
17 [Checklist-2018.pdf](https://casp-uk.net/wp-content/uploads/2018/01/CASP-Qualitative-Checklist-2018.pdf) Accessed: 12 September 2020  
18 8  
19 25. Booth A, Noyes J, Flemming K, Gerhardus A, Wahlster P, van der Wilt GJ, et al.  
20 9  
21 Structured methodology review identified seven (RETREAT) criteria for selecting  
22 10  
23 qualitative evidence synthesis approaches. J Clin Epidemiol. 2018 Jul 1;99:41-52.  
24 11  
25 26. Agarwal A, Davies D, Goenka S, Prabhakaran D, Huffman MD, Mohanan PP.  
26 12  
27 Facilitators and barriers of heart failure care in Kerala, India: A qualitative analysis of  
28 13  
29 healthcare providers and administrators. Indian Heart J. 2019; 71(3):235–41.  
30 14  
31 27. Dhar L. Perceptions of global coronary heart disease risk, and adherence to  
32 15  
33 antihypertensive treatment among low income urban women in Delhi, India (Doctoral  
34 16  
35 dissertation, Curtin University).  
36 17  
37 28. George CE, Ramadas D, Norman G, Mukherjee D, Rao T. Barriers to cardiovascular  
38 18  
39 disease risk reduction: Does physicians' perspective matter? Indian Heart J. 2016;  
40 19  
41 68(3):278–85  
42 20  
43 29. Gupta S, Dhamija JP, Mohan I, Gupta R. Qualitative Study of Barriers to Adherence to  
44 21  
45 Antihypertensive Medication among Rural Women in India. Int J Hypertens. 2019;  
46 22  
47 2019:1–7.  
48 23  
49  
50  
51  
52  
53  
54  
55  
56  
57  
58  
59  
60

- 1  
2  
3 1 30. Gupta S, Virk A, Mittal A, Agarwal B. Patterns and determinants of healthcare-seeking  
4  
5 2 behavior among hypertensive patients in a rural population of north India: A mixed-  
6  
7 3 method study. *J Family Med Prim Care*. 2020; 9(6):2830  
8  
9  
10 4 31. Jayanna K, Swaroop N, Kar A, Ramanaik S, Pati MK, Pujar A, et al. Designing a  
11  
12 5 comprehensive Non-Communicable Diseases (NCD) programme for hypertension and  
13  
14 6 diabetes at primary health care level: evidence and experience from urban Karnataka,  
15  
16 7 South India. *BMC Public Health*. 2019; 19:1  
17  
18  
19 8 32. Krishnamoorthy Y, Giryappa DK, Eliyas SK, Priyan S, Saya GK, Lakshminarayanan  
20  
21 9 S. Patient and Provider's Experience and Perspective in Addressing Barriers to  
22  
23 10 Medication Adherence Among Noncommunicable Disease Patients in Rural  
24  
25 11 Puducherry, South India—A Qualitative Study. *J Patient Exp*. 2019; 6(3):216–23  
26  
27  
28 12 33. Kusuma YS. Migrants' Perceptions on Barriers to Treatment Seeking for Hypertension:  
29  
30 13 A Qualitative Study from Delhi, India. *Studies on Ethno-Medicine*. 2010; 4(3):173–6  
31  
32  
33 14 34. Miller V, Nambiar L, Saxena M, Leong D, Banerjee A et al. Exploring the barriers to  
34  
35 15 and facilitators of using evidence-based drugs in the secondary prevention of  
36  
37 16 cardiovascular diseases: findings from a multistakeholder, qualitative analysis. *Global*  
38  
39 17 *Heart*. 2018; 13(1):27-34.  
40  
41  
42 18 35. Newtonraj A, Arun S, Bazroy J, Tovia S. Lay perspectives on causes and complications  
43  
44 19 of hypertension; and barrier to access health care by known hypertensive patients: a  
45  
46 20 qualitative study from a rural area of South India. *Int J Community Med Public Health*.  
47  
48 21 2017; 4(3):704  
49  
50  
51 22 36. Nimesh VV, Halder A, Mitra A, Kumar S, Joshi A, Joshi R, et al. Patterns of healthcare  
52  
53 23 seeking behavior among persons with diabetes in Central India: A mixed method study.  
54  
55 24 *J Family Med Prim Care*. 2019; 8(2):677.  
56  
57  
58  
59  
60

- 1  
2  
3 1 37. Pati S, Van den Akker M, Schellevis FF, Sahoo K, Burgers JS. Managing diabetes  
4  
5 2 mellitus with comorbidities in primary healthcare facilities: a qualitative study among  
6  
7 3 physicians in Odisha, India. 2020. Research square [preprint] doi: 10.21203/rs.3.rs-  
8  
9 4 22272/v1  
10  
11  
12 5 38. Anitha Rani M, Shriram V. Are Patients With Type 2 Diabetes Not Aware or Are They  
13  
14 6 Unable to Practice Self-Care? A Qualitative Study in Rural South India. *J Prim Care*  
15  
16 7 *Community Health*. 2019; 10:2150132719865820.  
17  
18  
19 8 39. Salam A, Praveen D, Patel A, Tewari A, Webster R. Barriers and facilitators to the use  
20  
21 9 of cardiovascular fixed-dose combination medication (polypills) in Andhra Pradesh,  
22  
23 10 India: a mixed-methods study. *Global Heart*. 2019; 14(3):303-10.  
24  
25  
26 11 40. Satish P, Khetan A, Barbhaya D, Agarwal M, Mohan SK, Josephson R, Webel AR. A  
27  
28 12 qualitative study of facilitators and barriers to cardiovascular risk factor control in a  
29  
30 13 semiurban population in India. *J Family Med Prim Care*. 2019; 8(12):3773-3778.  
31  
32  
33 14 41. Thakur JS, Vijayvergiya R, Jaswal N, Ginsburg A. Assessment and barriers to  
34  
35 15 medication adherence for secondary prevention of cardiovascular disease among  
36  
37 16 patients with coronary artery disease in Chandigarh, India. *Int J Non-Commun Dis*.  
38  
39 17 2016;1:37-41.  
40  
41  
42 18 42. Venkatesan M, Dongre AR, Ganapathy K. A community-based study on diabetes  
43  
44 19 medication nonadherence and its risk factors in rural Tamil Nadu. *Indian J Community*  
45  
46 20 *Med*. 2018; 43(2):72-76  
47  
48  
49 21 43. Wood F, Salam A, Singh K, Day S, Jan S, Prabhakaran D, et al. Process evaluation of  
50  
51 22 the impact and acceptability of a polypill for prevention of cardiovascular disease. *BMJ*  
52  
53 23 *Open*. 2015; 5(9):e008018  
54  
55  
56  
57  
58  
59  
60

- 1  
2  
3 1 44. Saha S, Korthuis PT, Cohn JA, Sharp VL, Moore RD, Beach MC. Primary care  
4 provider cultural competence and racial disparities in HIV care and outcomes. *J Gen*  
5  
6 2 Intern Med. 2013;28(5):622-9. <https://doi.org/10.1007/s11606-012-2298-8>.  
7  
8 3  
9  
10 4 45. Sohal T, Sohal P, King-Shier KM, Khan NA. Barriers and Facilitators for Type-2  
11  
12 5 Diabetes Management in South Asians: A Systematic Review. *PLoS ONE*. 2015; 10(9):  
13  
14 6 e0136202.  
15  
16  
17 7 46. Sears K, Scobie A, MacKinnon NJ. Patient-related risk factors for self-reported  
18  
19 8 medication errors in hospital and community settings in 8 countries. *Can Pharm J:*  
20  
21 9 *Revue des Pharmaciens du Canada*. 2012 Mar;145(2):88-93.  
22  
23  
24 10 47. Nam S, Chesla C, Stotts NA, Kroon L, Janson SL. Barriers to diabetes management:  
25  
26 11 patient and provider factors. *Diabetes Res Clin Pract*. 2011; 93(1):1–9  
27  
28  
29 12 48. Lipton RB, Losey LM, Giachello A, Mendez J, Girotti MH. Attitudes and issues in  
30  
31 13 treating Latino patients with type 2 diabetes: views of healthcare providers. *Diabetes*  
32  
33 14 *Educ*. 1998; 24: 67–71  
34  
35  
36 15 49. Sridharan SG, Chittem M, Maya S. Patients' Experiences of Barriers and Facilitators  
37  
38 16 for Adherence to Type 2 Diabetes Mellitus: A Meta-Ethnography. *Journal of Social*  
39  
40 17 *Health and Diabetes*. 2019 Dec;7(02):61-72.  
41  
42  
43 18 50. Al Hamid A, Ghaleb M, Aljadhey H, et al. A systematic review of qualitative research  
44  
45 19 on the contributory factors leading to medicine-related problems from the perspectives  
46  
47 20 of adult patients with cardiovascular diseases and diabetes mellitus. *BMJ Open* 2014;  
48  
49 21 4:e005992.  
50  
51  
52 22 51. Toews I, Booth A, Berg RC et al. Further exploration of dissemination bias in  
53  
54 23 qualitative research required to facilitate assessment within qualitative evidence  
55  
56 24 synthesis. *J Clin Epidemiol* 2017; 88:133–139  
57  
58  
59 25  
60

1  
2  
3  
4  
5  
6  
7  
8  
9  
10  
11  
12  
13  
14  
15  
16  
17  
18  
19  
20  
21  
22  
23  
24  
25  
26  
27  
28  
29  
30  
31  
32  
33  
34  
35  
36  
37  
38  
39  
40  
41  
42  
43  
44  
45  
46  
47  
48  
49  
50  
51  
52  
53  
54  
55  
56  
57  
58  
59  
60

1 **Figure 1: Flow chart showing the search strategy and selection of studies**

2

For peer review only



**Table 1: Characteristics of the studies included (N=18)**

| S.No | Author and year           | State      | Data collection method | Study participants                                                 | Study setting   | Approach    | Coding    | Theoretical framework used | Method of analysis      | Sample size         | Mean Age in years             | Study quality |
|------|---------------------------|------------|------------------------|--------------------------------------------------------------------|-----------------|-------------|-----------|----------------------------|-------------------------|---------------------|-------------------------------|---------------|
| 1.   | Agarwal 2019              | Kerala     | IDI                    | Clinical and administrative staff                                  | Facility based  | NR          | Inductive | NR                         | Dedoose Software        | 21                  | NR                            | ***           |
| 2.   | Dhar et al 2016           | Delhi      | IDI                    | Hypertensive women aged 35-59 years                                | Community based | NR          | Inductive | Yes                        | Manual content analysis | 30                  | 48                            | ***           |
| 3.   | George et al 2016         | Karnataka  | IDI                    | Physicians providing Non communicable disease care                 | Community based | NR          | Inductive | NR                         | Manual content analysis | 36                  | 46                            | ***           |
| 4.   | Gupta et al 2019          | Rajasthan  | IDI                    | Hypertensive women                                                 | Facility based  | NR          | NR        | NR                         | Manual content analysis | 30                  | 56                            | **            |
| 5.   | Gupta et al 2020          | Haryana    | IDI                    | Hypertension patients                                              | Facility based  | NR          | NR        | NR                         | Manual content analysis | 100                 | 38-76                         | ***           |
| 6.   | Jayanna et al 2019        | Karnataka  | IDI & FGD              | Diabetes and Hypertension patients                                 | Facility based  | NR          | NR        | Yes                        | Manual content analysis | 10 IDI + 20 FGDs    | NR                            | ***           |
| 7.   | Krishnamoorthy et al 2018 | Puducherry | IDI & KII              | Diabetes and Hypertension patients & Healthcare workers            | Community based | NR          | Inductive | NR                         | Manual content analysis | 6 IDI + 4 KII       | NR                            | ***           |
| 8.   | Kusuma et al 2010         | Delhi      | KII & FGD              | Recent and Settled Migrants having hypertension inhabited in Delhi | Community based | NR          | NR        | NR                         | Manual content analysis | 14 (KII) + 20 (FGD) | 38 – 50 (KII) & 25 – 40 (FGD) | ***           |
| 9.   | Miller et al 2017         | Delhi      | IDI                    | Cardiovascular disease patients                                    | Trial based     | Descriptive | NR        | NR                         | Manual content analysis | 14                  | NR                            | ***           |
| 10.  | Newtonraj et al 2017      | Tamil Nadu | Personal interviews    | Hypertensive patients                                              | Community based | NR          | NR        | NR                         | Manual content analysis | 40                  | NR                            | **            |

|     |                       |                     |           |                                            |                 |             |           |     |                           |    |    |     |
|-----|-----------------------|---------------------|-----------|--------------------------------------------|-----------------|-------------|-----------|-----|---------------------------|----|----|-----|
| 11. | Nimesh et al 2019     | Madhya Pradesh      | IDI       | Individuals with diabetes                  | Community based | NR          | Inductive | Yes | Manual content analysis   | 60 | 52 | *** |
| 12. | Patti et al 2020      | Orissa              | IDI       | Primary care physicians                    | Facility based  | NR          | NR        | NR  | Manual content analysis   | 17 | 40 | *** |
| 13. | Rani et al 2019       | Tamil Nadu          | FGD       | Individuals with diabetes                  | Community based | Descriptive | NR        | NR  | Manual content analysis   | 50 | 50 | **  |
| 14. | Salaam et al 2019     | Andhra Pradesh      | IDI       | Patients with Cardiovascular disease       | Community based | NR          | NR        | Yes | NVivo version 11 software | 12 | 62 | *** |
| 15. | Satish et al 2019     | West Bengal         | FGD       | Patients with hypertension and/or diabetes | Trial based     | NR          | NR        | Yes | Manual content analysis   | 70 | 53 | *** |
| 16. | Thakur et al 2016     | Chandigarh          | IDI & FGD | Coronary artery disease patients           | Facility based  | NR          | NR        | NR  | Manual Thematic analysis  | 20 | NR | *   |
| 17. | Venkatesan et al 2018 | Tamil Nadu          | IDI       | Health care workers                        | Community based | NR          | NR        | NR  | Anthropac software        | 10 | NR | *** |
| 18. | Wood et al 2015       | Hyderabad and Delhi | IDI       | Patients with Cardiovascular diseases      | Trial based     | NR          | NR        | Yes | NVivo software            | 52 | 57 | *** |

NR – Not Reported

IDI – In depth Interview

FGD – Focussed Group Discussion

KII – Key informant interview

Table 2: Thematic framework analysis for summarizing barriers in medication adherence experienced by CVD &amp; DM patients in India

| Main theme/Sub-themes                                                                                 | Barriers in Medication Adherence                                                                                                                                              | Studies                                                                                                                                                                                                                      |
|-------------------------------------------------------------------------------------------------------|-------------------------------------------------------------------------------------------------------------------------------------------------------------------------------|------------------------------------------------------------------------------------------------------------------------------------------------------------------------------------------------------------------------------|
| <b>PATIENTS</b>                                                                                       | <b>1. Lack of awareness/knowledge:</b> Lack of knowledge and understanding about the disease, its complications and treatment among the patients                              | <b>Dhar et al 2016, George et al 2016, Gupta et al 2019, Krishnamoorthy et al 2018, Kusuma et al 2010, Newtonraj et al 2017, Patti et al 2020, Tan et al 2017, Thakur et al 2016, Venkatesan et al 2018, Wood et al 2015</b> |
|                                                                                                       | <b>2. Forgetfulness:</b> Patients forget to take medicine because of busy schedule                                                                                            | <b>Dhar et al 2016, Gupta et al 2019, Gupta et al 2020, Rani et al 2019, Venkatesan et al 2018, Wood et al 2015, Tan et al 2017, Thakur et al 2016</b>                                                                       |
|                                                                                                       | <b>3. Misconception about medications:</b> Patient has wrong perception about the medications, especially about its side effects and quality                                  | <b>George et al 2016, Gupta et al 2020, Patti et al 2020, Rani et al 2019, Salaam et al 2019, Tan et al 2017, Venkatesan et al 2018</b>                                                                                      |
|                                                                                                       | <b>4. Preference to alternate system of medicine:</b> Patients prefers taking herbal and other alternate system of medicines for their condition                              | <b>George et al 2016, Tan et al 2017, Venkatesan et al 2018</b>                                                                                                                                                              |
|                                                                                                       | <b>5. Ill effects of substance abuse:</b> Patients have difficulty in adhering to medications during the bout of tobacco or alcohol consumption                               | <b>Jayanna et al 2019, Krishnamoorthy et al 2018</b>                                                                                                                                                                         |
|                                                                                                       | <b>6. Effect of side effects:</b> Patients stop their medication once they develop side effects related to the drugs                                                          | <b>Venkatesan et al 2018, Wood et al 2015</b>                                                                                                                                                                                |
|                                                                                                       | <b>7. Stress:</b> Patients developing stress due to personal or work-related problems are more non-adherent to medications                                                    | <b>Krishnamoorthy et al 2018</b>                                                                                                                                                                                             |
|                                                                                                       | <b>8. Stigma:</b> Patients feel stigmatised in revealing their disease status to other family/friends leading to lack of support from them                                    | <b>Krishnamoorthy et al 2018</b>                                                                                                                                                                                             |
| <b>CARE TEAM<br/>(Frontline care providers - Healthcare professionals, family members and others)</b> | <b>1. Family support:</b> Lack of physical, emotional and social support as the family members are pre-occupied with domestic works, crisis, other priorities and commitments | <b>Dhar et al 2016, George et al 2016, Gupta et al 2020, Krishnamoorthy et al 2018, Kusuma et al 2010, Newtonraj et al 2017, Rani et al 2019, Wood et al 2015</b>                                                            |
|                                                                                                       | <b>2. Risk communication:</b> Poor risk communication or counselling to patients and family members about non-adherence to medication by the treating physicians              | <b>Dhar et al 2016, George et al 2016, Gupta et al 2019, Krishnamoorthy et al 2018, Miller et al 2017, Thakur et al 2016</b>                                                                                                 |
|                                                                                                       | <b>3. Physician attitude:</b> Lack of respect, empathy, communication and attention towards patients by the treating physicians                                               | <b>Dhar et al 2016, Gupta et al 2019, Kusuma et al 2010, Jayanna et al 2019</b>                                                                                                                                              |

|                                                               |                                                                                                                                                                                                                                                 |                                                                                                                                                                                                                                                                                 |
|---------------------------------------------------------------|-------------------------------------------------------------------------------------------------------------------------------------------------------------------------------------------------------------------------------------------------|---------------------------------------------------------------------------------------------------------------------------------------------------------------------------------------------------------------------------------------------------------------------------------|
| <b>HEALTHCARE ORGANIZATION<br/>(Infrastructure/Resources)</b> | <b>1. Affordability:</b> Patients lose their daily wages due to inconvenient consultation timings in public facilities, which is aggravated by travel costs due to poor access, and higher medication costs while preferring private facilities | <b>Agarwal et al 2019, Dhar et al 2016, George et al 2016, Gupta et al 2019, Gupta et al 2020, Jayanna et al 2019, Kusuma et al 2010, Miller et al 2017, Nimesh et al 2019, Salaam et al 2019, Satish et al 2019, Thakur et al 2016, Venkatesan et al 2018, Wood et al 2015</b> |
|                                                               | <b>2. Accessibility:</b> Lack of access to healthcare facilities (more distance) requiring longer travel and waiting time.                                                                                                                      | <b>Dhar et al 2016, George et al 2016, Gupta et al 2019, Gupta et al 2020, Jayanna et al 2019, Krishnamoorthy et al 2018, Kusuma et al 2010, Miller et al 2017, Newtonraj et al 2017, Tan et al 2017, Thakur et al 2016, Venkatesan et al 2018, Wood et al 2015</b>             |
|                                                               | <b>3. Availability:</b> Non-availability of essential medicines in public healthcare facilities                                                                                                                                                 | <b>Dhar et al 2016, Jayanna et al 2019, Kusuma et al 2010, Miller et al 2017, Newtonraj et al 2017, Patti et al 2020, Salaam et al 2019, Wood et al 2015</b>                                                                                                                    |
|                                                               | <b>4. Acceptability:</b> Medications from public health facilities are not acceptable to the patients due to poorer quality                                                                                                                     |                                                                                                                                                                                                                                                                                 |
|                                                               | <b>5. Overburdening of primary health centres:</b> Burdening of primary health facilities lead to time constraints in patient counselling regarding medication adherence                                                                        | <b>Jayanna et al 2019, Krishnamoorthy et al 2018, Miller et al 2017, Patti et al 2020, Venkatesan et al 2018</b>                                                                                                                                                                |

Table 3: Thematic framework for summarizing facilitators in medication adherence experienced by CVD &amp; DM patients in India

| Main theme/Sub-themes                                                                                 | Facilitators in Medication Adherence                                                                                                                                                                                                                    | Studies                                                                                                                   |
|-------------------------------------------------------------------------------------------------------|---------------------------------------------------------------------------------------------------------------------------------------------------------------------------------------------------------------------------------------------------------|---------------------------------------------------------------------------------------------------------------------------|
| <b>PATIENTS</b>                                                                                       | <b>1. Self-awareness and fear:</b> Patient's understanding about medicine adherence and fear about complications of non-adherence keeps them healthy                                                                                                    | <b>Krishnamoorthy et al 2018, Miller et al 2017, Patti et al 2020, Satish et al 2019, Tan et al 2017, Wood et al 2015</b> |
|                                                                                                       | <b>2. Medicine Reminder system:</b> Separate pill boxes/cases/covers, personalized shelf, and maintaining drug record notebook helps them in remembering daily doses                                                                                    | <b>Dhar et al 2016, Krishnamoorthy et al 2018, Miller et al 2017, Tan et al 2017</b>                                      |
|                                                                                                       | <b>3. Integrating drug intake with the daily routine:</b> Fixed time for medicine intake, separate place for keeping drug, and making arrangements during travel helps them in adherence                                                                | <b>Dhar et al 2016, Krishnamoorthy et al 2018</b>                                                                         |
|                                                                                                       | <b>4. Positive peer influence:</b> Good adherence to medication by the patient's peers motivates the patient to be compliance to their own drug intake                                                                                                  | <b>Gupta et al 2019, Krishnamoorthy et al 2018</b>                                                                        |
| <b>CARE TEAM<br/>(Frontline care providers - Healthcare professionals, family members and others)</b> | <b>1. Family support:</b> Constant reminders by family members for drug intake                                                                                                                                                                          | <b>Dhar et al 2016, Gupta et al 2020, Krishnamoorthy et al 2018, Miller et al 2017, Wood et al 2015</b>                   |
|                                                                                                       | <b>2. Past adverse experiences:</b> Death of patients' own family members due to complications of the condition has motivated them to adhere to medication                                                                                              | <b>Dhar et al 2016, Krishnamoorthy et al 2018</b>                                                                         |
|                                                                                                       | <b>3. Healthcare provider counselling and empathy:</b> Patients described that counselling from their healthcare providers has motivated them to remain adherent                                                                                        | <b>Kusuma et al 2010, Miller et al 2017, Patti et al 2020, Salaam et al 2019, Tan et al 2017</b>                          |
|                                                                                                       | <b>4. Trust in physician:</b> Adherence is more when a positive rapport and trust is established between the patient and health care providers.                                                                                                         | <b>Dhar et al 2016, Krishnamoorthy et al 2018, Satish et al 2019</b>                                                      |
| <b>HEALTHCARE ORGANIZATION<br/>(Infrastructure/Resources)</b>                                         | <b>1. Dedicated pill boxes/covers:</b> Provision of different medications in separate boxes/covers in the healthcare facility has helped as the patient to remember which medication to take at what time                                               | <b>Krishnamoorthy et al 2018, Wood et al 2015</b>                                                                         |
|                                                                                                       | <b>2. Combination drugs (polypills):</b> Polypills had the following advantages to facilitate the medication adherence: a smaller number of pills, lower frequency, less chance of forgetting, potential for lower cost, and convenient simpler regimen | <b>Salaam et al 2019, Wood et al 2015</b>                                                                                 |
|                                                                                                       | <b>3. Availability of medications:</b> Proper pharmacy inventory control and stock delivery has aided in medication adherence                                                                                                                           | <b>Miller et al 2017</b>                                                                                                  |
| <b>ENVIRONMENT<br/>(Regulatory, market and policy framework)</b>                                      | <b>1. NGO Support:</b> Patients has reported that sharing their concerns and receiving counselling from NGO/ Health officers acted as a facilitator for drug intake                                                                                     | <b>Tan et al 2017, Wood et al 2015</b>                                                                                    |

**Table 4: Thematic framework for summarizing suggestions to improve medication adherence among CVD & DM patients in India**

| Main theme/Sub-themes                                                                                         | Suggestions to improve medication adherence                                                                                                                                                                                                                                                                                                       | Studies                                                                                                                                                                                                         |
|---------------------------------------------------------------------------------------------------------------|---------------------------------------------------------------------------------------------------------------------------------------------------------------------------------------------------------------------------------------------------------------------------------------------------------------------------------------------------|-----------------------------------------------------------------------------------------------------------------------------------------------------------------------------------------------------------------|
| <b>PATIENTS</b>                                                                                               | <b>1. Peer support groups:</b> Patients can motivate each other by forming support groups among themselves                                                                                                                                                                                                                                        | <b>Krishnamoorthy et al 2018</b>                                                                                                                                                                                |
|                                                                                                               | <b>2. Digital reminder system:</b> Patient can use digital reminders such as watch, mobile phone to adhere to their drug schedule                                                                                                                                                                                                                 | <b>Krishnamoorthy et al 2018, Miller et al 2017</b>                                                                                                                                                             |
| <b>CARE TEAM<br/>(Frontline care providers -<br/>Healthcare professionals,<br/>family members and others)</b> | <b>1. Social support:</b> Family members can be educated and asked to provide support by reinforcing compliance, reminding about drug intake, motivating them patients to avoid substance abuse                                                                                                                                                   | <b>Agarwal et al 2019, Dhar et al 2016, Krishnamoorthy et al 2018, Nimesh et al 2019, Wood et al 2015</b>                                                                                                       |
|                                                                                                               | <b>2. Financial support:</b> Family members can provide financial support to cover the cost of medications, travel etc.                                                                                                                                                                                                                           | <b>Gupta et al 2019</b>                                                                                                                                                                                         |
|                                                                                                               | <b>3. Regular training of healthcare workers:</b> Physicians and other healthcare workers involved in prescribing drugs and counselling should undergo regular training on standard treatment protocols                                                                                                                                           | <b>George et al 2016, Jayanna et al 2019, Miller et al 2017, Patti et al 2020, Satish et al 2019</b>                                                                                                            |
|                                                                                                               | <b>4. Team work approach:</b> Integration of AYUSH, mental health counsellors, physiotherapist and geriatric clinics at primary healthcare level                                                                                                                                                                                                  | <b>George et al 2016, Miller et al 2017, Patti et al 2020</b>                                                                                                                                                   |
| <b>HEALTHCARE ORGANIZATION<br/>(Infrastructure/Resources)</b>                                                 | <b>1. Innovations in patient care:</b> Healthcare workers can make innovations like dedicated day for specific conditions (diabetes day, etc), dedicated counselling station/session with additional staff for detailing the importance of adherence and complications related to non-adherence, unique pill dispensing mechanism (colour coding) | <b>Agarwal et al 2019, Dhar et al 2016, Jayanna et al 2019, Krishnamoorthy et al 2018, Miller et al 2017, Newtonraj et al 2017, Patti et al 2020, Satish et al 2019, Venkatesan et al 2018, Wood et al 2015</b> |
|                                                                                                               | <b>2. IEC/BCC/Awareness campaigns:</b> Putting up of IEC materials and conducting campaigns on importance of adherence in public places and workplaces                                                                                                                                                                                            | <b>Dhar et al 2016, George et al 2016, Gupta et al 2019, Gupta et al 2020, Jayanna et al 2019, Krishnamoorthy et al 2018, Newtonraj et al 2017, Patti et al 2020, Rani et al 2019</b>                           |
|                                                                                                               | <b>3. Digitalizing patient treatment record:</b> Digitalizing a dedicated treatment record for each patient can help in better follow-up of the patient and improve adherence                                                                                                                                                                     | <b>Jayanna et al 2019, Miller et al 2017, Patti et al 2020, Satish et al 2019, Wood et al 2015</b>                                                                                                              |
|                                                                                                               | <b>4. Polypills:</b> Disseminating the advantages of polypills to healthcare professionals by CME/conferences and patients by public education campaigns; Integration of polypills into clinical practice. etc                                                                                                                                    | <b>Salaam et al 2019, Wood et al 2015</b>                                                                                                                                                                       |
| <b>ENVIRONMENT<br/>(Regulatory, market and policy framework)</b>                                              | <b>1. Linkage of health services with NGO and community-based organizations:</b> Community members, volunteers, anganwadi workers, self-help groups and NGO workers can be trained in counselling the patients to improve medication adherence                                                                                                    | <b>Dhar et al 2016, Jayanna et al 2019, Krishnamoorthy et al 2018, Kusuma et al 2010, Miller et al 2017, Tan et al 2017</b>                                                                                     |

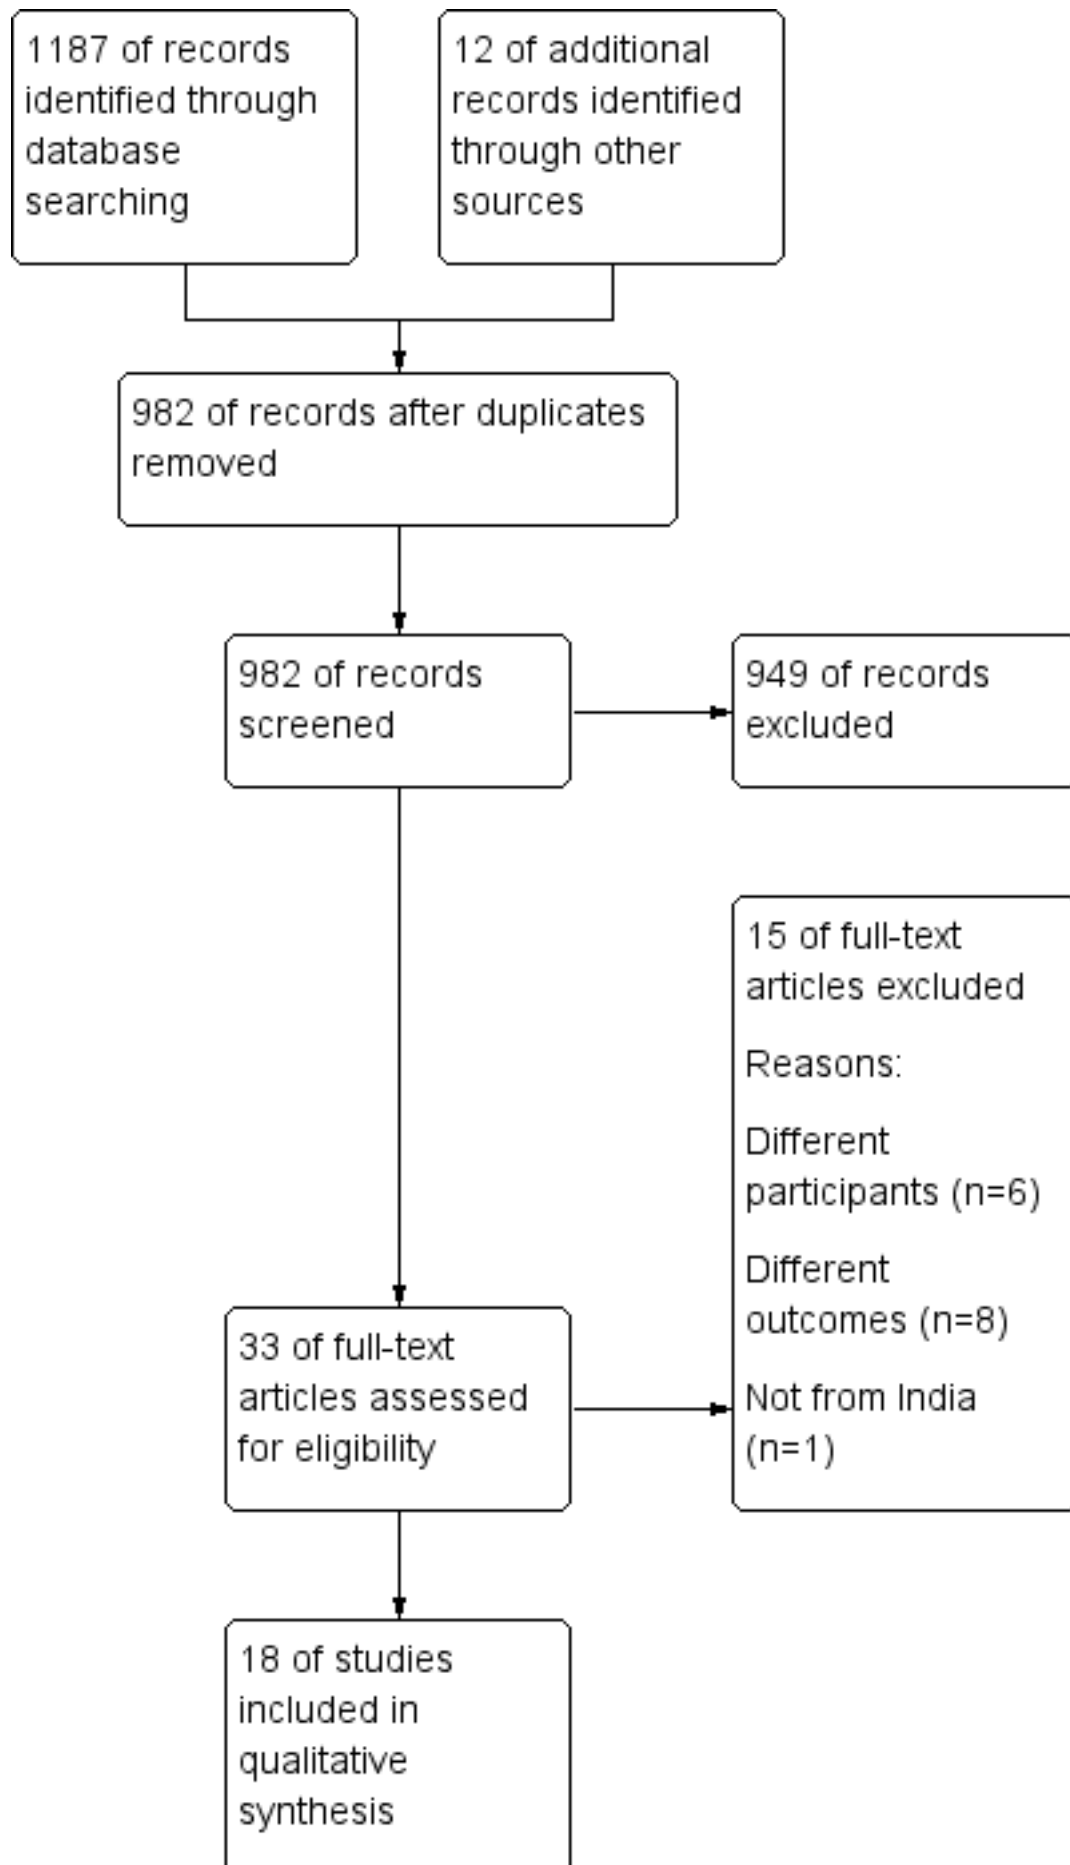

## Supplementary file 1. Enhancing transparency in reporting the synthesis of qualitative research: ENTREQ Checklist (Tong, *et al.*, 2012)

| Item No.                      | Guide and Description                                                                                                                                                                                                                                                                                                                                                                          | Report Location                          |
|-------------------------------|------------------------------------------------------------------------------------------------------------------------------------------------------------------------------------------------------------------------------------------------------------------------------------------------------------------------------------------------------------------------------------------------|------------------------------------------|
| 1. Aim                        | State the research question the synthesis addresses                                                                                                                                                                                                                                                                                                                                            | P 6, 1-13                                |
| 2. Synthesis methodology      | Identify the synthesis methodology or theoretical framework which underpins the synthesis, and describe the rationale for choice of methodology (e.g. meta-ethnography, thematic synthesis, critical interpretive synthesis, grounded theory synthesis, realist synthesis, meta-aggregation, meta-study, framework synthesis)                                                                  | P9, 16-25<br>P10, 1-22                   |
| 3. Approach to searching      | Indicate whether the search was pre-planned (comprehensive search strategies to seek all available studies) or iterative (to seek all available concepts until they theoretical saturation is achieved)                                                                                                                                                                                        | P8, 1-10                                 |
| 4. Inclusion criteria         | Specify the inclusion/exclusion criteria (e.g. in terms of population, language, year limits, type of publication, study type)                                                                                                                                                                                                                                                                 | P7, 3-23                                 |
| 5. Data sources               | Describe the information sources used (e.g. electronic databases (MEDLINE, EMBASE, CINAHL, psycINFO), grey literature databases (digital thesis, policy reports), relevant organisational websites, experts, information specialists, generic web searches (Google Scholar) hand searching, reference lists) and when the searches conducted; provide the rationale for using the data sources | P8, 1-10                                 |
| 6. Electronic Search strategy | Describe the literature search (e.g. provide electronic search strategies with population terms, clinical or health topic terms, experiential or social phenomena related terms, filters for qualitative research, and search limits)                                                                                                                                                          | Supplementary file 1                     |
| 7. Study screening methods    | Describe the process of study screening and sifting (e.g. title, abstract and full text review, number of independent reviewers who screened studies)                                                                                                                                                                                                                                          | Figure 1                                 |
| 8. Study characteristics      | Present the characteristics of the included studies (e.g. year of publication, country, population, number of participants, data collection, methodology, analysis, research questions)                                                                                                                                                                                                        | Table 1                                  |
| 9. Study selection results    | Identify the number of studies screened and provide reasons for study exclusion (e.g. for comprehensive searching, provide numbers of studies screened and reasons for exclusion indicated in a figure/flowchart; for iterative searching describe reasons for study exclusion and inclusion based on modifications to the research question and/or contribution to theory development)        | Fig 1 - PRISMA flow diagram<br>P11, 6-18 |
| 10. Rationale for appraisal   | Describe the rationale and approach used to appraise the included studies or selected findings (e.g. assessment of conduct (validity and robustness),                                                                                                                                                                                                                                          | P11, 14-18<br>Table 1                    |



|                          |                                                                                                                                                                                                                                                                                             |                              |
|--------------------------|---------------------------------------------------------------------------------------------------------------------------------------------------------------------------------------------------------------------------------------------------------------------------------------------|------------------------------|
|                          | assessment of reporting (transparency), assessment of content and utility of the findings)                                                                                                                                                                                                  |                              |
| 11. Appraisal items      | State the tools, frameworks and criteria used to appraise the studies or selected findings (e.g. Existing tools: CASP, QARI, COREQ, Mays and Pope [25]; reviewer developed tools; describe the domains assessed: research team, study design, data analysis and interpretations, reporting) | P9, 3-14<br>Table 1          |
| 12. Appraisal process    | Indicate whether the appraisal was conducted independently by more than one reviewer and if consensus was required                                                                                                                                                                          | P8, 11-17                    |
| 13. Appraisal results    | Present results of the quality assessment and indicate which articles, if any, were weighted/excluded based on the assessment and give the rationale                                                                                                                                        | P11, 14-18<br>Table 1        |
| 14. Data extraction      | Indicate which sections of the primary studies were analysed and how were the data extracted from the primary studies? (e.g. all text under the headings "results /conclusions" were extracted electronically and entered into a computer software)                                         | P8, 18-25                    |
| 15. Software             | State the computer software used, if any                                                                                                                                                                                                                                                    | None used                    |
| 16. Number of reviewers  | Identify who was involved in coding and analysis                                                                                                                                                                                                                                            | P9, 16-22                    |
| 17. Coding               | Describe the process for coding of data (e.g. line by line coding to search for concepts)                                                                                                                                                                                                   | P9, 23-35<br>P10, 1-22       |
| 18. Study comparison     | Describe how were comparisons made within and across studies (e.g. subsequent studies were coded into pre-existing concepts, and new concepts were created when deemed necessary)                                                                                                           | Table 2                      |
| 19. Derivation of themes | Explain whether the process of deriving the themes or constructs was inductive or deductive                                                                                                                                                                                                 | Inductive process<br>Table 2 |
| 20. Quotations           | Provide quotations from the primary studies to illustrate themes/constructs, and identify whether the quotations were participant quotations of the author's interpretation                                                                                                                 | Table 2                      |
| 21. Synthesis output     | Present rich, compelling and useful results that go beyond a summary of the primary studies (e.g. new interpretation, models of evidence, conceptual models, analytical framework, development of a new theory or construct)                                                                | P11-14                       |

**Supplementary Table 2: Detailed search strategy**

| Key word                             | Alternative word                                                                                                                                                                                                                                                                                                                                                                                                                                                                                                                                                            |
|--------------------------------------|-----------------------------------------------------------------------------------------------------------------------------------------------------------------------------------------------------------------------------------------------------------------------------------------------------------------------------------------------------------------------------------------------------------------------------------------------------------------------------------------------------------------------------------------------------------------------------|
| Qualitative studies                  | ((((((((Qualitative Research[MeSH Terms]) OR Focus Groups[MeSH Terms]) OR Anthropology, Cultural[MeSH Terms]) OR Ethnopsychology[MeSH Terms]) OR Grounded Theory[MeSH Terms]) OR Nursing Methodology Research[MeSH Terms]) OR Narrative Medicine[MeSH Terms]) OR Tape Recording[MeSH Terms]) OR Culture[MeSH Terms]) OR Attitude[MeSH Terms] Case studies OR Focused group discussions OR phenomenological studies OR ethnographic studies OR interviews))                                                                                                                  |
| Medication Adherence                 | ((((((((((((((((Medication Adherence[MeSH Terms]) OR Patient Compliance[MeSH Terms]) OR No-Show Patients[MeSH Terms]) OR Health Personnel[MeSH Terms]) OR drug effects [Subheading]) OR (Treatment Adherence[MeSH Terms] OR Compliance[MeSH Terms])) OR Self Medication[MeSH Terms]) OR Self Administration[MeSH Terms]) OR Patient Medication Knowledge[MeSH Terms]) OR Attitude to Health[MeSH Terms]) OR Patient Acceptance of Health Care[MeSH Terms])) OR Patient Preference[MeSH Terms]) OR Patient Acceptance of Health Care[MeSH Terms]) OR Motivation[MeSH Terms]) |
| Barriers, Facilitators and solutions | Challenges OR Challenge OR Problem OR Problems barriers OR Difficulties OR Issues OR Limitations OR Obstacles OR Facilitators OR Suggestions OR Solutions                                                                                                                                                                                                                                                                                                                                                                                                                   |
| Diabetes mellitus and CVDs           | ((((Diabetes Mellitus[MeSH Terms]) OR Cardiovascular Diseases[MeSH Terms] OR Hypertension[MeSH Terms] OR Coronary Disease[MeSH Terms] OR Coronary Artery Disease[MeSH Terms] OR Heart Diseases[MeSH Terms] OR Cerebrovascular Diseases[MeSH Terms] OR Stroke[MeSH Terms]))                                                                                                                                                                                                                                                                                                  |

|       |                                                       |
|-------|-------------------------------------------------------|
| India | (India[MeSH Terms] OR Republic of India[MeSH Terms])) |
|-------|-------------------------------------------------------|

### Search results (PubMed):

((((Diabetes Mellitus[MeSH Terms]) OR Cardiovascular Diseases[MeSH Terms] OR Hypertension[MeSH Terms])) AND (((((((((((((((Medication Adherence[MeSH Terms] OR Patient Compliance[MeSH Terms] OR No-Show Patients[MeSH Terms] OR Health Personnel[MeSH Terms] OR drug effects [Subheading]) OR (Treatment Adherence[MeSH Terms] OR Compliance[MeSH Terms])) OR Self Medication[MeSH Terms] OR Self Administration[MeSH Terms] OR Patient Medication Knowledge[MeSH Terms] OR Attitude to Health[MeSH Terms] OR Patient Acceptance of Health Care[MeSH Terms])) OR Patient Preference[MeSH Terms] OR Patient Acceptance of Health Care[MeSH Terms] OR Motivation[MeSH Terms] OR Life Change Events[MeSH Terms] OR Trust[MeSH Terms]))) AND (((((((Qualitative Research[MeSH Terms] OR Focus Groups[MeSH Terms] OR Anthropology, Cultural[MeSH Terms] OR Ethnopsychology[MeSH Terms] OR Grounded Theory[MeSH Terms] OR Nursing Methodology Research[MeSH Terms] OR Narrative Medicine[MeSH Terms] OR Tape Recording[MeSH Terms] OR Culture[MeSH Terms] OR Attitude[MeSH Terms])) AND (India[MeSH Terms] OR Republic of India[MeSH Terms])) – 199 (Filters: Years between 2010 and 2020 and English language publication)

((((((((((((Qualitative Research[MeSH Terms] OR Focus Groups[MeSH Terms] OR Anthropology, Cultural[MeSH Terms] OR Ethnopsychology[MeSH Terms] OR Grounded Theory[MeSH Terms] OR Nursing Methodology Research[MeSH Terms] OR Narrative Medicine[MeSH Terms] OR Tape Recording[MeSH Terms] OR Culture[MeSH Terms] OR Attitude[MeSH Terms] Case studies OR Focused group discussions OR phenomenological studies OR ethnographic studies OR interviews))) AND (((((((((((Medication Adherence[MeSH Terms] OR Patient Compliance[MeSH Terms] OR No-Show Patients[MeSH Terms] OR Health Personnel[MeSH Terms] OR drug effects [Subheading]) OR (Treatment Adherence[MeSH Terms] OR Compliance[MeSH Terms])) OR Self Medication[MeSH Terms] OR Self Administration[MeSH Terms] OR Patient Medication Knowledge[MeSH Terms] OR Attitude to Health[MeSH Terms] OR Patient Acceptance of Health Care[MeSH Terms])) OR Patient Preference[MeSH Terms] OR Patient Acceptance of Health Care[MeSH Terms] OR Motivation[MeSH Terms])) AND (Challenges OR Challenge OR Problem OR Problems barriers OR Difficulties OR Issues OR Limitations OR Obstacles OR Facilitators OR Suggestions OR Solutions)) AND (((((((Diabetes Mellitus[MeSH Terms] OR Cardiovascular Diseases[MeSH Terms] OR Hypertension[MeSH Terms] OR Coronary Disease[MeSH Terms] OR Coronary Artery Disease[MeSH Terms] OR Heart Diseases[MeSH Terms] OR Cerebrovascular Diseases[MeSH Terms] OR Stroke[MeSH Terms]))) AND ((India[MeSH Terms] OR Republic of India[MeSH Terms])) – 31 results (Filters: Years between 2010 and 2020 and English language publication)

**Google scholar:** 635 + 22 + 6 + 12 = 675

1  
2  
3 **ScienceDirect:** (Diabetes Mellitus OR Cardiovascular Diseases OR Hypertension) AND  
4 (Qualitative Study OR Qualitative) AND (India) AND (Adherence) – 238 articles  
5

6 **Cochrane library:** (Diabetes Mellitus OR Cardiovascular Diseases OR Hypertension) AND  
7 (Qualitative Study OR Qualitative) AND (India) AND (Adherence) – 34 articles  
8  
9  
10  
11  
12  
13  
14  
15  
16  
17  
18  
19  
20  
21  
22  
23  
24  
25  
26  
27  
28  
29  
30  
31  
32  
33  
34  
35  
36  
37  
38  
39  
40  
41  
42  
43  
44  
45  
46  
47  
48  
49  
50  
51  
52  
53  
54  
55  
56  
57  
58  
59  
60

For peer review only
