# Supplementary material for: Patient and provider’s perspective on barriers and facilitators for medication adherence among adult patients with cardiovascular diseases and diabetes mellitus in India: a qualitative evidence synthesis
Source: PubMed Central journal article supplement — BMJ Open. 2022 Mar 23;12(3):e055226. doi: 10.1136/bmjopen-2021-055226 (PMC8948385; doi:10.1136/bmjopen-2021-055226), 2022-03-23
Supplement: bmjopen-2021-055226supp002.pdf [file bmjopen-2021-055226supp002.pdf]

**Supplementary Table 2: Detailed search strategy**

| <b>Key word</b>                      | <b>Alternative word</b>                                                                                                                                                                                                                                                                                                                                                                                                                                                                                                                                                       |
|--------------------------------------|-------------------------------------------------------------------------------------------------------------------------------------------------------------------------------------------------------------------------------------------------------------------------------------------------------------------------------------------------------------------------------------------------------------------------------------------------------------------------------------------------------------------------------------------------------------------------------|
| Qualitative studies                  | ((((((((((Qualitative Research[MeSH Terms]) OR Focus Groups[MeSH Terms]) OR Anthropology, Cultural[MeSH Terms]) OR Ethnopsychology[MeSH Terms]) OR Grounded Theory[MeSH Terms]) OR Nursing Methodology Research[MeSH Terms]) OR Narrative Medicine[MeSH Terms]) OR Tape Recording[MeSH Terms]) OR Culture[MeSH Terms]) OR Attitude[MeSH Terms] Case studies OR Focused group discussions OR phenomenological studies OR ethnographic studies OR interviews))                                                                                                                  |
| Medication Adherence                 | ((((((((((((((((((Medication Adherence[MeSH Terms]) OR Patient Compliance[MeSH Terms]) OR No-Show Patients[MeSH Terms]) OR Health Personnel[MeSH Terms]) OR drug effects [Subheading]) OR (Treatment Adherence[MeSH Terms] OR Compliance[MeSH Terms])) OR Self Medication[MeSH Terms]) OR Self Administration[MeSH Terms]) OR Patient Medication Knowledge[MeSH Terms]) OR Attitude to Health[MeSH Terms]) OR Patient Acceptance of Health Care[MeSH Terms])) OR Patient Preference[MeSH Terms]) OR Patient Acceptance of Health Care[MeSH Terms]) OR Motivation[MeSH Terms]) |
| Barriers, Facilitators and solutions | Challenges OR Challenge OR Problem OR Problems barriers OR Difficulties OR Issues OR Limitations OR Obstacles OR Facilitators OR Suggestions OR Solutions                                                                                                                                                                                                                                                                                                                                                                                                                     |
| Diabetes mellitus and CVDs           | ((((((Diabetes Mellitus[MeSH Terms]) OR Cardiovascular Diseases[MeSH Terms] OR Hypertension[MeSH Terms] OR Coronary Disease[MeSH Terms] OR Coronary Artery Disease[MeSH Terms] OR Heart Diseases[MeSH Terms] OR Cerebrovascular Diseases[MeSH Terms] OR Stroke[MeSH Terms]))                                                                                                                                                                                                                                                                                                  |

|       |                                                       |
|-------|-------------------------------------------------------|
| India | (India[MeSH Terms] OR Republic of India[MeSH Terms])) |
|-------|-------------------------------------------------------|

### Search results (PubMed):

(((((Diabetes Mellitus[MeSH Terms]) OR Cardiovascular Diseases[MeSH Terms] OR Hypertension[MeSH Terms])) AND (((((((((((((((Medication Adherence[MeSH Terms]) OR Patient Compliance[MeSH Terms]) OR No-Show Patients[MeSH Terms]) OR Health Personnel[MeSH Terms]) OR drug effects [Subheading]) OR (Treatment Adherence[MeSH Terms] OR Compliance[MeSH Terms])) OR Self Medication[MeSH Terms]) OR Self Administration[MeSH Terms]) OR Patient Medication Knowledge[MeSH Terms]) OR Attitude to Health[MeSH Terms]) OR Patient Acceptance of Health Care[MeSH Terms])) OR Patient Preference[MeSH Terms]) OR Patient Acceptance of Health Care[MeSH Terms]) OR Motivation[MeSH Terms]) OR Life Change Events[MeSH Terms]) OR Trust[MeSH Terms])))) AND (((((((((((Qualitative Research[MeSH Terms]) OR Focus Groups[MeSH Terms]) OR Anthropology, Cultural[MeSH Terms]) OR Ethnopsychology[MeSH Terms]) OR Grounded Theory[MeSH Terms]) OR Nursing Methodology Research[MeSH Terms]) OR Narrative Medicine[MeSH Terms]) OR Tape Recording[MeSH Terms]) OR Culture[MeSH Terms]) OR Attitude[MeSH Terms])) AND (India[MeSH Terms] OR Republic of India[MeSH Terms])) – 199 (Filters: Years between 2010 and 2020 and English language publication)

((((((((((((((Qualitative Research[MeSH Terms]) OR Focus Groups[MeSH Terms]) OR Anthropology, Cultural[MeSH Terms]) OR Ethnopsychology[MeSH Terms]) OR Grounded Theory[MeSH Terms]) OR Nursing Methodology Research[MeSH Terms]) OR Narrative Medicine[MeSH Terms]) OR Tape Recording[MeSH Terms]) OR Culture[MeSH Terms]) OR Attitude[MeSH Terms] Case studies OR Focused group discussions OR phenomenological studies OR ethnographic studies OR interviews))) AND (((((((((((((((Medication Adherence[MeSH Terms]) OR Patient Compliance[MeSH Terms]) OR No-Show Patients[MeSH Terms]) OR Health Personnel[MeSH Terms]) OR drug effects [Subheading]) OR (Treatment Adherence[MeSH Terms] OR Compliance[MeSH Terms])) OR Self Medication[MeSH Terms]) OR Self Administration[MeSH Terms]) OR Patient Medication Knowledge[MeSH Terms]) OR Attitude to Health[MeSH Terms]) OR Patient Acceptance of Health Care[MeSH Terms])) OR Patient Preference[MeSH Terms]) OR Patient Acceptance of Health Care[MeSH Terms]) OR Motivation[MeSH Terms])) AND (Challenges OR Challenge OR Problem OR Problems barriers OR Difficulties OR Issues OR Limitations OR Obstacles OR Facilitators OR Suggestions OR Solutions)) AND (((((((Diabetes Mellitus[MeSH Terms]) OR Cardiovascular Diseases[MeSH Terms] OR Hypertension[MeSH Terms] OR Coronary Disease[MeSH Terms] OR Coronary Artery Disease[MeSH Terms] OR Heart Diseases[MeSH Terms] OR Cerebrovascular Diseases[MeSH Terms] OR Stroke[MeSH Terms])))) AND ((India[MeSH Terms] OR Republic of India[MeSH Terms])))) – 31 results (Filters: Years between 2010 and 2020 and English language publication)

**Google scholar:** 635 + 22 + 6 + 12 = 675

**ScienceDirect:** (Diabetes Mellitus OR Cardiovascular Diseases OR Hypertension) AND (Qualitative Study OR Qualitative) AND (India) AND (Adherence) – 238 articles

**Cochrane library:** (Diabetes Mellitus OR Cardiovascular Diseases OR Hypertension) AND (Qualitative Study OR Qualitative) AND (India) AND (Adherence) – 34 articles
